# Supplementary material
Source: PubMed Central journal article supplement (PMC4136342)
Supplement: JVI.01080-14_zjv999099437so1.pdf [file JVI.01080-14_zjv999099437so1.pdf]

## Supplementary Materials

**Figure S1. Phylogenetic relationships between human and swine PB2 segments.** Time-scaled Bayesian MCC tree of full-length PB2 sequences of 4 swine influenza viruses with PB2 segments identified as of human seasonal virus origin and 126 human seasonal H3N2 influenza viruses sampled globally, collected 1968-2013. Branches associated with viruses from swine are shaded by country of origin: Argentina = sea green, Canada = blue, Europe = orange. Labeling is similar to Fig. 1.

**Figure S2. Phylogenetic relationships between human and swine PB1 segments.** Time-scaled Bayesian MCC tree of full-length PB1 sequences of 305 swine influenza viruses with PB1 segments identified as of human seasonal virus origin and 126 human seasonal H3N2 influenza viruses sampled globally, collected 1968-2013. Branches associated with viruses from swine are shaded by country of origin: Argentina = sea green, Canada = blue, Europe = orange, USA = dark blue, China = red, South Korea = green, Vietnam = purple. Labeling is similar to Fig. 1.

**Figure S3. Phylogenetic relationships between human and swine PA segments.** Time-scaled Bayesian MCC tree of full-length PA sequences of four swine influenza viruses with PA segments identified as of human seasonal virus origin and 126 human seasonal H3N2 influenza viruses sampled globally, collected 1968-2013. Shading and labeling is identical to that provided in Fig. S1.

**Figure S4. Phylogenetic relationships between human and swine NP segments.** Time-scaled Bayesian MCC tree of full-length NP sequences of four swine influenza viruses with NP segments identified as of human seasonal virus origin and 126 human seasonal H3N2 influenza viruses sampled globally, collected 1968-2013. Shading and labeling is identical to that provided in Fig. S1.

**Figure S5. Phylogenetic relationships between human and swine N1 segments.** Time-scaled Bayesian MCC tree of the NA (N1) sequences of 6 swine influenza viruses identified as of human seasonal virus origin and 116 human seasonal H1N1 influenza viruses, collected 1977-2009. Branches of human seasonal H1N1 influenza viruses origin are shaded blue, while branches associated with viruses from swine are shaded by country of origin: Argentina (Arg) = red and USA = green. Labeling is similar to Fig. 1.

**Figure S6. Phylogenetic relationships between human and swine MP segments.** Time-scaled Bayesian MCC tree of full-length MP sequences of four swine influenza viruses with MP segments identified as of human seasonal virus origin and 126 human seasonal H3N2 influenza viruses sampled globally, collected 1968-2013. Shading and labeling is identical to that provided in Fig. S1.

**Figure S7. Phylogenetic relationships between human and swine NS segments.** Time-scaled Bayesian MCC tree of full-length NS sequences of four swine influenza viruses with NS segments identified as of human seasonal virus origin and 126 human seasonal H3N2 influenza viruses sampled globally, collected 1968-2013. Shading and labeling is identical to that provided in Fig. S1.

**Figure S8. Maximum likelihood tree of human and swine PB2 segments.** Similar tree as that presented in Fig S1, but inferred using maximum likelihood (ML) methods. Branch lengths represent genetic distance and are drawn to scale. Bootstrap values for key nodes > 75 are provided. Introductions 8, 9, and 18 are labeled similar to Fig. S1.

**Figure S9. Reassortment in the N2 phylogeny.** The identical MCC tree of the N2 presented in Fig. 3, but with branches shaded in FigTree v1.4.0 by the evolutionary origins of the associated PB2 segment, to highlight reassortment events between the N2 and PB2 segments in swine: PB2 segments of classical swine origin = red, Eurasian avian-origin swine = yellow, pandemic H1N1 in

swine = blue, triple reassortant internal genes (TRIG) = purple, and human seasonal lineage = green. Labeling is similar to Fig. 3, but the three swine viruses with PB2 segments related to human seasonal viruses are indicated with an asterisk (\*).

**Figure S10. Host-specific evolutionary rates in the H1 phylogeny.** Similar MCC tree of H1 as presented in Fig. 4, but inferred using a host-specific local clock (HSLC) model implemented for three monophyletic swine clades (introductions 6, 7, and 11, Table 1). Branches representing human-to-swine transmission events are labeled with a solid black circle, and branches are shaded by the host-specific evolutionary rates (nucleotide substitutions per site per year). Posterior probabilities > 90 for key nodes are provided, and for clarity some of the branches in introduction 6 have been collapsed.

**Figure S11. Host-specific evolutionary rates in the H3 phylogeny.** Similar MCC tree of H3 as presented in Fig. 1, but inferred using a host-specific local clock (HSLC) model implemented for all monophyletic swine clades. Branches representing human-to-swine transmission events are labeled with a solid black circle, and branches are shaded by the host-specific evolutionary rates (nucleotide substitutions per site per year). Posterior probabilities > 90 for key nodes are provided.

**Figure S12. Host-specific evolutionary rates in the N2 phylogeny.** Similar MCC tree of N2 as presented in Fig. 3, but inferred using a host-specific local clock (HSLC) model implemented for all monophyletic swine clades. Branches representing human-to-swine transmission events are labeled with a solid black circle, and branches are shaded by the host-specific evolutionary rates (nucleotide substitutions per site per year). Posterior probabilities > 90 for key nodes are provided.

**Figure S13. Phylogenetic relationships between human and swine H3 segments.** Time-scaled Bayesian MCC tree of full-length H3 sequences of 341 swine influenza viruses with H3 segments identified as of human seasonal virus origin and 257 human seasonal H3N2 influenza viruses

sampled globally, collected 1968-2013. Branches associated with viruses from swine are shaded by country of origin: Argentina = brown, Canada = pink, Europe = orange, USA = dark blue, China = red, South Korea = teal green, South-east Asia (Vietnam, Thailand, Indonesia, Sri Lanka) = light blue, Japan = dark green, Mexico = pink. Labeling is similar to Fig. 1, and additional human-to-swine introductions not identified via whole-genome analysis are labeled with lower-case letters and associated country, names of all viruses provided in Table S4.

**Figure S14. Phylogenetic relationships between human and swine N1 segments.** Time-scaled Bayesian MCC tree of full-length N1 sequences of 15 swine influenza viruses with N1 segments identified as of human seasonal virus origin and 116 human seasonal H1N1 influenza viruses sampled globally, collected 1977-2009. Labeling is similar to Fig. S13.

**Figure S15. Phylogenetic relationships between human and swine N2 segments.** Time-scaled Bayesian MCC tree of full-length N2 sequences of 936 swine influenza viruses with N2 segments identified as of human seasonal virus origin and 326 human seasonal H1N2 and H3N2 influenza viruses sampled globally, collected 1968-2013. Branches associated with viruses from swine are shaded by country of origin: Argentina = green, Canada = light blue, Europe = orange, USA = dark blue, China = red, South Korea = pink, Thailand = light purple, Japan = light green, Mexico = brown, Vietnam = grey. Labeling is similar to Fig. S13.

- Argentina (swine)
- Canada (swine)
- Europe (swine)
- human

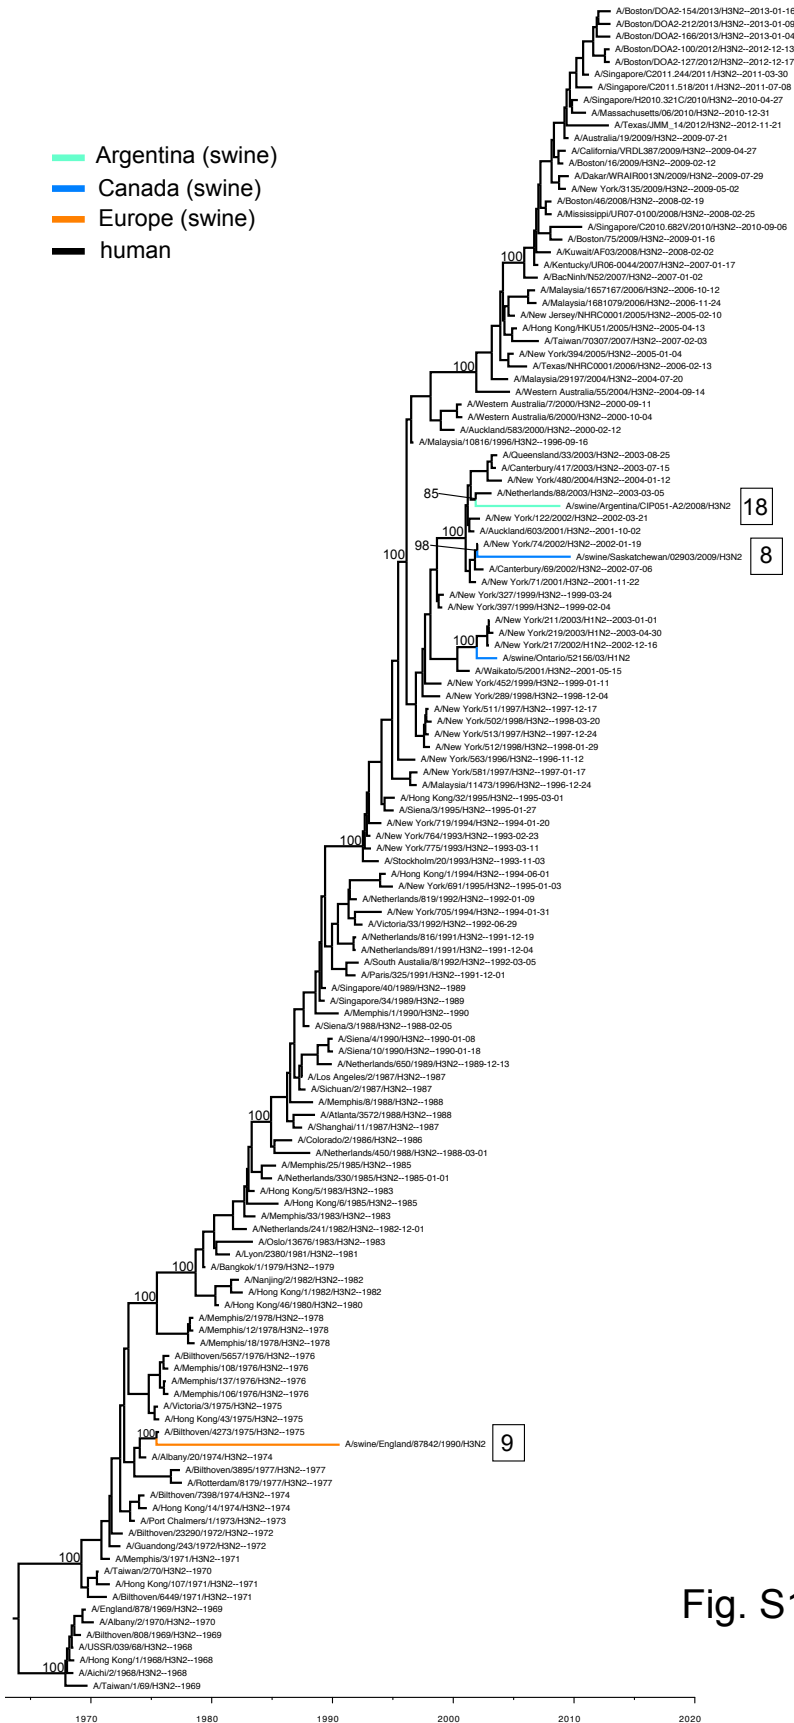

Fig. S1

- █ Argentina
- █ Canada
- █ Europe
- █ USA
- █ China
- █ Korea
- █ Vietnam
- █ human

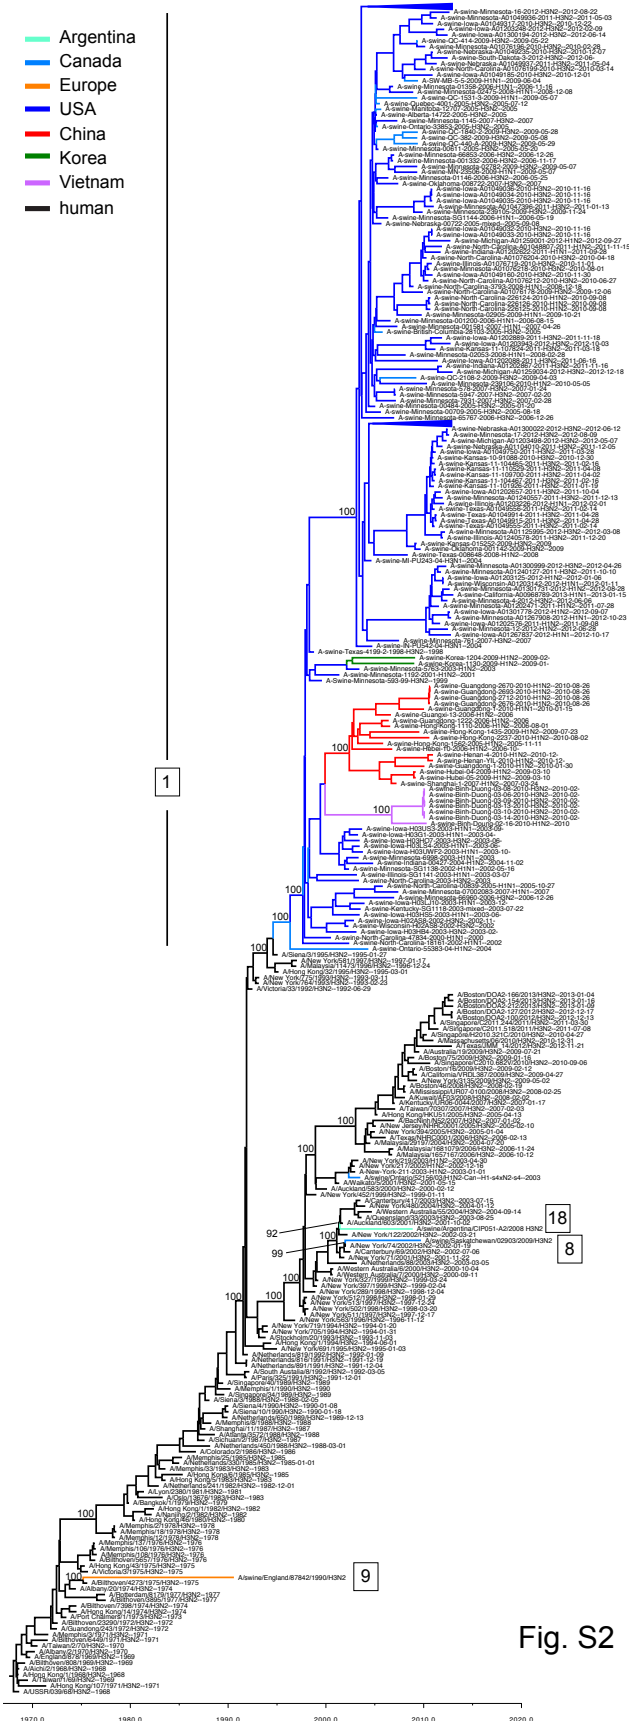

Fig. S2

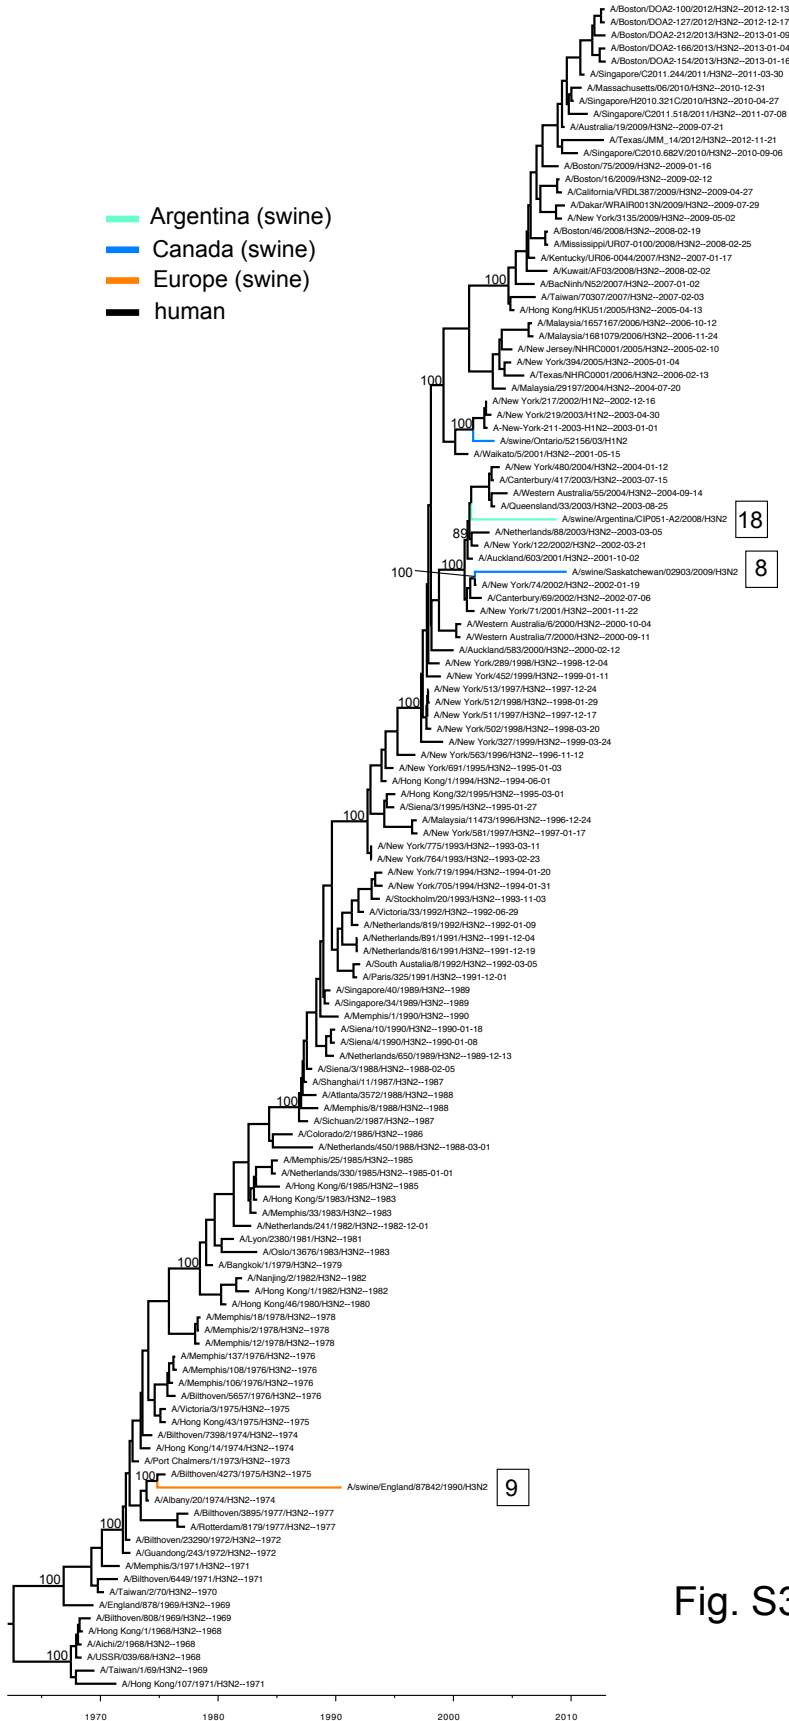

Fig. S3

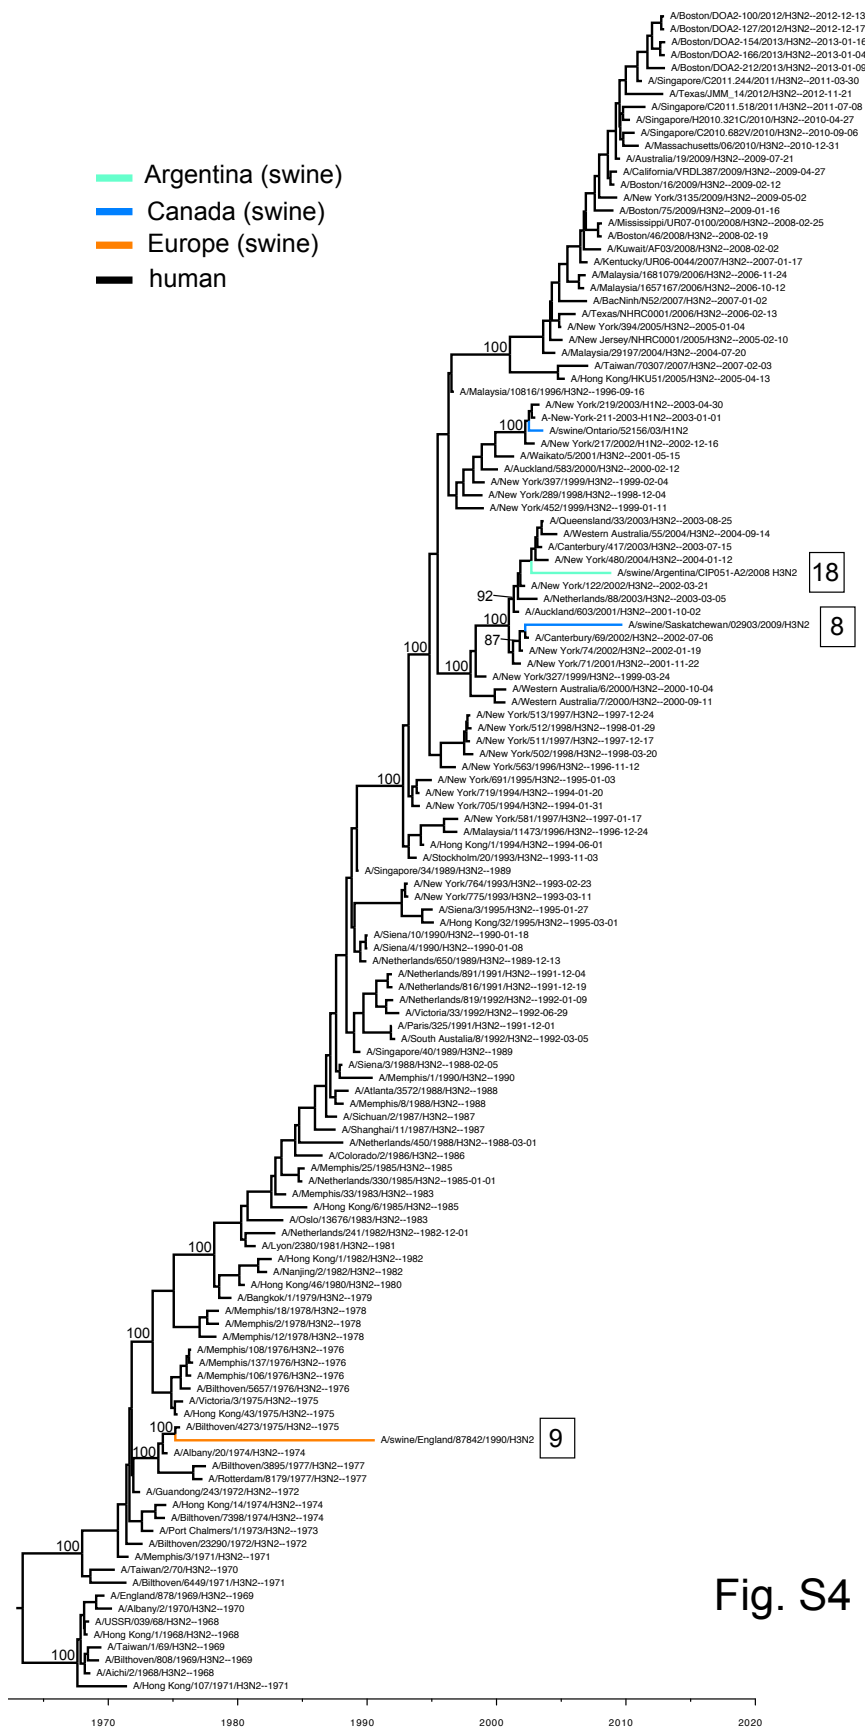

Fig. S4



location  
■ Arg  
■ USA  
■ human

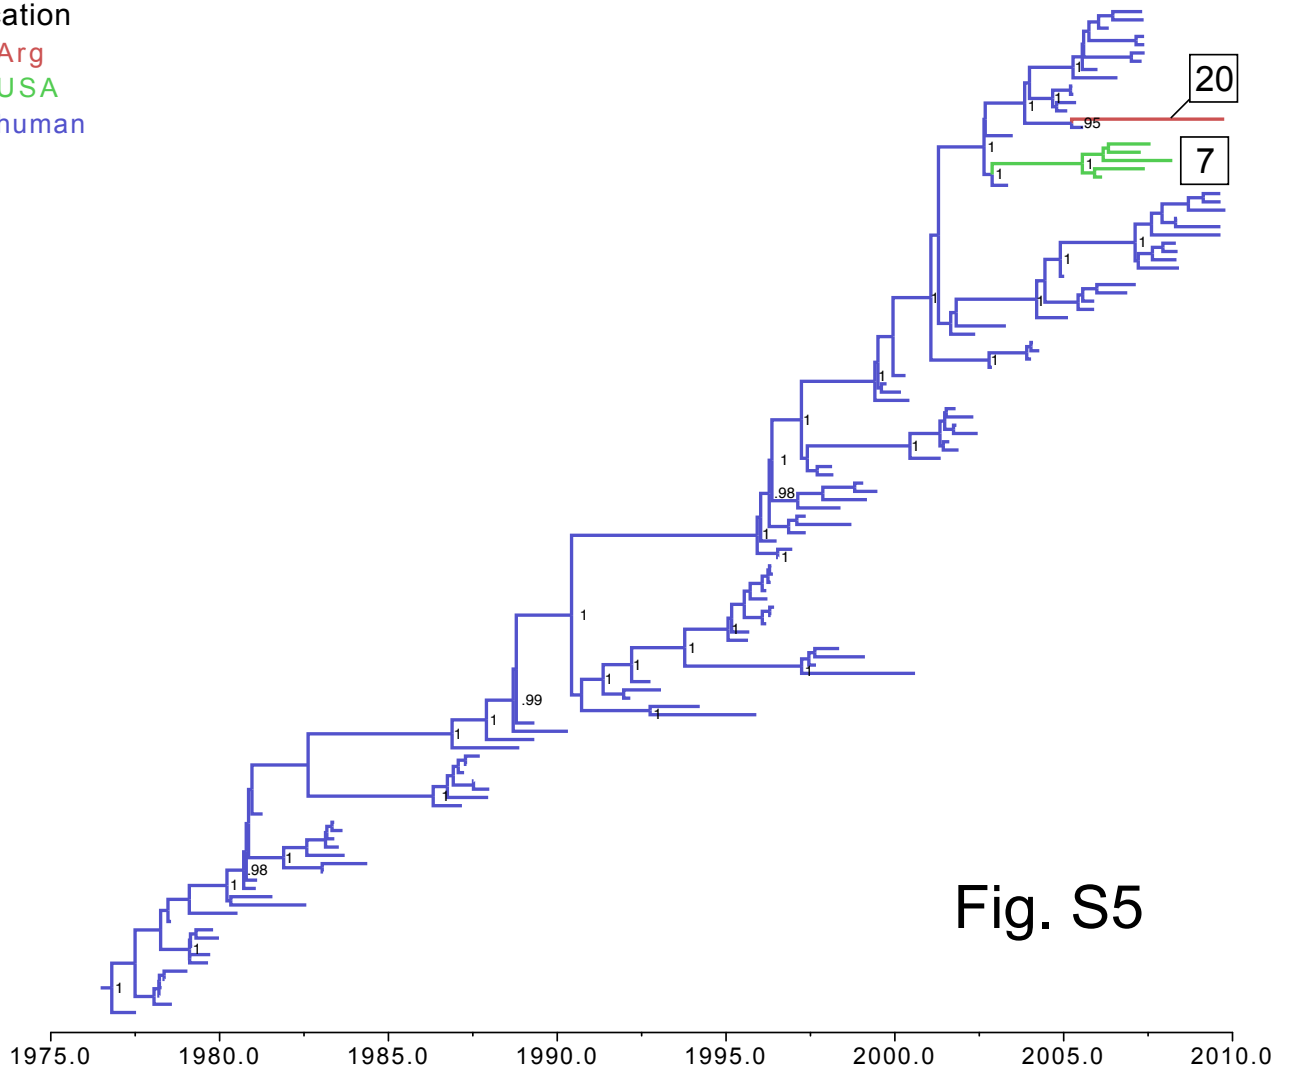

Fig. S5

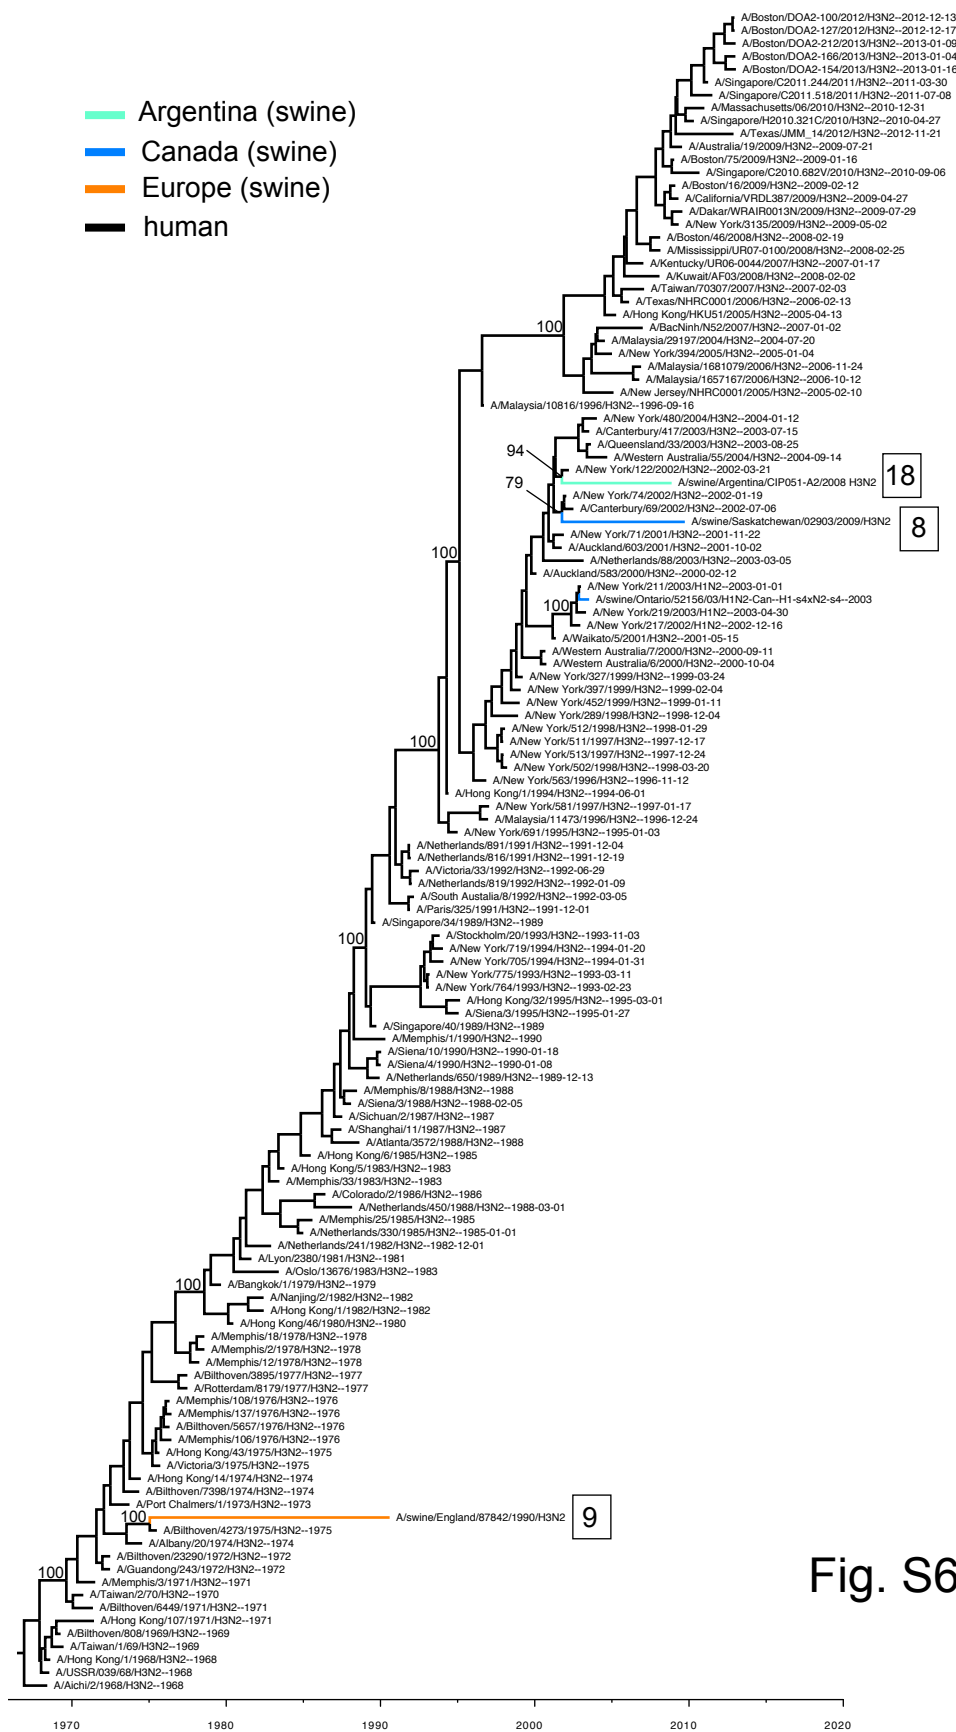

- Argentina (swine)
- Canada (swine)
- Europe (swine)
- human

Fig. S6

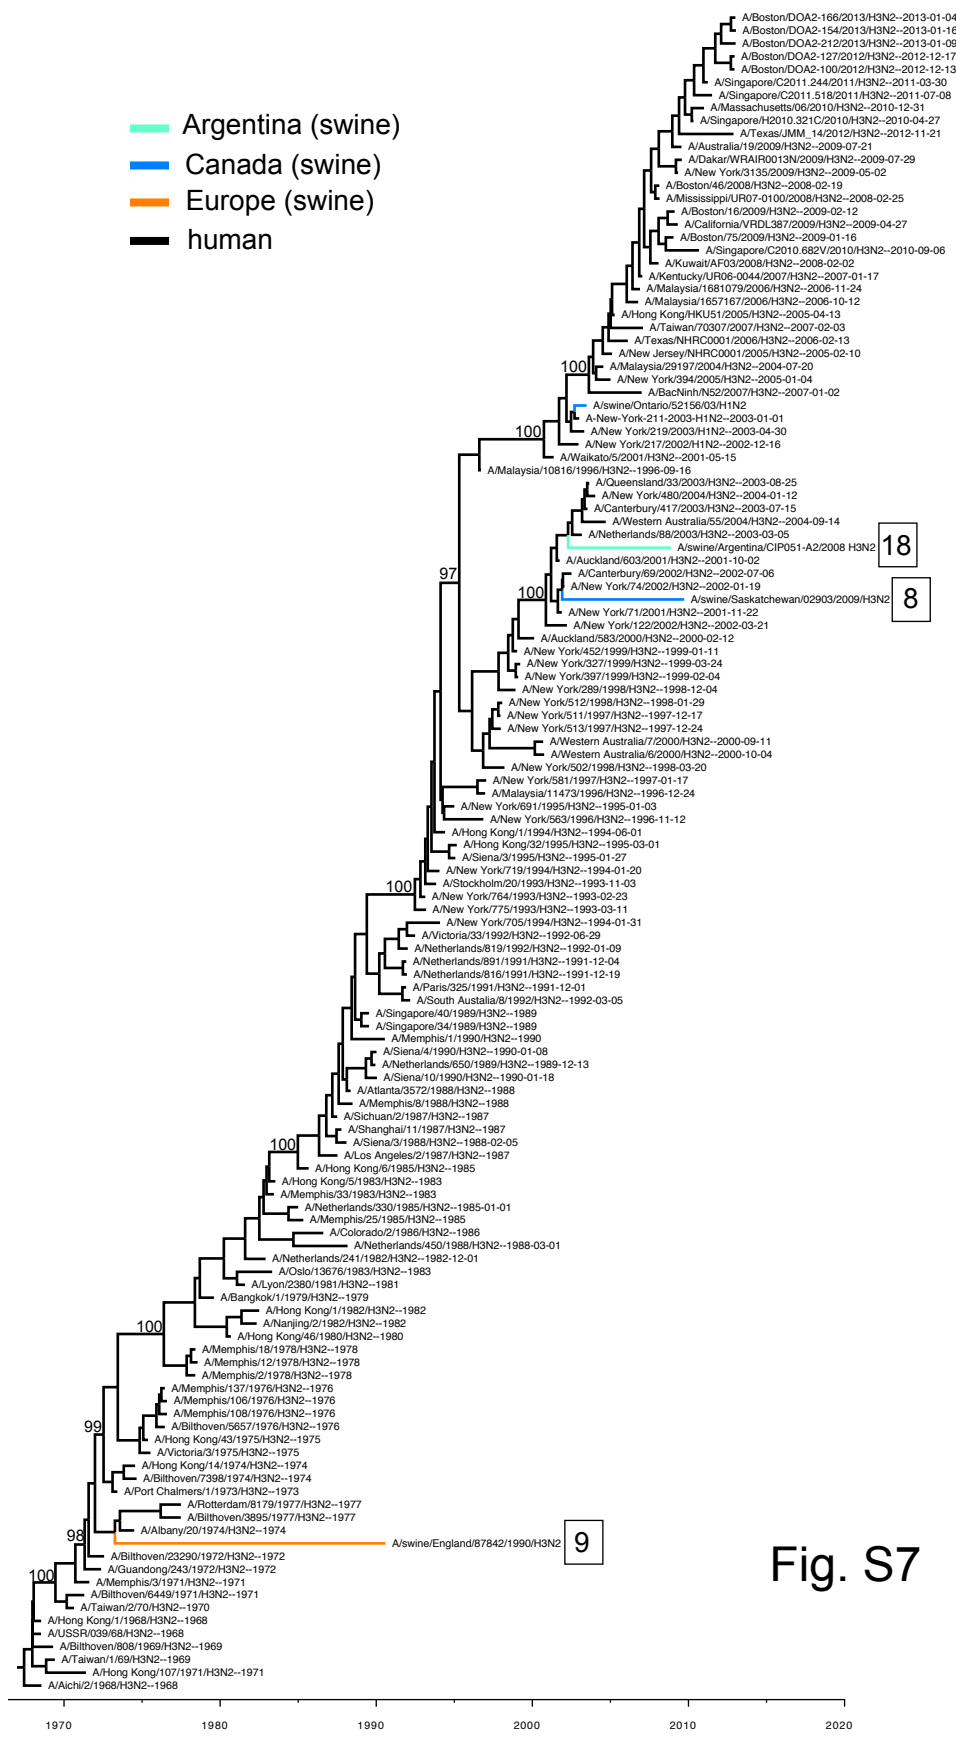

Fig. S7

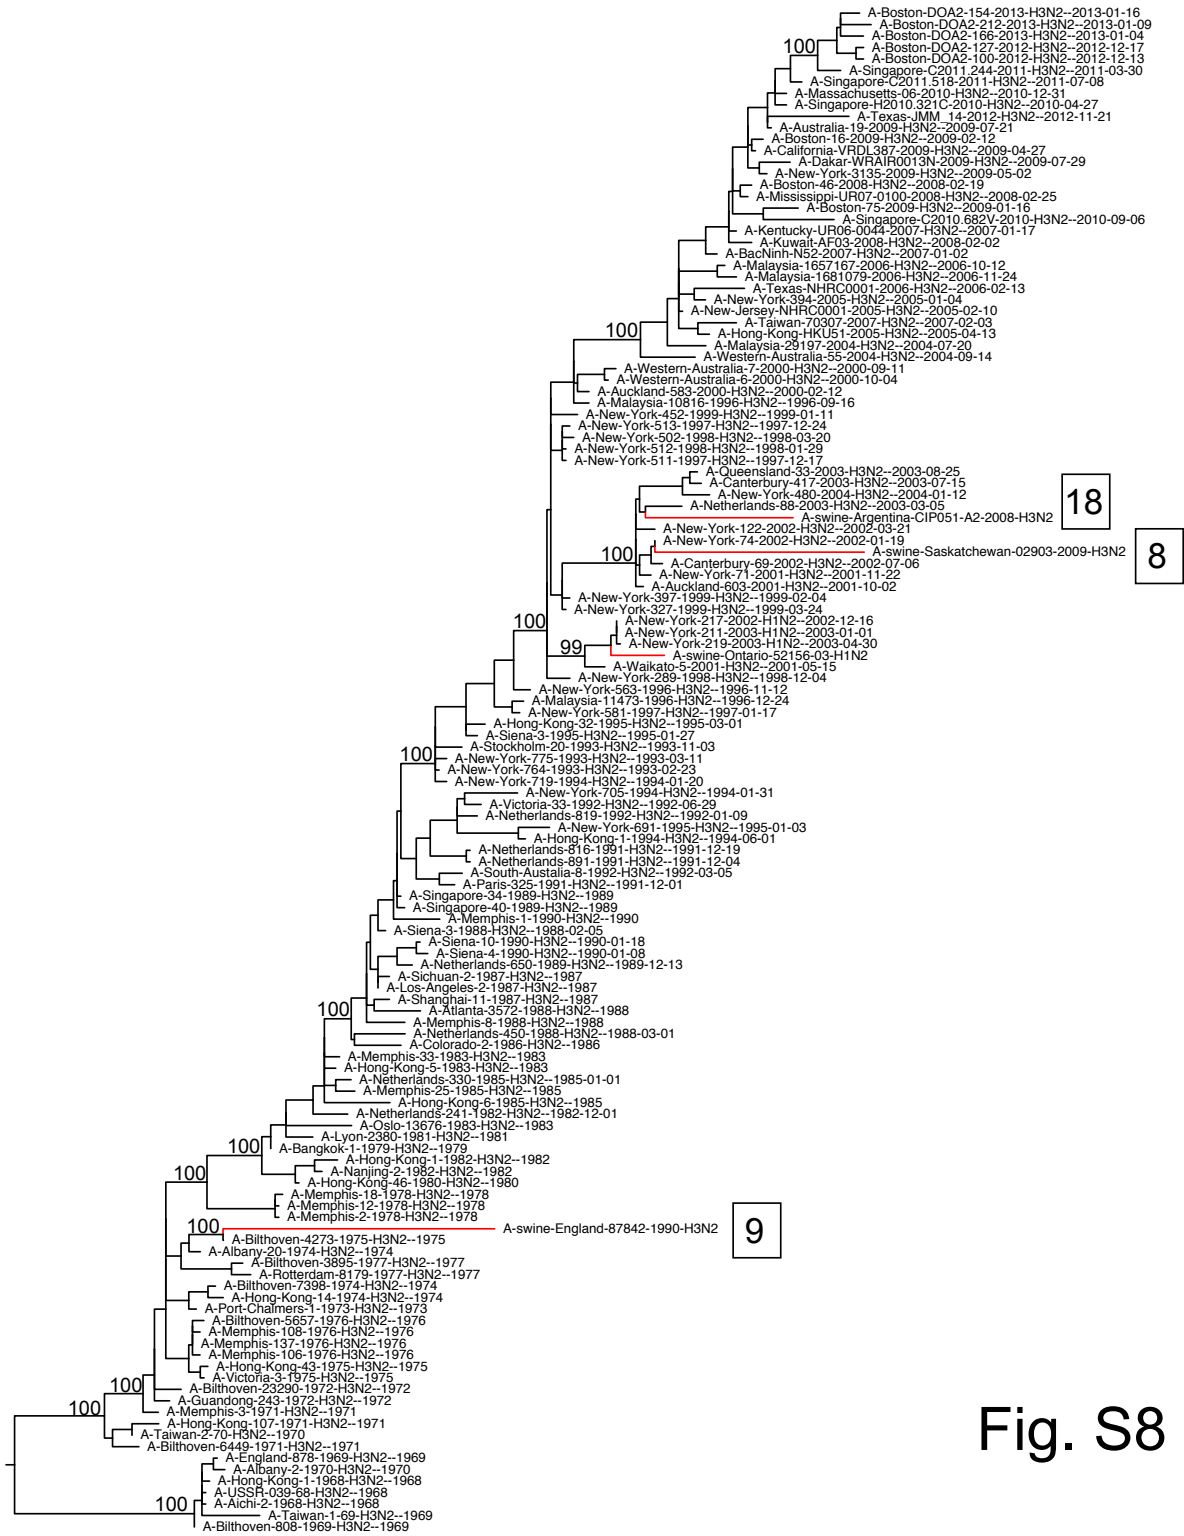

Fig. S8

PB2

- classical swine
- eurasian avian-origin swine
- human seasonal
- pandemic swine
- triple reassortant swine (trig)

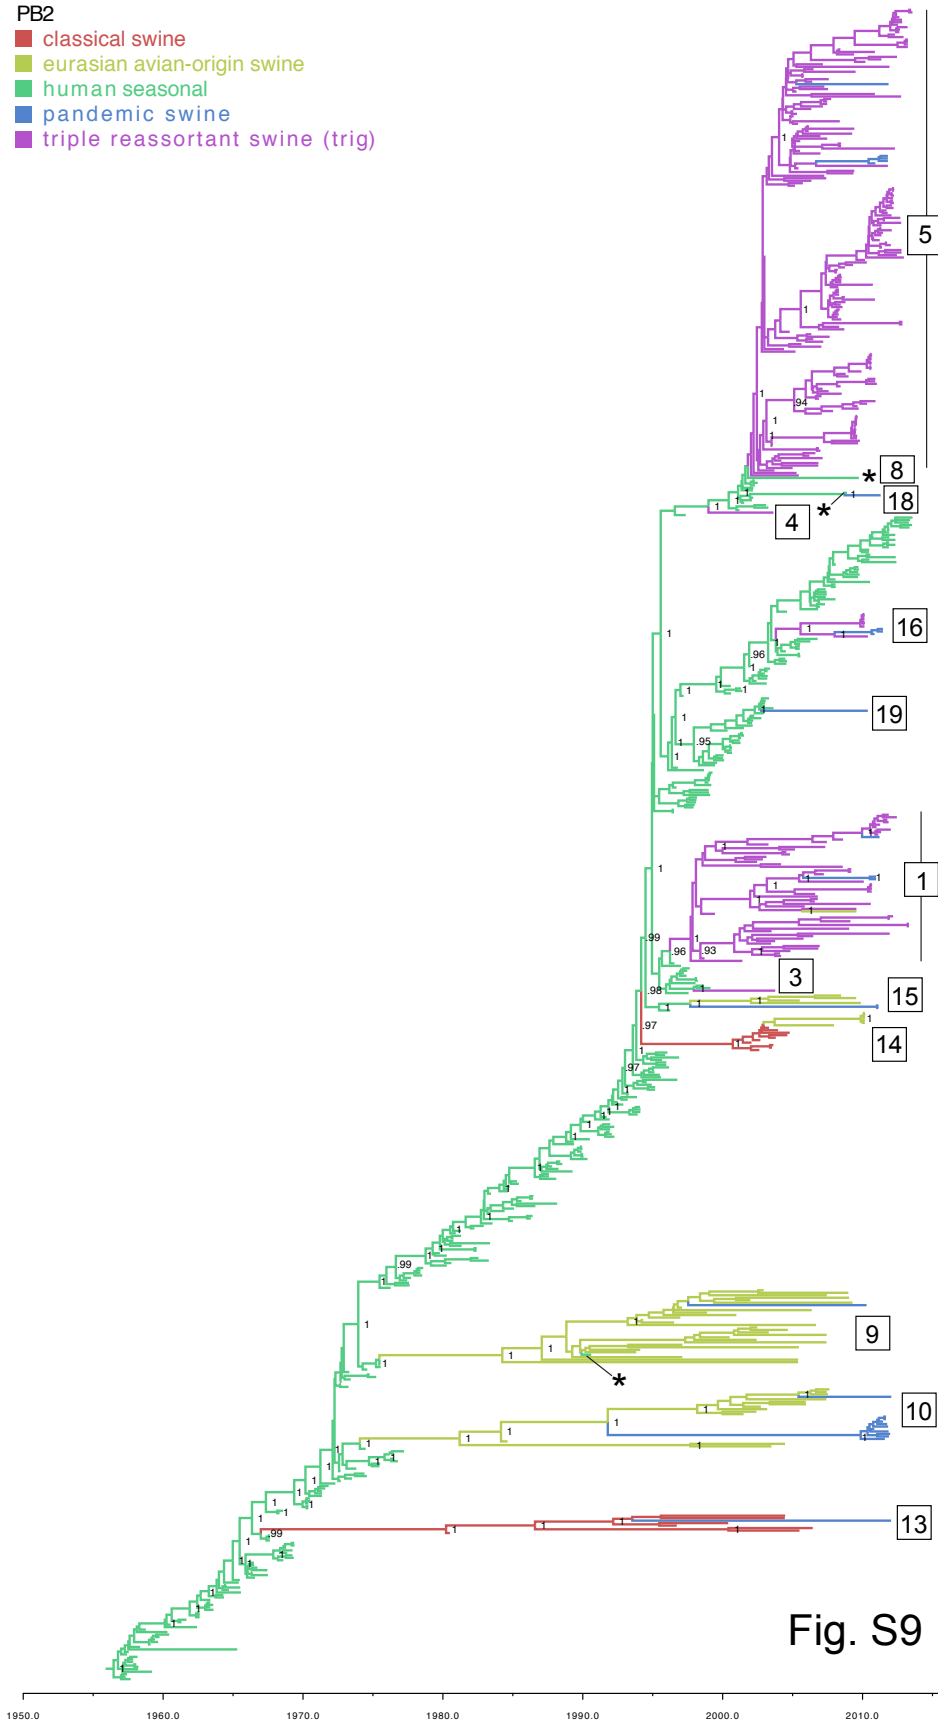

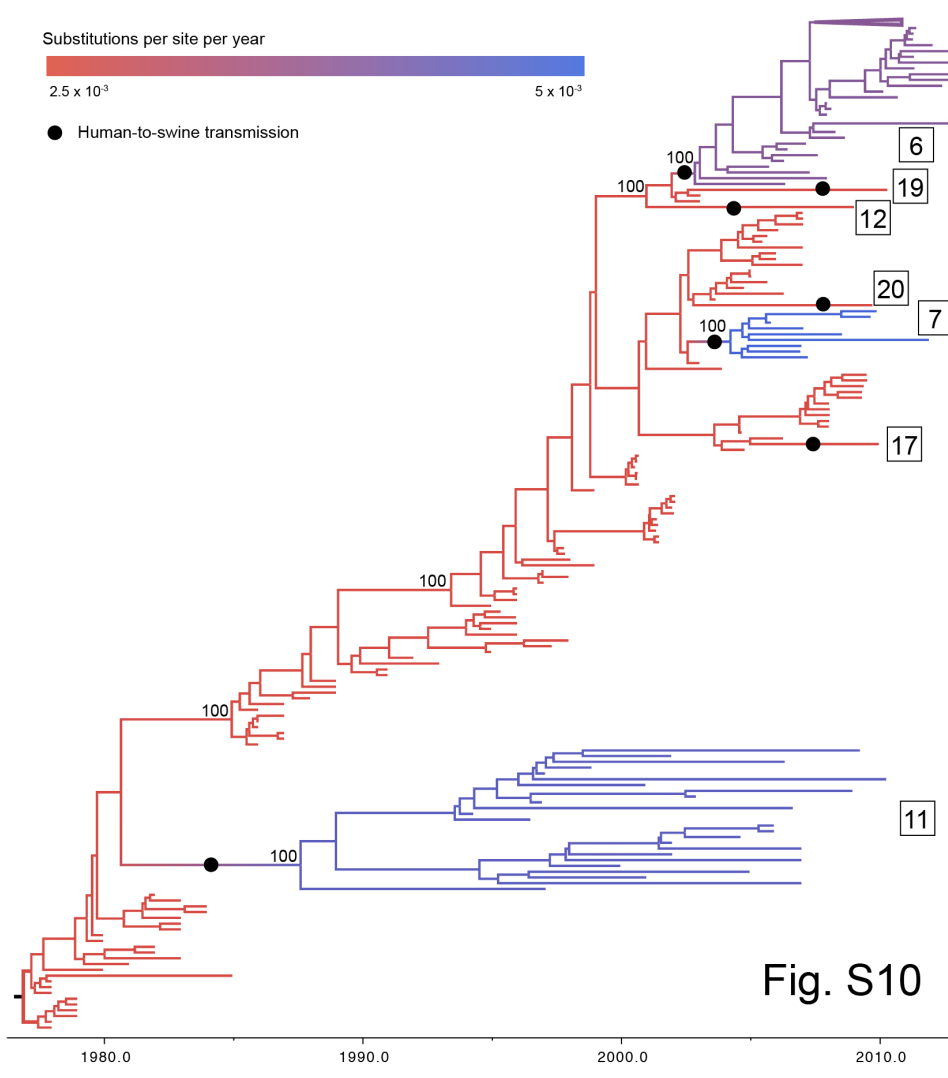

Fig. S10

Substitutions per site per year

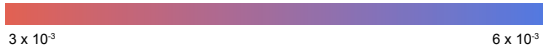

● Human-to-swine transmission

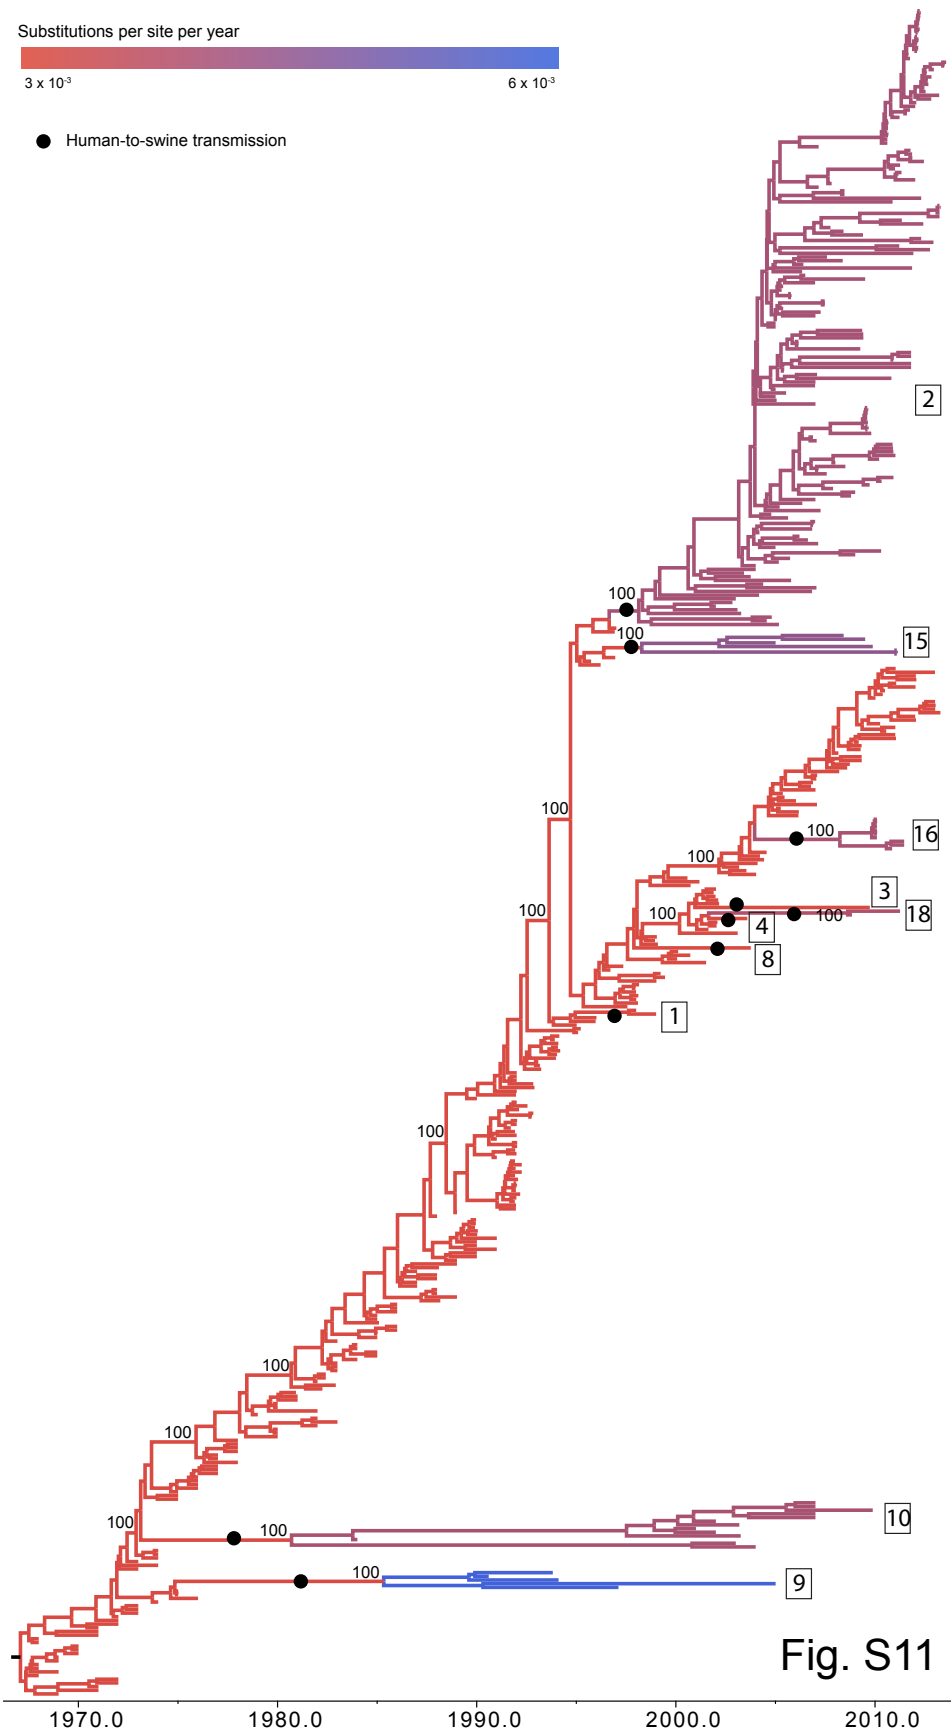

Fig. S11

Substitutions per site per year

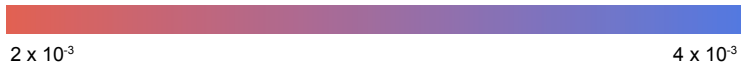

● Human-to-swine transmission

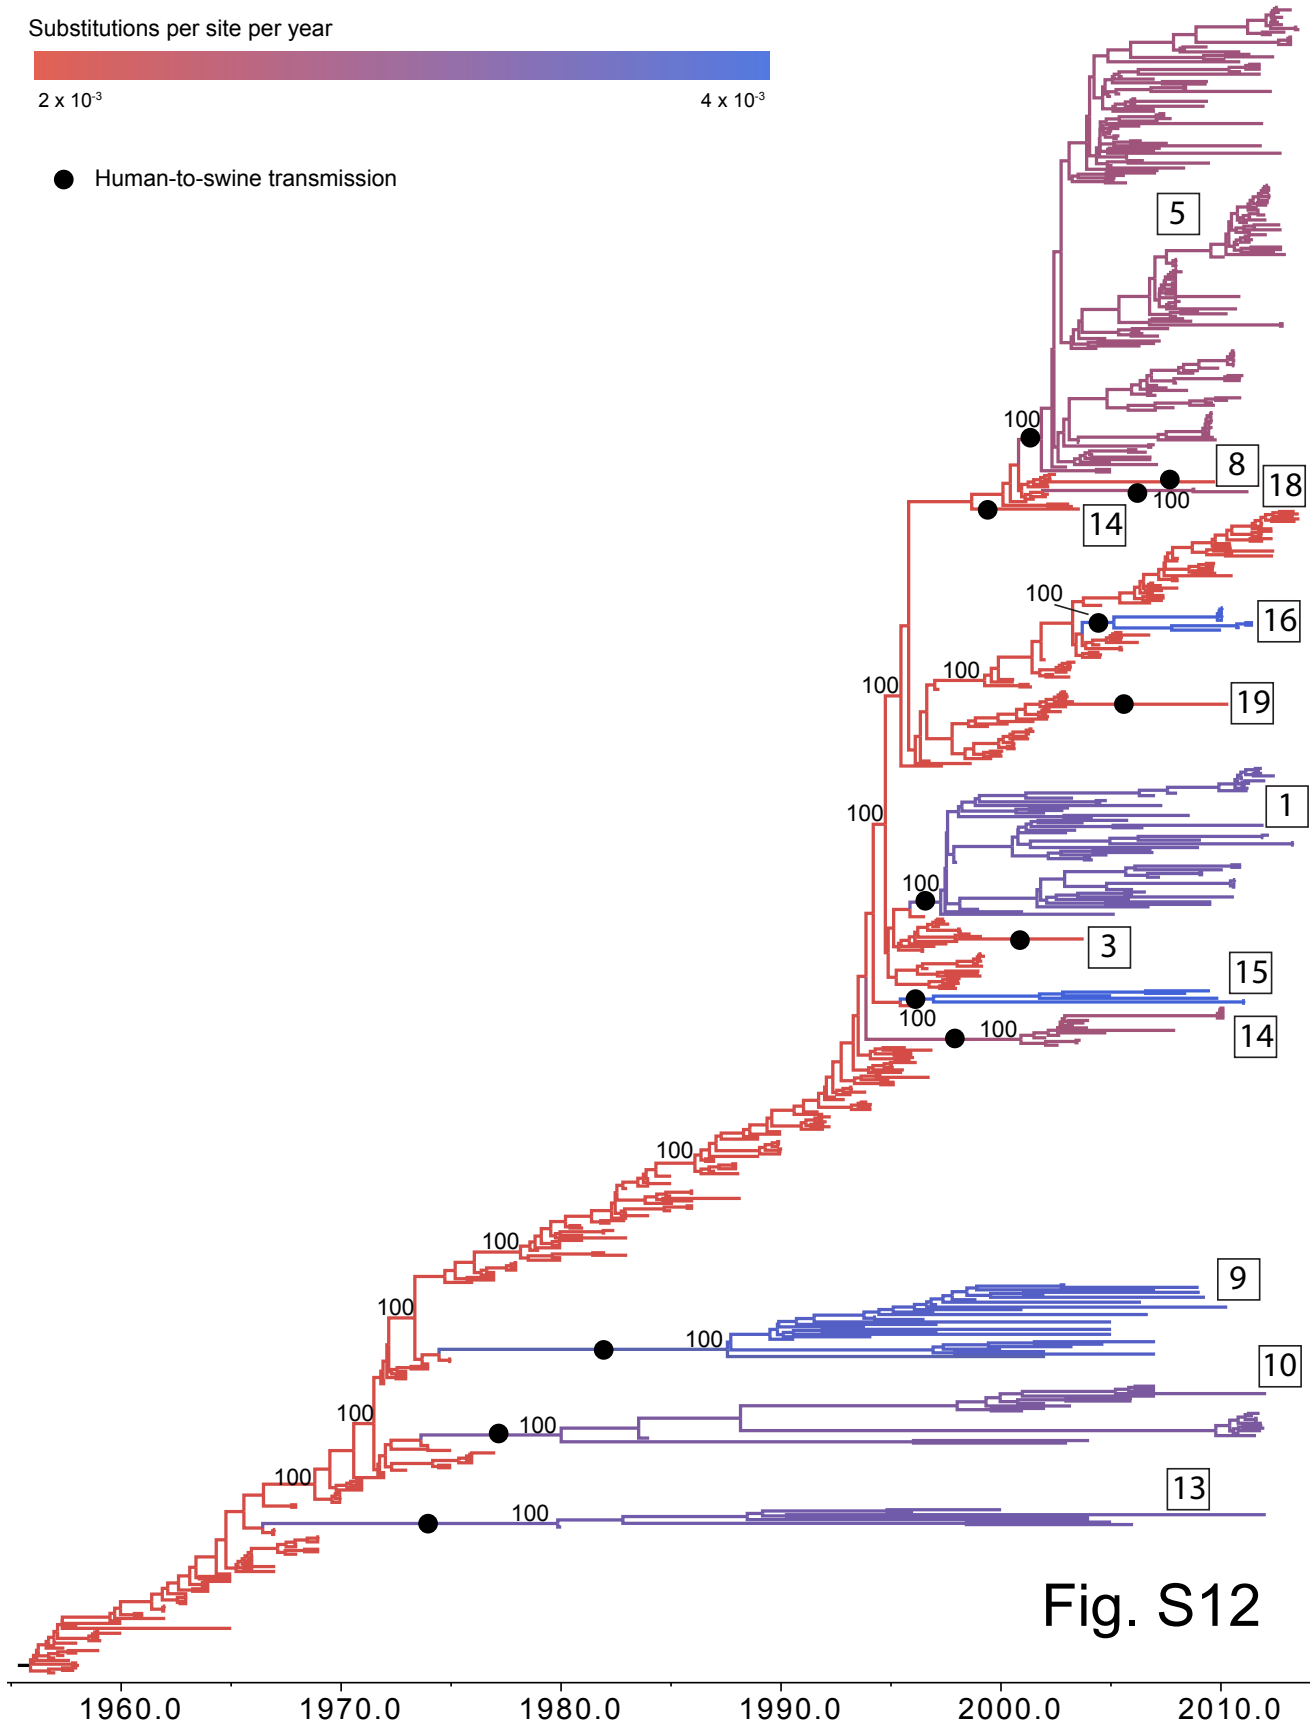

Fig. S12



- USA
- Canada
- China
- Europe
- S Korea
- South-east Asia
- Japan
- Mexico
- Argentina

2

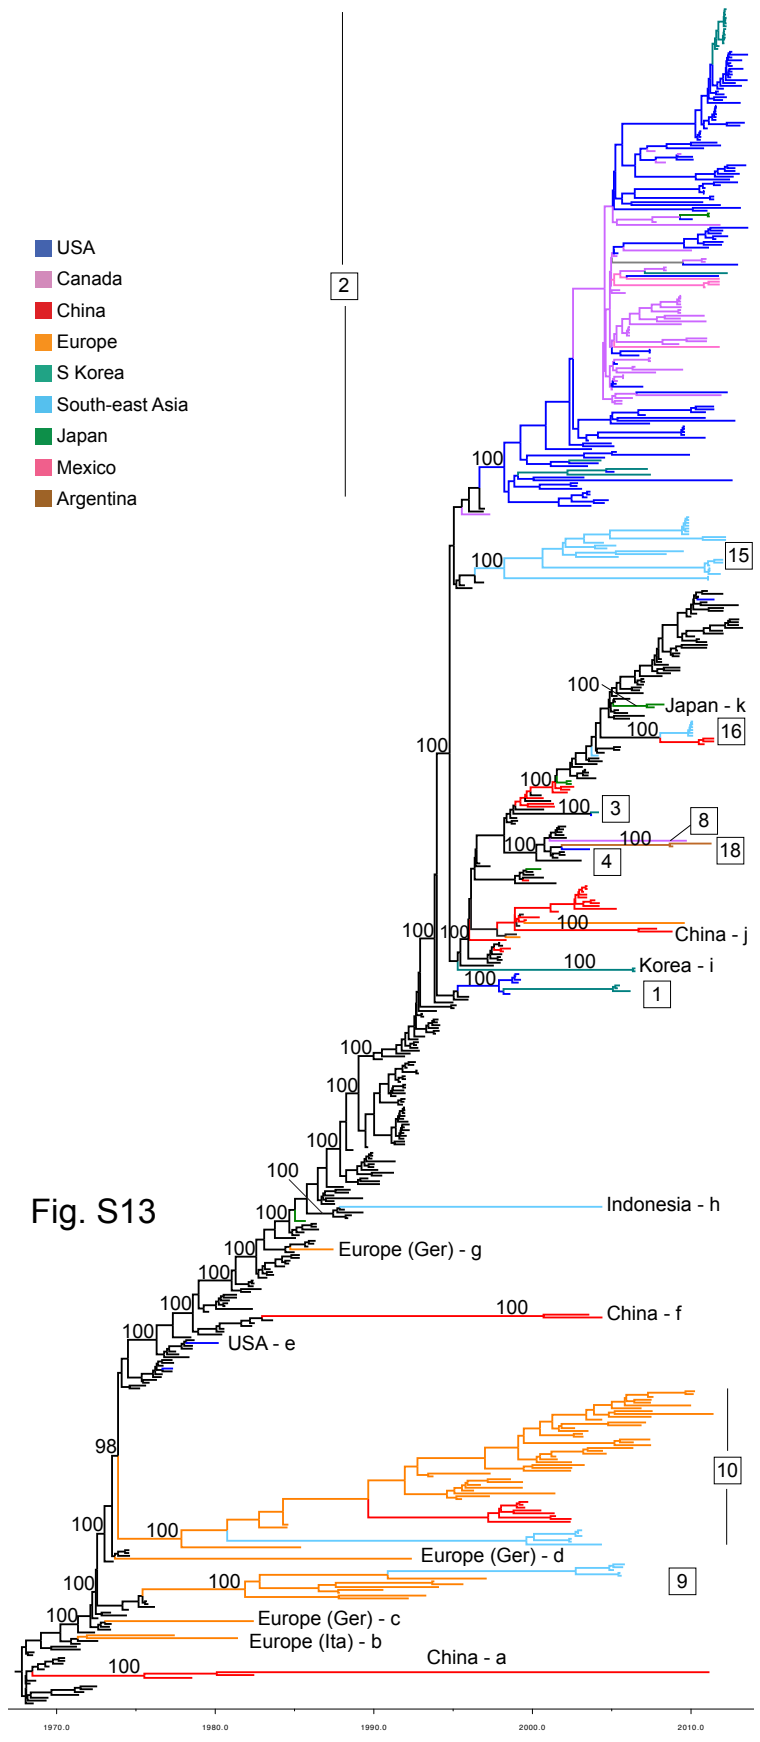

Fig. S13

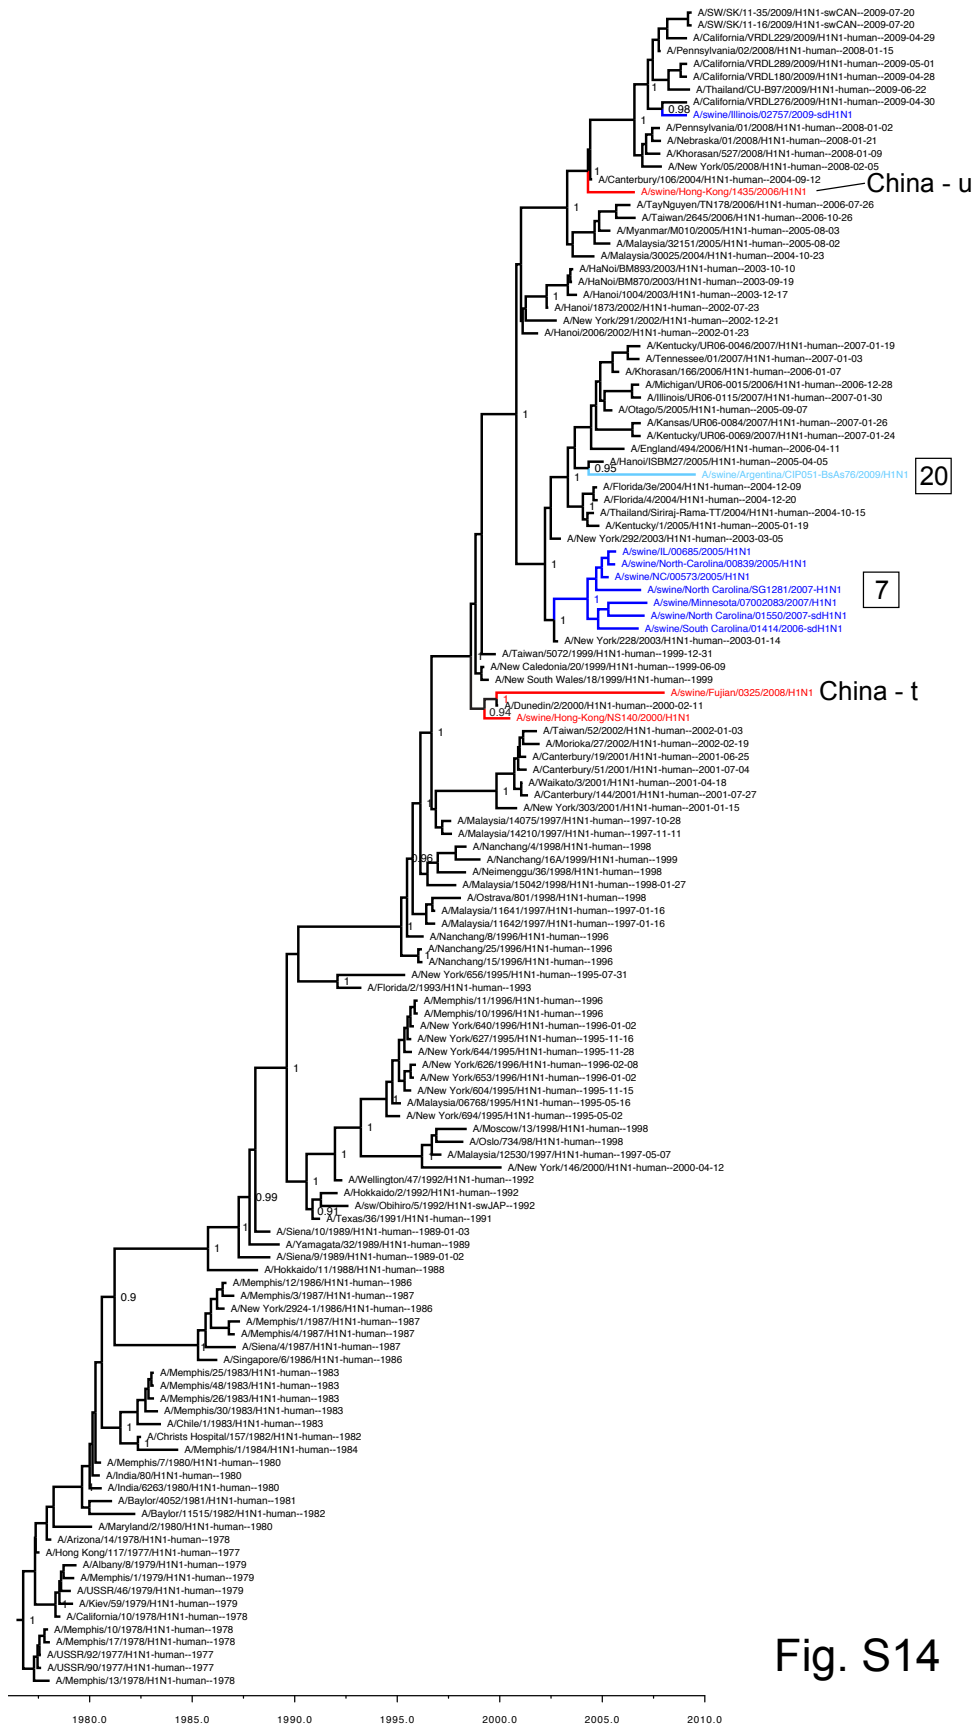

Fig. S14

- USA
- Canada
- China
- Europe
- S Korea
- Thailand
- Japan
- Mexico
- Vietnam
- Argentina

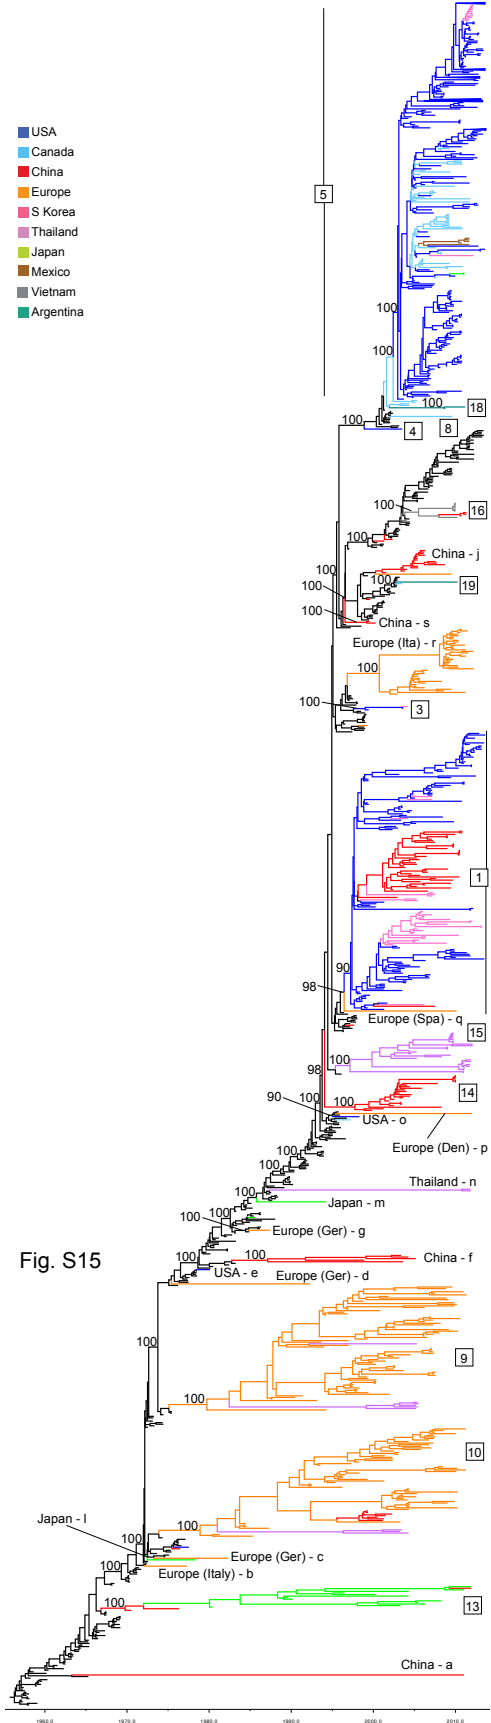

Fig. S15

**Table S1.** The 141 viruses collected from North American swine (United States, Canada, and Mexico) during 2002-2011 that were whole-genome sequenced for this study at the J. Craig Venter Institute (Rockville, MD). GenBank accession numbers are available (PB2), as well as country and date of viral collection.

|    | <b>Virus name</b>                         | <b>Accession</b> | <b>Host</b> | <b>Country</b> | <b>Date</b> |
|----|-------------------------------------------|------------------|-------------|----------------|-------------|
| 1  | A/swine/Alberta/00805/2005(H3N2)          | AHB22080         | Swine       | Canada         | 10/10/05    |
| 2  | A/swine/Alberta/SG1405/2005(H3N2)         | AHB22068         | Swine       | Canada         | 10/7/05     |
| 3  | A/swine/Alberta/SG1415/2006(H1N1)         | AHB22507         | Swine       | Canada         | 3/13/06     |
| 4  | A/swine/Arkansas/01460/2007(H1N1)         | AHB21170         | Swine       | USA            | 1/31/07     |
| 5  | A/swine/Arkansas/02927/2009(H1N2)         | AHB23082         | Swine       | USA            | 12/2/09     |
| 6  | A/swine/Arkansas/SG1241/2006(H1N1)        | AHB21014         | Swine       | USA            | 5/2/06      |
| 7  | A/swine/Arkansas/SG1295/2008(H3N2)        | AHB21376         | Swine       | USA            | 5/15/08     |
| 8  | A/swine/Arkansas/SG1297/2008(H3N2)        | AHB21388         | Swine       | USA            | 10/15/08    |
| 9  | A/swine/Arkansas/SG1298/2008(H3N2)        | AHB21400         | Swine       | USA            | 12/30/08    |
| 10 | A/swine/Arkansas/SG1327/2009(H1N1)        | AHB23833         | Swine       | USA            | 10/30/09    |
| 11 | A/swine/Arkansas/SG1377/2011(H1N2)        | AHB21864         | Swine       | USA            | 4/29/11     |
| 12 | A/swine/Arkansas/SG1382/2011(H1N2)        | AHB24586         | Swine       | USA            | 6/14/11     |
| 13 | A/swine/British Columbia/00633/2005(H3N2) | AHB22056         | Swine       | Canada         | 5/19/05     |
| 14 | A/swine/Georgia/SG1251/2006(H1N1)         | AHB23701         | Swine       | USA            | 5/12/06     |
| 15 | A/swine/Illinois/00303/2004(H3N2)         | AHB20891         | Swine       | USA            | 5/18/04     |
| 16 | A/swine/Illinois/01131/2006(H3N2)         | AHB21158         | Swine       | USA            | 5/5/06      |
| 17 | A/swine/Illinois/02166/2008(H1N1)         | AHB22377         | Swine       | USA            | 5/1/08      |
| 18 | A/swine/Iowa/SG1469/2004(H3N2)            | AHB22794         | Swine       | USA            | 10/14/04    |
| 19 | A/swine/Kansas/00246/2004(H1N2)           | AHB22293         | Swine       | USA            | 2/5/04      |
| 20 | A/swine/Kentucky/SG1118/2003(mixed)       | AEO91609         | Swine       | USA            | 7/22/03     |
| 21 | A/swine/Kentucky/SG1277/2007(H1N1)        | AHB21254         | Swine       | USA            | 3/16/07     |
| 22 | A/swine/Manitoba/00446/2005(H3N2)         | AHB22495         | Swine       | Canada         | 1/25/05     |
| 23 | A/swine/Manitoba/01179/2006(H3N2)         | AHB22116         | Swine       | Canada         | 6/29/06     |
| 24 | A/swine/Manitoba/01642/2007(H3N2)         | AHB22128         | Swine       | Canada         | 6/20/07     |
| 25 | A/swine/Manitoba/01643/2007(H3N2)         | AHB22140         | Swine       | Canada         | 6/20/07     |
| 26 | A/swine/Manitoba/01781/2007(H1N1)         | AHB22519         | Swine       | Canada         | 10/2/07     |
| 27 | A/swine/Manitoba/01782/2007(H3N2)         | AHB22164         | Swine       | Canada         | 10/3/07     |
| 28 | A/swine/Manitoba/02182/2008(H3N2)         | AHB22176         | Swine       | Canada         | 5/30/08     |
| 29 | A/swine/Manitoba/02862/2009(H3N2)         | AHB22212         | Swine       | Canada         | 7/1/09      |
| 30 | A/swine/Manitoba/SG1431/2008(H3N2)        | AHB22188         | Swine       | Canada         | 6/17/08     |
| 31 | A/swine/Manitoba/SG1432/2008(H3N2)        | AHB22200         | Swine       | Canada         | 6/17/08     |
| 32 | A/swine/Manitoba/SG1438/2011(H3N2)        | AHB22236         | Swine       | Canada         | 11/8/11     |
| 33 | A/swine/Mexico/SG1442/2010(H3N2)          | AHB22247         | Swine       | Mexico         | 11/29/10    |
| 34 | A/swine/Mexico/SG1443/2010(H1N1)          | AHB22258         | Swine       | Mexico         | 12/2/10     |

|    |                                         |          |       |        |          |
|----|-----------------------------------------|----------|-------|--------|----------|
| 35 | A/swine/Mexico/SG1444/2011(H3N2)        | AHB22566 | Swine | Mexico | 10/21/11 |
| 36 | A/swine/Mexico/SG1447/2011(H3N2)        | AHB24775 | Swine | Mexico | 10/21/11 |
| 37 | A/swine/Mexico/SG1448/2011(H3N2)        | AHB24786 | Swine | Mexico | 10/21/11 |
| 38 | A/swine/Mexico/SG1449/2011(H3N2)        | AHB22281 | Swine | Mexico | 10/21/11 |
| 39 | A/swine/Mexico/SG1450/2011(H1N1)        | AHB24797 | Swine | Mexico | 11/9/11  |
| 40 | A/swine/Minnesota/00352/2004(H1N1)      | AHB22770 | Swine | USA    | 7/23/04  |
| 41 | A/swine/Minnesota/00401/2004(H1N1)      | AHB22782 | Swine | USA    | 9/9/04   |
| 42 | A/swine/Minnesota/00938/2005(H1N1)      | AHB21002 | Swine | USA    | 12/30/05 |
| 43 | A/swine/Minnesota/00991/2006(H1N1)      | AHB21146 | Swine | USA    | 2/7/06   |
| 44 | A/swine/Minnesota/01136/2006(H1N1)      | AHB21134 | Swine | USA    | 5/11/06  |
| 45 | A/swine/Minnesota/01604/2007(H1N2)      | AHB21340 | Swine | USA    | 5/1/07   |
| 46 | A/swine/Minnesota/01882/2007(H1N1)      | AHB21316 | Swine | USA    | 12/5/07  |
| 47 | A/swine/Minnesota/3128/2010(H1N2)       | AHB21828 | Swine | USA    | 9/24/10  |
| 48 | A/swine/Minnesota/SG1133/2008(H1N2)     | AEO91822 | Swine | USA    | 4/28/08  |
| 49 | A/swine/Minnesota/SG1138/2002(H1N1)     | AEO91642 | Swine | USA    | 5/16/02  |
| 50 | A/swine/Minnesota/SG1144/2006(H1N1)     | AEO91854 | Swine | USA    | 5/19/06  |
| 51 | A/swine/Minnesota/SG1236/2005(H3N2)     | AHB20978 | Swine | USA    | 4/22/05  |
| 52 | A/swine/Minnesota/SG1238/2005(H3N2)     | AHB20990 | Swine | USA    | 6/2/05   |
| 53 | A/swine/Minnesota/SG1261/2006(H1N1)     | AHB22341 | Swine | USA    | 11/8/06  |
| 54 | A/swine/Minnesota/SG1293/2007(H3N2)     | AHB21352 | Swine | USA    | 4/6/07   |
| 55 | A/swine/Minnesota/SG1294/2007(H3N2)     | AHB21364 | Swine | USA    | 4/5/07   |
| 56 | A/swine/Minnesota/SG1317/2008(H1N1)     | AHB21555 | Swine | USA    | 4/17/08  |
| 57 | A/swine/Minnesota/SG1340/2009(H1N1)     | AHB21675 | Swine | USA    | 10/22/09 |
| 58 | A/swine/Minnesota/SG1454/2003(H1N1)     | AHB22614 | Swine | USA    | 10/2/03  |
| 59 | A/swine/Minnesota/SG1470/2004(H1N1)     | AHB22806 | Swine | USA    | 8/13/04  |
| 60 | A/swine/Nebraska/00178/2003(H1N1)       | AHB22590 | Swine | USA    | 8/29/03  |
| 61 | A/swine/Nebraska/00188/2003(H3N2)       | AHB22626 | Swine | USA    | 10/3/03  |
| 62 | A/swine/Nebraska/01711/2007(H3N2)       | AHB21328 | Swine | USA    | 7/31/07  |
| 63 | A/swine/North Carolina/00371/2004(H1N1) | AHB22698 | Swine | USA    | 10/7/04  |
| 64 | A/swine/North Carolina/00378/2004(H1N1) | AHB22746 | Swine | USA    | 8/3/04   |
| 65 | A/swine/North Carolina/00850/2005(H1N1) | AHB24809 | Swine | USA    | 11/8/05  |
| 66 | A/swine/North Carolina/00925/2005(H1N1) | AHB22914 | Swine | USA    | 12/13/05 |
| 67 | A/swine/North Carolina/01052/2006(H3N2) | AHB22962 | Swine | USA    | 3/14/06  |
| 68 | A/swine/North Carolina/01169/2006(H1N2) | AHB21086 | Swine | USA    | 6/22/06  |
| 69 | A/swine/North Carolina/01216/2006(H3N2) | AHB22986 | Swine | USA    | 8/16/06  |
| 70 | A/swine/North Carolina/01312/2006(H3N2) | AHB21098 | Swine | USA    | 11/16/06 |
| 71 | A/swine/North Carolina/01469/2007(H3N2) | AHB23010 | Swine | USA    | 2/21/07  |
| 72 | A/swine/North Carolina/01484/2006(H3N2) | AHB21110 | Swine | USA    | 11/3/06  |
| 73 | A/swine/North Carolina/01506/2006(H3N2) | AHB22950 | Swine | USA    | 10/31/06 |
| 74 | A/swine/North Carolina/01514/2007(H1N1) | AHB23034 | Swine | USA    | 1/26/07  |
| 75 | A/swine/North Carolina/01550/2007(H1N1) | AHB23046 | Swine | USA    | 4/4/07   |
| 76 | A/swine/North Carolina/01591/2007(H1N1) | AHB22998 | Swine | USA    | 4/24/07  |
| 77 | A/swine/North Carolina/01855/2007(H1N1) | AHB23022 | Swine | USA    | 11/14/07 |

|     |                                           |          |       |        |          |
|-----|-------------------------------------------|----------|-------|--------|----------|
| 78  | A/swine/North Carolina/01930/2007(H3N2)   | AHB21292 | Swine | USA    | 7/27/07  |
| 79  | A/swine/North Carolina/02249/2008(H1N2)   | AHB21471 | Swine | USA    | 7/30/08  |
| 80  | A/swine/North Carolina/02403/2008(H1N1)   | AHB21507 | Swine | USA    | 9/12/08  |
| 81  | A/swine/North Carolina/SG1197/2004(H3N2)  | AHB20855 | Swine | USA    | 12/30/04 |
| 82  | A/swine/North Carolina/SG1229/2005(H1N1)  | AHB23675 | Swine | USA    | 12/6/05  |
| 83  | A/swine/North Carolina/SG1230/2005(H3N2)  | AHB20966 | Swine | USA    | 3/16/05  |
| 84  | A/swine/North Carolina/SG1278/2007(H1N1)  | AHB21266 | Swine | USA    | 11/20/07 |
| 85  | A/swine/North Carolina/SG1281/2007(H1N1)  | AHB22353 | Swine | USA    | 2/1/07   |
| 86  | A/swine/North Carolina/SG1282/2007(mixed) | AHB21280 | Swine | USA    | 10/25/07 |
| 87  | A/swine/North Carolina/SG1306/2008(H3N2)  | AHB21447 | Swine | USA    | 7/3/08   |
| 88  | A/swine/North Carolina/SG1307/2008(H1N1)  | AHB22365 | Swine | USA    | 9/16/08  |
| 89  | A/swine/North Carolina/SG1309/2008(H1N1)  | AHB21483 | Swine | USA    | 10/23/08 |
| 90  | A/swine/North Carolina/SG1310/2008(H1N1)  | AHB21495 | Swine | USA    | 11/11/08 |
| 91  | A/swine/North Carolina/SG1313/2008(H1N1)  | AHB21519 | Swine | USA    | 9/26/08  |
| 92  | A/swine/North Carolina/SG1314/2008(H1N1)  | AHB21531 | Swine | USA    | 9/16/08  |
| 93  | A/swine/North Carolina/SG1361/2010(H1N1)  | AHB21781 | Swine | USA    | 6/18/10  |
| 94  | A/swine/North Carolina/SG1364/2010(H3N2)  | AHB24501 | Swine | USA    | 11/24/10 |
| 95  | A/swine/North Carolina/SG1462/2004(H3N2)  | AHB22710 | Swine | USA    | 3/3/04   |
| 96  | A/swine/North Carolina/SG1463/2004(H1N1)  | AHB22722 | Swine | USA    | 8/27/04  |
| 97  | A/swine/North Carolina/SG1464/2004(H3N2)  | AHB22734 | Swine | USA    | 3/10/04  |
| 98  | A/swine/North Carolina/SG1477/2005(H1N1)  | AHB22878 | Swine | USA    | 10/20/05 |
| 99  | A/swine/North Carolina/SG1478/2005(H1N1)  | AHB22890 | Swine | USA    | 5/5/05   |
| 100 | A/swine/North Carolina/SG1479/2005(H1N1)  | AHB22902 | Swine | USA    | 12/8/05  |
| 101 | A/swine/Oklahoma/00130/2003(H1N1)         | AHB23166 | Swine | USA    | 8/12/03  |
| 102 | A/swine/Oklahoma/00259/2004(H1N2)         | AHB22674 | Swine | USA    | 3/3/04   |
| 103 | A/swine/Oklahoma/00518/2005(H3N2)         | AHB22305 | Swine | USA    | 3/1/05   |
| 104 | A/swine/Oklahoma/00790/2005(H1N1)         | AHB22830 | Swine | USA    | 9/23/05  |
| 105 | A/swine/Oklahoma/00801/2005(H1N1)         | AHB22854 | Swine | USA    | 10/4/05  |
| 106 | A/swine/Oklahoma/SG1216/2005(H3N2)        | AHB20942 | Swine | USA    | 3/3/05   |
| 107 | A/swine/Oklahoma/SG1217/2005(H1N1)        | AHB20954 | Swine | USA    | 12/6/05  |
| 108 | A/swine/Oklahoma/SG1243/2006(H1N1)        | AHB21026 | Swine | USA    | 10/6/06  |
| 109 | A/swine/Oklahoma/SG1244/2006(H1N1)        | AHB21038 | Swine | USA    | 6/7/06   |
| 110 | A/swine/Oklahoma/SG1249/2006(H1N1)        | AHB23687 | Swine | USA    | 6/7/06   |
| 111 | A/swine/Oklahoma/SG1251/2010(H1N1)        | AHB21723 | Swine | USA    | 9/24/10  |
| 112 | A/swine/Oklahoma/SG1325/2009(H1N1)        | AHB21591 | Swine | USA    | 2/4/09   |
| 113 | A/swine/Oklahoma/SG1349/2010(H1N1)        | AHB22425 | Swine | USA    | 9/24/10  |
| 114 | A/swine/Oklahoma/SG1457/2004(H1N1)        | AHB22650 | Swine | USA    | 9/23/04  |
| 115 | A/swine/Oklahoma/SG1458/2004(H1N1)        | AHB22662 | Swine | USA    | 9/1/04   |
| 116 | A/swine/Oklahoma/SG1460/2004(H1N1)        | AHB22686 | Swine | USA    | 8/26/04  |
| 117 | A/swine/Oklahoma/SG1473/2005(H3N2)        | AHB22842 | Swine | USA    | 9/23/05  |
| 118 | A/swine/Quebec/01001/2006(H3N2)           | AHB22092 | Swine | Canada | 2/23/06  |
| 119 | A/swine/Quebec/01002/2006(H3N2)           | AHB24707 | Swine | Canada | 2/23/06  |
| 120 | A/swine/Saskatchewan/01114/2006(H3N2)     | AHB22104 | Swine | Canada | 5/1/06   |

|     |                                         |          |       |        |          |
|-----|-----------------------------------------|----------|-------|--------|----------|
| 121 | A/swine/Saskatchewan/01974/2008(H1N1)   | AHB24744 | Swine | Canada | 1/8/08   |
| 122 | A/swine/Saskatchewan/02903/2009(H3N2)   | AHB22224 | Swine | Canada | 9/24/09  |
| 123 | A/swine/Saskatchewan/SD0001/2011(H3N2)  | AHB22543 | Swine | Canada | 12/1/11  |
| 124 | A/swine/South Carolina/01414/2006(H1N1) | AHB22974 | Swine | USA    | 12/19/06 |
| 125 | A/swine/South Dakota/SG1453/2003(H3N2)  | AHB22602 | Swine | USA    | 4/10/03  |
| 126 | A/swine/Tennessee/00264/2004(H1N1)      | AHB20867 | Swine | USA    | 3/11/04  |
| 127 | A/swine/Texas/00244/2004(H1N1)          | AHB22638 | Swine | USA    | 2/4/04   |
| 128 | A/swine/Texas/00376/2004(H3N2)          | AHB23193 | Swine | USA    | 7/22/04  |
| 129 | A/swine/Texas/00816/2005(H3N2)          | AHB22866 | Swine | USA    | 10/12/05 |
| 130 | A/swine/Texas/00867/2005(H1N1)          | AHB22818 | Swine | USA    | 11/17/05 |
| 131 | A/swine/Texas/01308/2006(H1N2)          | AHB21050 | Swine | USA    | 11/2/06  |
| 132 | A/swine/Texas/01492/2007(H1N2)          | AHB21230 | Swine | USA    | 3/8/07   |
| 133 | A/swine/Texas/01522/2007(H1N1)          | AHB21182 | Swine | USA    | 3/13/07  |
| 134 | A/swine/Texas/01657/2007(H1N1)          | AHB21218 | Swine | USA    | 6/21/07  |
| 135 | A/swine/Texas/01822/2007(H3N1)          | AHB21206 | Swine | USA    | 10/25/07 |
| 136 | A/swine/Texas/SG1186/2004(H3N2)         | AHB20833 | Swine | USA    | 10/22/04 |
| 137 | A/swine/Texas/SG1250/2006(H1N2)         | AHB21062 | Swine | USA    | 6/21/06  |
| 138 | A/swine/Texas/SG1270/2007(H3N2)         | AHB23744 | Swine | USA    | 3/1/07   |
| 139 | A/swine/Texas/SG1271/2007(H1N1)         | AHB21194 | Swine | USA    | 10/25/07 |
| 140 | A/swine/Texas/SG1380/2011(H1N1)         | AHB24562 | Swine | USA    | 10/6/11  |
| 141 | A/swine/Texas/SG1501/2010(H3N2)         | AHB23154 | Swine | USA    | 4/20/10  |

**Table S2. Whole-genome swIAV sequence data.** GenBank accession numbers (PB2 segment), country and date of collection, and phylogenetic position of the HA, NA, and PB2 for all whole-genome sequences from swine influenza viruses that have at least one segment that is related to human seasonal viruses. Numbers refer to the introductions listed in Table 1.

| <b>Virus name</b>                          | <b>Accession</b> | <b>Country</b> | <b>Date</b> | <b>HA</b> | <b>NA</b> | <b>PB2</b> |
|--------------------------------------------|------------------|----------------|-------------|-----------|-----------|------------|
| A/swine/Alabama/A01104056/2012/mixed       | AGL51625         | USA            | 12/12/12    | H3-2      | N2-5      | trig       |
| A/swine/Alberta/00805/2005/H3N2            | AHB22080         | Canada         | 10/10/05    | H3-2      | N2-5      | trig       |
| A/swine/Alberta/14722/2005/H3N2            | ABF18003         | Canada         | 2005        | H3-2      | N2-5      | trig       |
| A/swine/Alberta/SG1405/2005/H3N2           | AHB22068         | Canada         | 10/7/05     | H3-2      | N2-5      | trig       |
| A/swine/Altenberge/IDT14252/2011/H1N2      | AGA19212         | Germany        | 11/17/11    | pdm-H1    | N2-10     | pdm        |
| A/swine/Althausen/IDT14031/2011/H1N2       | AGA19252         | Germany        | 10/2/11     | pdm-H1    | N2-10     | pdm        |
| A/swine/Ankum-Stockum/IDT13531/2011/H1N2   | AGA19292         | Germany        | 6/16/11     | pdm-H1    | N2-10     | pdm        |
| A/swine/Aomori/1/2005/H1N2                 | BAK22655         | Japan          | 2005        | class-H1  | N2-13     | class      |
| A/swine/Argentina/CIP051-A160/2011/H3N2    | AGK62744         | Argentina      | 2011/04     | H3-18     | N2-18     | pdm        |
| A/swine/Argentina/CIP051-A2/2008/H3N2      | AEI60106         | Argentina      | 2008/11     | H3-18     | N2-18     | human      |
| A/swine/Argentina/CIP051-BsAs76/2009/H1N1  | ADO65958         | Argentina      | 2009/10     | H1-20     | N1-20     | pdm        |
| A/swine/Argentina/CIP051-StaFeN2/2010/H1N2 | ADO65968         | Argentina      | 2010/05     | H1-19     | N2-19     | pdm        |
| A/swine/Arkansas/02927/2009/H1N2           | AHB23082         | USA            | 12/2/09     | H1-7      | N2-5      | trig       |
| A/swine/Arkansas/SG1295/2008/H3N2          | AHB21376         | USA            | 5/15/08     | H3-2      | N2-5      | trig       |
| A/swine/Arkansas/SG1297/2008/H3N2          | AHB21388         | USA            | 10/15/08    | H3-2      | N2-5      | trig       |
| A/swine/Arkansas/SG1298/2008/H3N2          | AHB21400         | USA            | 12/30/08    | H3-2      | N2-5      | trig       |
| A/swine/Arkansas/SG1377/2011/H1N2          | AHB21864         | USA            | 4/29/11     | H1-6      | N2-5      | trig       |
| A/swine/Arkansas/SG1382/2011/H1N2          | AHB24586         | USA            | 6/14/11     | H1-6      | N2-5      | trig       |
| A/swine/Bakum/1832/2000/H1N2               | ABS53370         | Germany        | 2000        | H1-11     | N2-9      | euras      |
| A/swine/Bakum/IDT1769/2003/H3N2            | ACR39216         | Germany        | 3/7/03      | H3-10     | N2-10     | euras      |
| A/swine/BinhDuong/02-16/2010/H1N2          | BAM65743         | Viet Nam       | 2010        | H1-17     | N2-16     | trig       |
| A/swine/BinhDuong/03-06/2010/H3N2          | BAK41869         | Viet Nam       | 2010/02     | H3-16     | N2-16     | trig       |
| A/swine/BinhDuong/03-08/2010/H3N2          | BAK41870         | Viet Nam       | 2010/02     | H3-16     | N2-16     | trig       |
| A/swine/BinhDuong/03-09/2010/H3N2          | BAK41871         | Viet Nam       | 2010/02     | H3-16     | N2-16     | trig       |
| A/swine/BinhDuong/03-10/2010/H3N2          | BAK41872         | Viet Nam       | 2010/02     | H3-16     | N2-16     | trig       |
| A/swine/BinhDuong/03-13/2010/H3N2          | BAK41873         | Viet Nam       | 2010/02     | H3-16     | N2-16     | trig       |
| A/swine/BinhDuong/03-14/2010/H3N2          | BAK41874         | Viet Nam       | 2010/02     | H3-16     | N2-16     | trig       |
| A/swine/Brabant/1984/H3N2                  | ADT79178         | Netherlands    | 1984        | H3-10     | N2-10     | euras      |
| A/swine/BritishColumbia/00633/2005/H3N2    | AHB22056         | Canada         | 5/19/05     | H3-2      | N2-5      | trig       |
| A/swine/BritishColumbia/28103/2005/H3N2    | ABF18004         | Canada         | 2005        | H3-2      | N2-5      | trig       |
| A/swine/Chachoengsao/2003/H3N2             | BAH02097         | Thailand       | 2003        | H3-10     | N2-10     | euras      |
| A/swine/Chonburi/NIAH106952-               | BAM62968         | Thailand       | 2011/02     | H3-15     | N2-15     | pdm        |



## 026/2011/H3N2

|                                           |          |          |          |          |       |       |
|-------------------------------------------|----------|----------|----------|----------|-------|-------|
| A/swine/Chonburi/NIAH106952-028/2011/H3N2 | BAM62978 | Thailand | 2011/02  | H3-15    | N2-15 | pdm   |
| A/swine/Cloppenburg/IDT4777/2005/H1N2     | ABS53360 | Germany  | 12/13/05 | H1-11    | N2-10 | euras |
| A/swine/Doetlingen/IDT4735/2005/H1N2      | ABS53350 | Germany  | 12/7/05  | H1-11    | N2-10 | euras |
| A/swine/Duelmen/IDT14128/2011/H1N2        | AGA19242 | Germany  | 10/27/11 | pdm-H1   | N2-10 | pdm   |
| A/swine/Ehime/1/1980/H1N2                 | BAH02167 | Japan    | 1980     | class-H1 | N2-13 | class |
| A/swine/England/00003/2009/H1N2           | AFR75888 | UK       | 1/12/09  | H1-12    | N2-9  | euras |
| A/swine/England/002295/2002/H1N2          | AFR75910 | UK       | 12/4/02  | H1-11    | N2-9  | euras |
| A/swine/England/1382/2010/H1N2            | ADX31842 | UK       | 4/13/10  | H1-11    | N2-9  | pdm   |
| A/swine/England/303/2009/H1N2             | AFR76169 | UK       | 4/9/09   | H1-11    | N2-9  | euras |
| A/swine/England/375017/1993/H3N2          | AFR76212 | UK       | 10/24/93 | H3-9     | N2-9  | euras |
| A/swine/England/40280/1996/H1N2           | AFR76245 | UK       | 7/9/96   | H1-11    | N2-9  | euras |
| A/swine/England/425069/1994/H3N2          | AFR76267 | UK       | 2/7/94   | H3-9     | N2-9  | euras |
| A/swine/England/43142/2001/H1N2           | AFR76288 | UK       | 12/21/01 | H1-11    | N2-9  | euras |
| A/swine/England/448813/1994/H1N2          | AFR76297 | UK       | 4/24/94  | H1-11    | N2-9  | euras |
| A/swine/England/483/2006/H1N2             | AFR76318 | UK       | 5/12/06  | H1-11    | N2-9  | euras |
| A/swine/England/60797/2000/H1N2           | AFR76340 | UK       | 12/22/00 | H1-11    | N2-9  | euras |
| A/swine/England/61605/1998/H1N2           | AFR76359 | UK       | 11/18/98 | H1-11    | N2-9  | euras |
| A/swine/England/645913/1996/H1N2          | AFR76381 | UK       | 12/20/96 | H1-11    | N2-9  | euras |
| A/swine/England/661263/1997/H1N2          | AFR76392 | UK       | 2/11/97  | H1-11    | N2-9  | euras |
| A/swine/England/87842/1990/H3N2           | AFR76456 | UK       | 8/6/90   | H3-9     | N2-9  | human |
| A/swine/England/88761/1997/H1N2           | AFR76467 | UK       | 2/3/97   | H1-11    | N2-9  | euras |
| A/swine/England/90591/1997/H3N2           | AFR76478 | UK       | 2/10/97  | H3-9     | N2-9  | euras |
| A/swine/England/P185/2008/H1N2            | AFU83142 | UK       | 12/25/08 | H1-11    | N2-9  | euras |
| A/swine/Freren/IDT13837-1/2011/H1N2       | AGA19272 | Germany  | 8/31/11  | pdm-H1   | N2-10 | pdm   |
| A/swine/Freren/IDT13837-2/2011/H1N2       | AGA19262 | Germany  | 8/31/11  | pdm-H1   | N2-10 | pdm   |
| A/swine/Gent/100/2007/H1N2                | AFR76597 | Belgium  | 2007     | H1-11    | N2-9  | euras |
| A/swine/Gent/177/2002/H1N2                | AFR76630 | Belgium  | 2002     | H1-11    | N2-9  | euras |
| A/swine/Gent/96/2007/H3N2                 | AFR76641 | Belgium  | 2007     | H3-10    | N2-10 | euras |
| A/swine/Granstedt/IDT3475/2004/H1N2       | ACR39218 | Germany  | 8/26/04  | H1-11    | N2-9  | euras |
| A/swine/Guangdong/1/2010/H1N2             | ADV19282 | China    | 1/30/10  | class-H1 | N2-1  | trig  |
| A/swine/Guangdong/1222/2006/H1N2          | ACY06511 | China    | 2006     | class-H1 | N2-1  | trig  |
| A/swine/Guangdong/2670/2010/H1N2          | AEK86185 | China    | 8/26/10  | class-H1 | N2-1  | trig  |
| A/swine/Guangdong/2676/2010/H1N2          | AEK86186 | China    | 8/26/10  | class-H1 | N2-1  | trig  |
| A/swine/Guangdong/2693/2010/H1N2          | AEK86187 | China    | 8/26/10  | class-H1 | N2-1  | trig  |
| A/swine/Guangdong/2712/2010/H1N2          | AEK86188 | China    | 8/26/10  | class-H1 | N2-1  | trig  |
| A/swine/Guangdong/553/2010/H1N2           | AEK86179 | China    | 2/27/10  | class-H1 | N2-14 | euras |
| A/swine/Guangdong/603/2010/H1N2           | AEK86180 | China    | 2/27/10  | class-H1 | N2-14 | euras |
| A/swine/Guangdong/606/2010/H1N2           | AEK86181 | China    | 2/27/10  | class-H1 | N2-14 | euras |
| A/swine/Guangdong/617/2010/H1N2           | AEK86182 | China    | 2/27/10  | class-H1 | N2-14 | euras |
| A/swine/Guangdong/628/2010/H1N2           | AEK86183 | China    | 2/27/10  | class-H1 | N2-14 | euras |
| A/swine/Guangxi/13/2006/H1N2              | ABR87897 | China    | 2006     | class-H1 | N2-1  | trig  |

|                                       |          |           |          |          |       |       |
|---------------------------------------|----------|-----------|----------|----------|-------|-------|
| A/swine/Guangxi/NS2783/2010/H3N2      | AEX30557 | China     | 11/7/10  | H3-16    | N2-16 | pdm   |
| A/swine/Gunma/1/2012/H1N2             | BAN37209 | Japan     | 1/13/12  | pdm-H1   | N2-13 | pdm   |
| A/swine/Hebei/10/2006/H1N2            | ADU02124 | China     | 2006/10  | class-H1 | N2-1  | trig  |
| A/swine/Henan/4/2010/H1N2             | AEX30528 | China     | 2010/12  | class-H1 | N2-1  | pdm   |
| A/swine/Henan/YIL/2010/H1N2           | AFH77150 | China     | 2010/12  | class-H1 | N2-1  | pdm   |
| A/swine/HongKong/1102/2003/H1N2       | ADY71208 | Hong Kong | 8/14/03  | class-H1 | N2-14 | class |
| A/swine/HongKong/1110/2006/H1N2       | ACR84055 | Hong Kong | 8/1/06   | class-H1 | N2-1  | trig  |
| A/swine/HongKong/1248/2002/H1N2       | ADY71133 | Hong Kong | 9/9/02   | class-H1 | N2-14 | class |
| A/swine/HongKong/1382/2003/H1N2       | ADY71230 | Hong Kong | 10/16/03 | class-H1 | N2-14 | class |
| A/swine/HongKong/1435/2009/H1N2       | ADG08227 | Hong Kong | 7/23/09  | class-H1 | N2-1  | trig  |
| A/swine/HongKong/1479/2009/H1N2       | ADG08238 | Hong Kong | 7/23/09  | class-H1 | N2-1  | euras |
| A/swine/HongKong/1562/2005/H1N2       | ACR84050 | Hong Kong | 11/11/05 | class-H1 | N2-1  | trig  |
| A/swine/HongKong/1763/2003/H1N2       | ADY71251 | Hong Kong | 12/15/03 | class-H1 | N2-14 | class |
| A/swine/HongKong/2237/2010/H1N2       | AEK86184 | Hong Kong | 8/2/10   | class-H1 | N2-1  | trig  |
| A/swine/HongKong/2503/2011/H3N2       | AEX30537 | Hong Kong | 6/16/11  | H3-16    | N2-16 | pdm   |
| A/swine/HongKong/554/2003/H1N2        | ACR84048 | Hong Kong | 4/24/03  | class-H1 | N2-14 | class |
| A/swine/HongKong/NS13/2002/H1N2       | ADY71083 | Hong Kong | 1/21/02  | class-H1 | N2-14 | class |
| A/swine/HongKong/NS2439/2011/H3N2     | AEX30547 | Hong Kong | 6/16/11  | H3-16    | N2-16 | pdm   |
| A/swine/HongKong/NS605/2003/H1N2      | ADY71197 | Hong Kong | 7/10/03  | class-H1 | N2-14 | class |
| A/swine/HongKong/NS728/2002/H1N2      | ADY71123 | Hong Kong | 8/13/02  | class-H1 | N2-14 | class |
| A/swine/HongKong/NS915/2004/H1N2      | ADY71336 | Hong Kong | 10/14/04 | class-H1 | N2-14 | class |
| A/swine/Hubei/04/2009/H1N2            | AEH42770 | China     | 3/10/09  | class-H1 | N2-1  | trig  |
| A/swine/Hubei/05/2009/H1N2            | AEH42781 | China     | 3/10/09  | class-H1 | N2-1  | trig  |
| A/swine/Illinois/00303/2004/H3N2      | AHB20891 | USA       | 5/18/04  | H3-2     | N2-5  | trig  |
| A/swine/Illinois/01131/2006/H3N2      | AHB21158 | USA       | 5/5/06   | H3-2     | N2-5  | trig  |
| A/swine/Illinois/02907/2009/H3N2      | AHA11532 | USA       | 10/21/09 | H3-2     | N2-5  | trig  |
| A/swine/Illinois/53612-2/2009/H3N2    | AFV71382 | USA       | 8/20/09  | H3-2     | N2-5  | trig  |
| A/swine/Illinois/53612-3/2009/H3N2    | AFV71375 | USA       | 9/21/09  | H3-2     | N2-5  | trig  |
| A/swine/Illinois/A00857304a/2012/H3N2 | AFH41256 | USA       | 1/5/12   | H3-2     | N2-5  | trig  |
| A/swine/Illinois/A00857325/2012/H1N2  | AGU69979 | USA       | 6/14/12  | H1-6     | N2-5  | trig  |
| A/swine/Illinois/A01047528/2010/H3N2  | AEZ01205 | USA       | 12/2/10  | H3-2     | N2-5  | trig  |
| A/swine/Illinois/A01049968/2011/H1N2  | AFL56898 | USA       | 5/11/11  | H1-6     | N2-5  | trig  |
| A/swine/Illinois/A01057087/2010/H3N2  | AFK73198 | USA       | 4/28/10  | H3-2     | N2-5  | trig  |
| A/swine/Illinois/A01202825/2011/H3N2  | AFM84250 | USA       | 11/9/11  | H3-2     | N2-1  | trig  |

|                                       |          |       |          |          |          |       |
|---------------------------------------|----------|-------|----------|----------|----------|-------|
| A/swine/Illinois/A01243094/2012/H1N2  | AFX69020 | USA   | 1/30/12  | H1-6     | N2-5     | trig  |
| A/swine/Illinois/A01244402/2012/H3N2  | AGT41768 | USA   | 12/5/12  | H3-2     | N2-5     | trig  |
| A/swine/Illinois/A01301796/2012/H1N2  | AGG53692 | USA   | 9/10/12  | H1-6     | N2-5     | trig  |
| A/swine/Illinois/A01432127/2012/H3N2  | AGS41556 | USA   | 10/29/12 | H3-2     | N2-5     | trig  |
| A/swine/IN/PU542/04/H3N1              | ABA27437 | USA   | 2004     | H3-2     | class-N1 | trig  |
| A/swine/Indiana/00427/2004/H1N2       | AEO91756 | USA   | 11/2/04  | class-H1 | N2-1     | trig  |
| A/swine/Indiana/13TOSU1128/2013/H3N2  | AGY42395 | USA   | 7/25/13  | H3-2     | N2-5     | trig  |
| A/swine/Indiana/A00968376/2012/H3N2   | AFR61010 | USA   | 7/13/12  | H3-2     | N2-5     | trig  |
| A/swine/Indiana/A01049744/2011/H3N2   | AFI73493 | USA   | 3/23/11  | H3-2     | N2-5     | trig  |
| A/swine/Indiana/A01049953/2011/H1N2   | AFL56884 | USA   | 5/7/11   | H1-6     | N2-5     | trig  |
| A/swine/Indiana/A01260254/2013/H3N2   | AGS41548 | USA   | 3/20/13  | H3-2     | N2-5     | trig  |
| A/swine/Indiana/A01260313/2013/H3N2   | AGS09004 | USA   | 6/21/13  | H3-2     | N2-5     | trig  |
| A/swine/Iowa/00186/2003/H3N2          | AHB22578 | USA   | 10/2/03  | H3-2     | N2-1     | trig  |
| A/swine/Iowa/13C019/2013/H3N2         | AHA98565 | USA   | 3/26/13  | H3-2     | N2-5     | trig  |
| A/swine/Iowa/13C020/2013/H3N2         | AHA98576 | USA   | 3/26/13  | H3-2     | N2-5     | trig  |
| A/swine/Iowa/13C038/2013/H3N2         | AHA98554 | USA   | 3/26/13  | H3-2     | N2-5     | trig  |
| A/swine/Iowa/13C040/2013/H3N2         | AHA98598 | USA   | 3/26/13  | H3-2     | N2-5     | trig  |
| A/swine/Iowa/A01049032/2010/H3N2      | AFI73451 | USA   | 11/16/10 | H3-2     | N2-5     | trig  |
| A/swine/Iowa/A01049036/2010/H3N2      | AFD32623 | USA   | 11/16/10 | H3-2     | N2-5     | trig  |
| A/swine/Iowa/A01049160/2010/H3N2      | AFM84223 | USA   | 11/30/10 | H3-2     | N2-5     | trig  |
| A/swine/Iowa/A01049970/2011/H1N2      | AFL56906 | USA   | 5/16/11  | H1-6     | N2-5     | trig  |
| A/swine/Iowa/A01203121/2012/H3N2      | AFM84270 | USA   | 1/5/12   | H3-2     | N2-1     | trig  |
| A/swine/Iowa/A01203942/2012/H3N2      | AGC96260 | USA   | 10/2/12  | H3-2     | N2-5     | trig  |
| A/swine/Iowa/A01243311/2012/H3N2      | AGS42021 | USA   | 4/23/12  | H3-2     | N2-5     | trig  |
| A/swine/Iowa/A01432034/2012/H1N2      | AGN51201 | USA   | 10/11/12 | H1-6     | N2-5     | trig  |
| A/swine/Iowa/H02AS8/2002/H3N2         | ACY67070 | USA   | 2002/11  | H3-2     | N2-1     | trig  |
| A/swine/Iowa/H03HB4/2003/H3N2         | ACY67067 | USA   | 2003/02  | H3-2     | N2-1     | trig  |
| A/swine/Iowa/H03HO7/2003/H3N2         | ACY67066 | USA   | 2003/06  | H3-2     | N2-1     | trig  |
| A/swine/Iowa/H03LDH5/2003/H3N2        | ACY67064 | USA   | 2003/08  | H3-4     | N2-4     | trig  |
| A/swine/Iowa/SG1469/2004/H3N2         | AHB22794 | USA   | 10/14/04 | H3-2     | N2-5     | trig  |
| A/swine/Italy/15360-3/2001/H3N2       | AFR76674 | Italy | 2001     | H3-10    | N2-10    | euras |
| A/swine/Italy/172336/2001/H1N1        | AFR76692 | Italy | 2001     | H1-11    | eur-N1   | euras |
| A/swine/Italy/272121-1/2002/H3N2      | AFR76714 | Italy | 2002     | H3-10    | N2-10    | euras |
| A/swine/Italy/71251/2005/H1N2         | AFR76746 | Italy | 2005     | H1-11    | N2-9     | euras |
| A/swine/Kansas/00246/2004/H1N2        | AHB22293 | USA   | 2/5/04   | class-H1 | N2-1     | trig  |
| A/swine/Kansas/015252/2009/H3N2       | ACV42080 | USA   | 2009     | H3-2     | N2-5     | trig  |
| A/swine/Kansas/10-91088/2010/H3N2     | AEL31731 | USA   | 12/30/10 | H3-2     | N2-1     | trig  |
| A/swine/Kansas/11-107824/2011/H3N2    | AEL31735 | USA   | 3/18/11  | H3-2     | N2-1     | pdm   |
| A/swine/Kansas/11-109700/2011/H3N2    | AEL31736 | USA   | 4/2/11   | H3-2     | N2-1     | trig  |
| A/swine/Kentucky/12TOSU1052/2012/H1N2 | AGK62581 | USA   | 11/5/12  | H1-6     | N2-5     | trig  |
| A/swine/Kentucky/12TOSU1053/2012/H1N2 | AGK62629 | USA   | 11/5/12  | H1-6     | N2-5     | trig  |
| A/swine/Kentucky/SG1118/2003/mixed    | AEO91609 | USA   | 7/22/03  | class-H1 | N2-5     | trig  |

|                                         |          |         |          |          |          |      |
|-----------------------------------------|----------|---------|----------|----------|----------|------|
| A/swine/Korea/1130/2009/H1N2            | AFR75832 | S Korea | 2009/01  | class-H1 | N2-1     | trig |
| A/swine/Korea/1204/2009/H1N2            | AFR75843 | S Korea | 2009/02  | class-H1 | N2-1     | trig |
| A/swine/Korea/A18/2011/H3N2             | AFR42698 | S Korea | 2011/09  | H3-2     | N2-5     | trig |
| A/swine/Korea/CY02-07/2012/H3N1         | AGE83937 | S Korea | 2/7/12   | H3-2     | pdm-N1   | pdm  |
| A/swine/Korea/CY02-08/2012/H3N1         | AGE83926 | S Korea | 2/7/12   | H3-2     | pdm-N1   | pdm  |
| A/swine/Korea/CY02-09/2012/H3N2         | AGE83915 | S Korea | 2/7/12   | H3-2     | N2-5     | trig |
| A/swine/Korea/CY02-10/2012/H3N2         | AGE83904 | S Korea | 2/20/12  | H3-2     | N2-5     | trig |
| A/swine/Korea/CY03-11/2012/H1N2         | AGE83893 | S Korea | 3/6/12   | class-H1 | N2-1     | trig |
| A/swine/Korea/CY03-13/2012/H3N1         | AGE83872 | S Korea | 3/6/12   | H3-2     | pdm-N1   | pdm  |
| A/swine/Korea/CY03-14/2012/H3N2         | AGE83861 | S Korea | 3/6/12   | H3-2     | N2-5     | trig |
| A/swine/Korea/CY03-15/2012/H3N2         | AGE83850 | S Korea | 3/6/12   | H3-2     | N2-5     | trig |
| A/swine/Korea/CY03-16/2012/H3N2         | AGE83839 | S Korea | 3/27/12  | H3-2     | N2-5     | trig |
| A/swine/Korea/CY03-17/2012/H3N2         | AGE83828 | S Korea | 3/27/12  | H3-2     | N2-5     | trig |
| A/swine/Korea/CY03-18/2012/H3N2         | AGE83817 | S Korea | 3/27/12  | H3-2     | N2-5     | trig |
| A/swine/Korea/CY03-19/2012/H3N2         | AGE83806 | S Korea | 3/27/12  | H3-2     | N2-5     | trig |
| A/swine/Korea/CY0423-12/2013/H1N2       | AGN28819 | S Korea | 4/23/13  | eur-H1   | N2-1     | trig |
| A/swine/Korea/CY0423-33/2013/H1N2       | AGN28807 | S Korea | 4/23/13  | eur-H1   | N2-1     | trig |
| A/swine/Korea/CY12-03/2011/H1N2         | AGE83978 | S Korea | 12/5/11  | class-H1 | N2-1     | trig |
| A/swine/Korea/D79/2011/H3N2             | AFR42699 | S Korea | 2011/10  | H3-2     | N2-5     | trig |
| A/swine/Korea/KSB/2012/H3N2             | AFR42697 | S Korea | 2012/03  | H3-2     | N2-5     | trig |
| A/swine/Korea/PL01/2012/H3N2            | AGS08992 | S Korea | 4/23/12  | H3-2     | N2-5     | trig |
| A/swine/Langefoerden/IDT14189/2011/H1N2 | AGA19222 | Germany | 11/9/11  | pdm-H1   | N2-10    | pdm  |
| A/swine/Manitoba/00446/2005/H3N2        | AHB22495 | Canada  | 1/25/05  | H3-2     | N2-5     | trig |
| A/swine/Manitoba/01179/2006/H3N2        | AHB22116 | Canada  | 6/29/06  | H3-2     | N2-5     | trig |
| A/swine/Manitoba/01642/2007/H3N2        | AHB22128 | Canada  | 6/20/07  | H3-2     | N2-5     | trig |
| A/swine/Manitoba/01643/2007/H3N2        | AHB22140 | Canada  | 6/20/07  | H3-2     | N2-5     | trig |
| A/swine/Manitoba/01782/2007/H3N2        | AHB22164 | Canada  | 10/3/07  | H3-2     | N2-5     | trig |
| A/swine/Manitoba/02182/2008/H3N2        | AHB22176 | Canada  | 5/30/08  | H3-2     | N2-5     | trig |
| A/swine/Manitoba/02862/2009/H3N2        | AHB22212 | Canada  | 7/1/09   | H3-2     | N2-5     | trig |
| A/swine/Manitoba/12707/2005/H3N2        | ABF18005 | Canada  | 2005     | H3-2     | N2-5     | trig |
| A/swine/Manitoba/SG1431/2008/H3N2       | AHB22188 | Canada  | 6/17/08  | H3-2     | N2-5     | trig |
| A/swine/Manitoba/SG1432/2008/H3N2       | AHB22200 | Canada  | 6/17/08  | H3-2     | N2-5     | trig |
| A/swine/Manitoba/SG1438/2011/H3N2       | AHB22236 | Canada  | 11/8/11  | H3-2     | N2-5     | pdm  |
| A/swine/Mexico/SG1442/2010/H3N2         | AHB22247 | Mexico  | 11/29/10 | H3-2     | N2-5     | pdm  |
| A/swine/Mexico/SG1444/2011/H3N2         | AHB22566 | Mexico  | 10/21/11 | H3-2     | N2-5     | trig |
| A/swine/Mexico/SG1447/2011/H3N2         | AHB24775 | Mexico  | 10/21/11 | H3-2     | N2-5     | pdm  |
| A/swine/Mexico/SG1448/2011/H3N2         | AHB24786 | Mexico  | 10/21/11 | H3-2     | N2-5     | pdm  |
| A/swine/Mexico/SG1449/2011/H3N2         | AHB22281 | Mexico  | 10/21/11 | H3-2     | N2-5     | pdm  |
| A/swine/MI/PU243/04/H3N1                | ABA27429 | USA     | 2004     | H3-2     | class-N1 | trig |
| A/swine/Minnesota/001332/2006/H3N2      | AEO91898 | USA     | 11/17/06 | H3-2     | N2-5     | trig |

|                                          |          |          |          |          |       |       |
|------------------------------------------|----------|----------|----------|----------|-------|-------|
| A/swine/Minnesota/001444/2007/H3N2       | AEO91876 | USA      | 1/19/07  | H3-2     | N2-5  | trig  |
| A/swine/Minnesota/00484/2005/H3N2        | AEO91920 | USA      | 1/20/05  | H3-2     | N2-5  | trig  |
| A/swine/Minnesota/00611/2005/H3N2        | AEO91778 | USA      | 5/20/05  | H3-2     | N2-5  | trig  |
| A/swine/Minnesota/00709/2005/H3N2        | AEO91666 | USA      | 8/18/05  | H3-2     | N2-5  | trig  |
| A/swine/Minnesota/01146/2006/H3N2        | AEO91631 | USA      | 5/25/06  | H3-2     | N2-5  | trig  |
| A/swine/Minnesota/01604/2007/H1N2        | AHB21340 | USA      | 5/1/07   | H1-6     | N2-1  | trig  |
| A/swine/Minnesota/01862/2007/H3N2        | AEO91734 | USA      | 11/20/07 | H3-2     | N2-5  | trig  |
| A/swine/Minnesota/02324/2008/H1N2        | AEO91865 | USA      | 9/10/08  | H1-6     | N2-5  | trig  |
| A/swine/Minnesota/07002083/2007/H1N1     | ACL79902 | USA      | 2007     | H1-7     | N1-7  | trig  |
| A/swine/Minnesota/0745/2010/H1N2         | AEV21641 | USA      | 3/3/10   | H1-6     | N2-5  | trig  |
| A/swine/Minnesota/1145/2007/H3N2         | ACJ03974 | USA      | 2007     | H3-2     | N2-5  | trig  |
| A/swine/Minnesota/1192/2001/H1N2         | AEN94816 | USA      | 2001     | class-H1 | N2-1  | trig  |
| A/swine/Minnesota/1300/2007/H3N2         | ADZ05631 | USA      | 1/31/07  | H3-2     | N2-5  | trig  |
| A/swine/Minnesota/3128/2010/H1N2         | AHB21828 | USA      | 9/24/10  | H1-6     | N2-5  | trig  |
| A/swine/Minnesota/5763/2003/H1N2         | AEN94849 | USA      | 2003     | class-H1 | N2-1  | trig  |
| A/swine/Minnesota/578/2007/H3N2          | ADZ05629 | USA      | 1/24/07  | H3-2     | N2-5  | trig  |
| A/swine/Minnesota/593/99/H3N2            | AAG01793 | USA      | 1999     | H3-1     | N2-1  | trig  |
| A/swine/Minnesota/5947/2007/H3N2         | ADZ05632 | USA      | 2/20/07  | H3-2     | N2-5  | trig  |
| A/swine/Minnesota/65767/2006/H3N2        | ADZ05634 | USA      | 12/26/06 | H3-2     | N2-5  | trig  |
| A/swine/Minnesota/66853/2006/H3N2        | ADZ05635 | USA      | 12/26/06 | H3-2     | N2-5  | trig  |
| A/swine/Minnesota/66960/2006/H3N2        | ADZ05636 | USA      | 12/26/06 | H3-2     | N2-5  | trig  |
| A/swine/Minnesota/761/2007/H3N2          | ADZ05630 | USA      | 2007     | H3-2     | N2-5  | trig  |
| A/swine/Minnesota/7931/2007/H3N2         | ADZ05633 | USA      | 2/28/07  | H3-2     | N2-5  | trig  |
| A/swine/Minnesota/A01240127/2011/H3N2    | AGB84982 | USA      | 10/10/11 | H3-2     | N2-1  | trig  |
| A/swine/Minnesota/SG1133/2008/H1N2       | AEO91822 | USA      | 4/28/08  | H1-6     | N2-5  | trig  |
| A/swine/Minnesota/SG1236/2005/H3N2       | AHB20978 | USA      | 4/22/05  | H3-2     | N2-5  | trig  |
| A/swine/Minnesota/SG1238/2005/H3N2       | AHB20990 | USA      | 6/2/05   | H3-2     | N2-5  | trig  |
| A/swine/Minnesota/SG1293/2007/H3N2       | AHB21352 | USA      | 4/6/07   | H3-2     | N2-5  | trig  |
| A/swine/Minnesota/SG1294/2007/H3N2       | AHB21364 | USA      | 4/5/07   | H3-2     | N2-5  | trig  |
| A/swine/Missouri/A01270665/2012/H1N2     | AGS41660 | USA      | 10/2/12  | H1-6     | N2-5  | trig  |
| A/swine/Miyazaki/1/2006/H1N2             | BAG49628 | Japan    | 2006     | class-H1 | N2-13 | class |
| A/swine/Nakhonpathom/NIAH586-1/2005/H3N2 | BAH02117 | Thailand | 2005     | H3-9     | N2-9  | euras |
| A/swine/Nebraska/00188/2003/H3N2         | AHB22626 | USA      | 10/3/03  | H3-3     | N2-3  | trig  |
| A/swine/Nebraska/01711/2007/H3N2         | AHB21328 | USA      | 7/31/07  | H3-2     | N2-5  | trig  |
| A/swine/Nebraska/A01049937/2011/H3N2     | AFU92356 | USA      | 5/4/11   | H3-2     | N2-5  | trig  |
| A/swine/Nebraska/A01240337/2011/H3N2     | AFO83075 | USA      | 11/13/11 | H3-2     | N2-1  | trig  |
| A/swine/Nebraska/A01270646/2012/H1N2     | AGN51290 | USA      | 10/10/12 | H1-6     | N2-5  | trig  |
| A/swine/Nebraska/A01300022/2012/H3N2     | AGJ73231 | USA      | 6/12/12  | H3-2     | N2-1  | trig  |
| A/swine/Niederwinden/IDT14445/2011/H1N2  | AGA19202 | Germany  | 12/20/11 | pdm-H1   | N2-10 | pdm   |
| A/swine/Niigata/729/2004/H1N2            | BAK22652 | Japan    | 2004     | class-H1 | N2-13 | class |
| A/swine/Nordkirchen/IDT1993/2003/H3N2    | ACF94705 | Germany  | 2003/04  | H3-10    | N2-9  | euras |
| A/swine/North Carolina/00839/2005/H1N1   | AEO91789 | USA      | 10/27/05 | H1-7     | N1-7  | trig  |

|                                                        |          |     |          |          |      |      |
|--------------------------------------------------------|----------|-----|----------|----------|------|------|
| A/swine/North Carolina/01052/2006/H3N2                 | AHB22962 | USA | 3/14/06  | H3-2     | N2-5 | trig |
| A/swine/North Carolina/01169/2006/H1N2                 | AHB21086 | USA | 6/22/06  | class-H1 | N2-1 | trig |
| A/swine/North Carolina/01216/2006/H3N2                 | AHB22986 | USA | 8/16/06  | H3-2     | N2-5 | trig |
| A/swine/North Carolina/01312/2006/H3N2                 | AHB21098 | USA | 11/16/06 | H3-2     | N2-5 | trig |
| A/swine/North Carolina/01469/2007/H3N2                 | AHB23010 | USA | 2/21/07  | H3-2     | N2-5 | trig |
| A/swine/North Carolina/01484/2006/H3N2                 | AHB21110 | USA | 11/3/06  | H3-2     | N2-5 | trig |
| A/swine/North Carolina/01506/2006/H3N2                 | AHB22950 | USA | 10/31/06 | H3-2     | N2-5 | trig |
| A/swine/North Carolina/01550/2007/H1N1                 | AHB23046 | USA | 4/4/07   | H1-7     | N1-7 | trig |
| A/swine/North Carolina/01930/2007/H3N2                 | AHB21292 | USA | 7/27/07  | H3-2     | N2-5 | trig |
| A/swine/North Carolina/02249/2008/H1N2                 | AHB21471 | USA | 7/30/08  | H1-7     | N2-1 | trig |
| A/swine/North Carolina/03289/2011/H3N2                 | AHB21912 | USA | 1/7/11   | H3-2     | N2-5 | trig |
| A/swine/North Carolina/2003/H3N2                       | ABQ41895 | USA | 2003     | H3-2     | N2-5 | trig |
| A/swine/North Carolina/A01076199/2010/H3N2             | AFC92990 | USA | 3/14/10  | H3-2     | N2-5 | trig |
| A/swine/North Carolina/A01270393/2011/H1N2             | AGS41684 | USA | 12/8/11  | H1-7     | N2-1 | trig |
| A/swine/North Carolina/R08-001877-D08-013371/2008/H3N2 | ACS92891 | USA | 2008     | H3-2     | N2-5 | trig |
| A/swine/North Carolina/SG1197/2004/H3N2                | AHB20855 | USA | 12/30/04 | H3-2     | N2-5 | trig |
| A/swine/North Carolina/SG1230/2005/H3N2                | AHB20966 | USA | 3/16/05  | H3-2     | N2-5 | trig |
| A/swine/North Carolina/SG1281/2007/H1N1                | AHB22353 | USA | 2/1/07   | H1-7     | N1-7 | trig |
| A/swine/North Carolina/SG1306/2008/H3N2                | AHB21447 | USA | 7/3/08   | H3-2     | N2-5 | trig |
| A/swine/North Carolina/SG1364/2010/H3N2                | AHB24501 | USA | 11/24/10 | H3-2     | N2-5 | trig |
| A/swine/North Carolina/SG1462/2004/H3N2                | AHB22710 | USA | 3/3/04   | H3-2     | N2-1 | trig |
| A/swine/North Carolina/SG1464/2004/H3N2                | AHB22734 | USA | 3/10/04  | H3-2     | N2-5 | trig |
| A/swine/Ohio/09SW1483M/2009/H1N2                       | AGB98545 | USA | 7/5/09   | class-H1 | N2-5 | trig |
| A/swine/Ohio/09SW1484M/2009/H1N2                       | AGB98556 | USA | 7/5/09   | class-H1 | N2-5 | trig |
| A/swine/Ohio/09SW1488E/2009/H1N2                       | AGB98468 | USA | 7/5/09   | class-H1 | N2-5 | trig |
| A/swine/Ohio/09SW1490E/2009/H1N2                       | AGB98490 | USA | 7/5/09   | class-H1 | N2-5 | trig |
| A/swine/Ohio/09SW63/2009/H3N2                          | AGB98677 | USA | 8/8/09   | H3-2     | N2-5 | trig |
| A/swine/Ohio/09SW66/2009/H3N2                          | AGB98710 | USA | 8/8/09   | H3-2     | N2-5 | trig |
| A/swine/Ohio/09SW73M/2009/H3N2                         | AGB98732 | USA | 8/8/09   | H3-2     | N2-5 | trig |
| A/swine/Ohio/09SW82/2009/H3N2                          | AGB98820 | USA | 8/13/09  | H3-2     | N2-5 | trig |
| A/swine/Ohio/09SW87/2009/H3N2                          | AGB98864 | USA | 8/13/09  | H3-2     | N2-5 | trig |
| A/swine/Ohio/09SW92/2009/H3N2                          | AGB98919 | USA | 8/13/09  | H3-2     | N2-5 | trig |
| A/swine/Ohio/10SW122/2010/H3N2                         | AGB99007 | USA | 8/12/10  | H3-2     | N2-5 | trig |
| A/swine/Ohio/10SW125/2010/H3N2                         | AGB99018 | USA | 8/12/10  | H3-2     | N2-5 | trig |
| A/swine/Ohio/10SW126/2010/H3N2                         | AGB99029 | USA | 8/12/10  | H3-2     | N2-5 | trig |
| A/swine/Ohio/10SW132/2010/H3N2                         | AGB99073 | USA | 8/12/10  | H3-2     | N2-5 | trig |
| A/swine/Ohio/10SW213/2010/H3N2                         | AGB99282 | USA | 8/24/10  | H3-2     | N2-5 | trig |
| A/swine/Ohio/10SW214/2010/H3N2                         | AGB99293 | USA | 8/24/10  | H3-2     | N2-5 | trig |
| A/swine/Ohio/10SW219/2010/H3N2                         | AGB99326 | USA | 8/24/10  | H3-2     | N2-5 | trig |
| A/swine/Ohio/11SW103/2011/H3N2                         | AGB99348 | USA | 8/5/11   | H3-2     | N2-5 | trig |
| A/swine/Ohio/11SW344/2011/H3N2                         | AGN69789 | USA | 9/30/11  | H3-2     | N2-5 | trig |

|                                        |          |         |          |          |          |       |
|----------------------------------------|----------|---------|----------|----------|----------|-------|
| A/swine/Ohio/12TOSU370/2012/H3N2       | AGG12626 | USA     | 2012/08  | H3-2     | N2-5     | trig  |
| A/swine/Ohio/12TOSU52/2012/H3N2        | AGK62473 | USA     | 6/22/12  | H3-2     | N2-5     | trig  |
| A/swine/Ohio/A00138552/2012/H3N2       | AFX69009 | USA     | 9/2/12   | H3-2     | N2-5     | trig  |
| A/swine/Ohio/A01203186/2012/H3N2       | AFO83338 | USA     | 1/24/12  | H3-2     | N2-5     | trig  |
| A/swine/Oklahoma/00259/2004/H1N2       | AHB22674 | USA     | 3/3/04   | class-H1 | N2-1     | trig  |
| A/swine/Oklahoma/00518/2005/H3N2       | AHB22305 | USA     | 3/1/05   | H3-2     | N2-5     | trig  |
| A/swine/Oklahoma/00801/2005/H1N1       | AHB22854 | USA     | 10/4/05  | H1-6     | class-N1 | trig  |
| A/swine/Oklahoma/008722/2007/H3N2      | ACV42091 | USA     | 2007     | H3-2     | N2-5     | trig  |
| A/swine/Oklahoma/010226-16/2008/H1N2   | ACV42124 | USA     | 2008     | H1-6     | N2-5     | trig  |
| A/swine/Oklahoma/010226-17/2008/H1N2   | ACV42135 | USA     | 2008     | H1-6     | N2-5     | trig  |
| A/swine/Oklahoma/010710-8/2008/H1N2    | ACV42157 | USA     | 2008     | H1-6     | N2-5     | trig  |
| A/swine/Oklahoma/010710-9/2008/H1N2    | ACV42146 | USA     | 2008     | H1-6     | N2-5     | trig  |
| A/swine/Oklahoma/01117/2006/H1N2       | AHB22317 | USA     | 5/2/06   | H1-6     | N2-5     | trig  |
| A/swine/Oklahoma/011289-10/2008/H1N2   | ACV42179 | USA     | 2008     | H1-6     | N2-5     | trig  |
| A/swine/Oklahoma/011289-8/2008/H1N2    | ACV42190 | USA     | 2008     | H1-6     | N2-5     | trig  |
| A/swine/Oklahoma/011289-9/2008/H1N2    | ACV42168 | USA     | 2008     | H1-6     | N2-5     | trig  |
| A/swine/Oklahoma/01139/2006/H1N1       | AHB22926 | USA     | 5/17/06  | H1-6     | class-N1 | trig  |
| A/swine/Oklahoma/011506/2007/H3N2      | ACV42102 | USA     | 2007     | H3-2     | N2-1     | trig  |
| A/swine/Oklahoma/011521-4/2008/H1N2    | ACV42212 | USA     | 2008     | H1-6     | N2-5     | trig  |
| A/swine/Oklahoma/011521-5/2008/H1N2    | ACV42201 | USA     | 2008     | H1-6     | N2-5     | trig  |
| A/swine/Oklahoma/01382/2006/H1N2       | AHB22938 | USA     | 12/6/06  | class-H1 | N2-1     | trig  |
| A/swine/Oklahoma/016179-8/2008/H1N2    | ACV42223 | USA     | 2008     | H1-6     | N2-5     | trig  |
| A/swine/Oklahoma/016179-9/2008/H1N2    | ACV42234 | USA     | 2008     | H1-6     | N2-5     | trig  |
| A/swine/Oklahoma/01741/2007/H1N2       | AHB21242 | USA     | 8/23/07  | H1-6     | N2-5     | trig  |
| A/swine/Oklahoma/02056/2008/H1N2       | AHB21424 | USA     | 2/29/08  | H1-6     | N2-5     | trig  |
| A/swine/Oklahoma/020734-2/2008/H1N2    | ACV42245 | USA     | 2008     | H1-6     | N2-5     | trig  |
| A/swine/Oklahoma/020734-3/2008/H1N2    | ACV42256 | USA     | 2008     | H1-6     | N2-5     | trig  |
| A/swine/Oklahoma/020736-1/2008/H1N2    | ACV42278 | USA     | 2008     | H1-6     | N2-5     | trig  |
| A/swine/Oklahoma/020736-2/2008/H1N2    | ACV42267 | USA     | 2008     | H1-6     | N2-5     | trig  |
| A/swine/Oklahoma/02107/2008/H1N2       | AHB21412 | USA     | 4/2/08   | H1-6     | N2-5     | trig  |
| A/swine/Oklahoma/042169/2008/H1N2      | ACV42289 | USA     | 2008     | H1-6     | N2-5     | trig  |
| A/swine/Oklahoma/053259/2008/H1N2      | ACV42058 | USA     | 2008     | H1-6     | N2-5     | trig  |
| A/swine/Oklahoma/SG1216/2005/H3N2      | AHB20942 | USA     | 3/3/05   | H3-2     | N2-1     | trig  |
| A/swine/Oklahoma/SG1473/2005/H3N2      | AHB22842 | USA     | 9/23/05  | H3-2     | N2-5     | trig  |
| A/swine/Oklahoma/SG1501/2010/mixed     | AHB23141 | USA     | 11/18/10 | H1-6     | N2-5     | trig  |
| A/swine/Ontario/33853/2005/H3N2        | ABF18006 | Canada  | 2005     | H3-2     | N2-5     | trig  |
| A/swine/Papenburg/IDT12653/2010/H1N2   | AGA19312 | Germany | 11/3/10  | pdm-H1   | N2-10    | pdm   |
| A/swine/Pennsylvania/62170-3/2010/H3N2 | ADU85678 | USA     | 10/25/10 | H3-2     | N2-5     | trig  |
| A/swine/Ploufragan/0214/2006/H1N2      | AFR76763 | France  | 9/2/06   | H1-11    | N2-9     | euras |
| A/swine/QC/1840-2/2009/H3N2            | ADV58922 | Canada  | 5/28/09  | H3-2     | N2-5     | trig  |
| A/swine/QC/2108-2/2009/H3N2            | ADV58923 | Canada  | 4/3/09   | H3-2     | N2-5     | trig  |
| A/swine/QC/382/2009/H3N2               | ADV58918 | Canada  | 5/8/09   | H3-2     | N2-5     | trig  |

|                                          |          |          |          |          |          |       |
|------------------------------------------|----------|----------|----------|----------|----------|-------|
| A/swine/QC/414/2009/H3N2                 | ADV58917 | Canada   | 5/22/09  | H3-2     | N2-5     | trig  |
| A/swine/QC/440-A/2009/H3N2               | ADV58919 | Canada   | 5/29/09  | H3-2     | N2-5     | trig  |
| A/swine/Quebec/01001/2006/H3N2           | AHB22092 | Canada   | 2/23/06  | H3-2     | N2-5     | trig  |
| A/swine/Quebec/01002/2006/H3N2           | AHB24707 | Canada   | 2/23/06  | H3-2     | N2-5     | trig  |
| A/swine/Quebec/4001/2005/H3N2            | ACF04401 | Canada   | 7/12/05  | H3-2     | N2-5     | trig  |
| A/swine/Ratchaburi/NIAH874/2005/H3N2     | BAH02137 | Thailand | 2005     | H3-15    | N2-15    | euras |
| A/swine/Saitama/1/2000/H1N2              | BAK22653 | Japan    | 2000     | class-H1 | N2-13    | class |
| A/swine/Saitama/1996/H1N2                | BAH02177 | Japan    | 1996     | class-H1 | N2-13    | class |
| A/swine/Saitama/21/2004/H1N2             | BAK22654 | Japan    | 2004     | class-H1 | N2-13    | class |
| A/swine/Saraburi/NIAH107725-28/2008/H3N2 | BAL70441 | Thailand | 2008/06  | H3-15    | N2-15    | euras |
| A/swine/Saraburi/NIAH109713-36/2009/H3N2 | BAL70451 | Thailand | 2009/07  | H3-15    | N2-15    | euras |
| A/swine/Saraburi/NIAH13021/2005/H1N2     | BAH02087 | Thailand | 2005     | class-H1 | N2-9     | euras |
| A/swine/Saskatchewan/01114/2006/H3N2     | AHB22104 | Canada   | 5/1/06   | H3-2     | N2-5     | trig  |
| A/swine/Saskatchewan/02903/2009/H3N2     | AHB22224 | Canada   | 9/24/09  | H3-8     | N2-8     | human |
| A/swine/Saskatchewan/SD0001/2011/H3N2    | AHB22543 | Canada   | 12/1/11  | H3-2     | N2-5     | trig  |
| A/swine/Shanghai/1/2007/H1N2             | ACI48761 | China    | 3/24/07  | class-H1 | N2-1     | trig  |
| A/swine/SouthCarolina/01414/2006/H1N1    | AHB22974 | USA      | 12/19/06 | H1-7     | N1-7     | trig  |
| A/swine/SouthDakota/152B/2009/H1N2       | ADU85822 | USA      | 9/4/09   | H1-7     | N2-5     | trig  |
| A/swine/SouthDakota/3/2012/H3N2          | AFS50183 | USA      | 2012/06  | H3-2     | N2-5     | trig  |
| A/swine/SouthDakota/SG1453/2003/H3N2     | AHB22602 | USA      | 4/10/03  | H3-2     | N2-1     | trig  |
| A/swine/Spain/40564/2002/H1N2            | AFR76779 | Spain    | 2002     | H1-11    | N2-9     | euras |
| A/swine/Spain/42386/2002/H3N2            | ABO44045 | Spain    | 2002     | H3-10    | N2-10    | euras |
| A/swine/Spain/80598LP1/2007/H3N2         | CCQ71970 | Spain    | 2007     | H3-10    | N2-10    | euras |
| A/swine/Spain/80598LP4/2007/H1N2         | AFR76790 | Spain    | 2007     | H1-11    | N2-9     | euras |
| A/swine/Spain/82108/2007/H3N2            | CCQ71982 | Spain    | 2007     | H3-10    | N2-10    | euras |
| A/swine/Spain/SF12091/2007/H1N2          | CCG47911 | Spain    | 2007     | H1-11    | N2-9     | euras |
| A/swine/Spain/SF32071/2007/H3N2          | AGC96197 | USA      | 10/25/12 | H3-10    | N2-10    | euras |
| A/swine/Tennessee/A01104055/2012/H3N2    | AHB23193 | USA      | 7/22/04  | H3-2     | N2-5     | trig  |
| A/swine/Texas/00376/2004/H3N2            | AHB22866 | USA      | 10/12/05 | H3-2     | N2-1     | trig  |
| A/swine/Texas/00816/2005/H3N2            | ACV42113 | USA      | 2008     | H3-2     | N2-1     | trig  |
| A/swine/Texas/008648/2008/H1N2           | AHB21050 | USA      | 11/2/06  | H1-6     | N2-1     | trig  |
| A/swine/Texas/01308/2006/H1N2            | AHB21230 | USA      | 3/8/07   | class-H1 | N2-1     | trig  |
| A/swine/Texas/01492/2007/H1N2            | AHB21206 | USA      | 10/25/07 | H1-6     | N2-5     | trig  |
| A/swine/Texas/01822/2007/H3N1            | ACV42047 | USA      | 2008     | H3-2     | class-N1 | trig  |
| A/swine/Texas/050625/2008/H1N2           | AAD51248 | USA      | 1998     | H1-6     | N2-5     | trig  |
| A/swine/Texas/4199-2/1998/H3N2           | AEK70338 | USA      | 1998     | H3-1     | N2-1     | trig  |
| A/swine/Texas/A01049555/2011/H3N2        | AEZ01207 | USA      | 2/14/11  | H3-2     | N2-1     | trig  |
| A/swine/Texas/A01049915/2011/H3N2        | AEZ01211 | USA      | 4/28/11  | H3-2     | N2-1     | trig  |
| A/swine/Texas/SG1186/2004/H3N2           | AHB20833 | USA      | 10/22/04 | H3-2     | N2-1     | trig  |
| A/swine/Texas/SG1250/2006/H1N2           | AHB21062 | USA      | 6/21/06  | H1-6     | N2-5     | trig  |
| A/swine/Texas/SG1270/2007/H3N2           | AHB23744 | USA      | 3/1/07   | H3-2     | N2-5     | trig  |



|                                        |          |          |          |          |            |       |
|----------------------------------------|----------|----------|----------|----------|------------|-------|
| A/swine/Texas/SG1501/2010/H3N2         | AHB23154 | USA      | 4/20/10  | H3-2     | N2-5       | trig  |
| A/swine/Thailand/PB482/2009/H3N2       | AGK24404 | Thailand | 11/17/09 | H3-15    | N2-15      | euras |
| A/swine/Tianjin/1/2007/H1N2            | ADU02114 | China    | 2007/12  | class-H1 | N2-14      | euras |
| A/swine/Tornitz/IDT14598/2012/H1N2     | AGA19192 | Germany  | 1/19/12  | pdm-H1   | N2-10      | pdm   |
| A/swine/UdonThani/NIAH464/2004/H3N2    | BAH02107 | Thailand | 2004     | H3-10    | N2-10      | euras |
| A/swine/Wettringen/IDT13795/2011/H1N2  | AGA19282 | Germany  | 8/3/11   | pdm-H1   | N2-10      | pdm   |
| A/swine/Wisconsin/A00677500/2012/H3N2  | AFV71413 | USA      | 8/19/12  | H3-2     | N2-5       | trig  |
| A/swine/Wisconsin/H02AS8/2002/H3N2     | AFR76801 | USA      | 2002     | H3-2     | N2-1       | trig  |
| A/swine/Wuerusreuth/IDT10990/2009/H3N1 | AGA19322 | Germany  | 11/17/09 | H3-10    | pdm-<br>N1 | pdm   |
| A/swine/Zhejiang/1/2004/H1N2           | AAZ79398 | China    | 2004     | class-H1 | N2-14      | class |

**Table S3. HA data used in HA/NA analysis.** GenBank accession numbers (PB2 segment), and country and date of collection for the 341 H3 sequences from swine influenza viruses that are related to human seasonal viruses used in this study.

| <b>Virus name</b>                     | <b>Accession</b> | <b>Subtype</b> | <b>Country</b> | <b>Date</b> |
|---------------------------------------|------------------|----------------|----------------|-------------|
| A/swine/Alabama/SG1224/2005           | AHB52173         | H3N2           | USA            | 4/26/05     |
| A/swine/Alberta/00805/2005            | AHB22069         | H3N2           | Canada         | 10/10/05    |
| A/swine/Alberta/14722/2005            | ABF17955         | H3N2           | Canada         | 2005        |
| A/swine/Alberta/SG1405/2005           | AHB22057         | H3N2           | Canada         | 10/7/05     |
| A/swine/Argentina/CIP051-A160/2011    | AGK62750         | H3N2           | Argentina      | 2011/04     |
| A/swine/Argentina/CIP051-A2/2008      | AEI60109         | H3N2           | Argentina      | 2008/11     |
| A/swine/Bakum/8602/99                 | ABQ97205         | H3N2           | Germany        | 1999        |
| A/swine/Bakum/909/93                  | CAC81016         | H3             | Germany        | 1993        |
| A/swine/Bakum/IDT1769/2003            | ACR39187         | H3N2           | Germany        | 3/7/03      |
| A/swine/Binh Duong/03-06/2010         | BAK41887         | H3N2           | Viet Nam       | 2010/02     |
| A/swine/Binh Duong/03-08/2010         | BAK41888         | H3N2           | Viet Nam       | 2010/02     |
| A/swine/Binh Duong/03-09/2010         | BAK41889         | H3N2           | Viet Nam       | 2010/02     |
| A/swine/Binh Duong/03-10/2010         | BAK41890         | H3N2           | Viet Nam       | 2010/02     |
| A/swine/Binh Duong/03-13/2010         | BAK41891         | H3N2           | Viet Nam       | 2010/02     |
| A/swine/Binh Duong/03-14/2010         | BAK41892         | H3N2           | Viet Nam       | 2010/02     |
| A/swine/Bissendorf/IDT1864/2003       | ACR39197         | H3N2           | Germany        | 3/19/03     |
| A/swine/Bondelum/IDT5959/2007         | ACR39194         | H3N2           | Germany        | 2/28/07     |
| A/swine/Brabant/1984                  | ADT79182         | H3N2           | Netherlands    | 1984        |
| A/swine/British Columbia/00633/2005   | AHB22045         | H3N2           | Canada         | 5/19/05     |
| A/swine/British Columbia/28103/2005   | ABF17956         | H3N2           | Canada         | 2005        |
| A/swine/Chachoengsao/2002             | BAJ11772         | H3N2           | Thailand       | 2002        |
| A/swine/Chachoengsao/2003             | BAH02100         | H3N2           | Thailand       | 2003        |
| A/swine/Chachoengsao/NIAH-Nongwa/2003 | ABY40411         | H3N2           | Thailand       | 2003        |
| A/swine/Chachoengsao/NIAH586/2005     | ABY40412         | H3N2           | Thailand       | 2005        |
| A/swine/Chonburi/05CB2/2005           | ABY40417         | H3N2           | Thailand       | 2005        |
| A/swine/Chonburi/2002                 | BAJ12103         | H3N2           | Thailand       | 2002        |
| A/swine/Chonburi/NIAH106952-026/2011  | BAM62971         | H3N2           | Thailand       | 2011/02     |
| A/swine/Chonburi/NIAH106952-028/2011  | BAM62981         | H3N2           | Thailand       | 2011/02     |
| A/swine/Colombo/48/2004               | AGA18968         | H3N2           | Sri Lanka      | 3/3/04      |
| A/swine/Colorado/1/1977               | ABD61551         | H3N2           | USA            | 1977        |
| A/swine/Colorado/A01203748/2012       | AFU10042         | H3N2           | USA            | 8/13/12     |
| A/swine/Damme/IDT5673/2006            | ACR39192         | H3N2           | Germany        | 11/16/06    |
| A/swine/Eastern China/S17/2003        | AGF68617         | H3N2           | China          | 4/1/03      |
| A/swine/Ehime/1/2002                  | BAN14744         | H3N2           | Japan          | 2002        |
| A/swine/Ehime/2/2002                  | BAN14745         | H3N2           | Japan          | 2002        |
| A/swine/England/163266/1987           | AFR76027         | H3N2           | United         | 1987        |

|                             |          |      |                |          |
|-----------------------------|----------|------|----------------|----------|
|                             |          |      | Kingdom        |          |
| A/swine/England/203759/1992 | AFR76101 | H3N1 | United Kingdom | 3/12/92  |
| A/swine/England/285393/1993 | AFR76162 | H3N2 | United Kingdom | 4/21/93  |
| A/swine/England/375017/1993 | AFR76216 | H3N2 | United Kingdom | 10/24/93 |
| A/swine/England/425069/1994 | AFR76270 | H3N2 | United Kingdom | 2/7/94   |
| A/swine/England/704563/1995 | AFR76416 | H3N1 | United Kingdom | 8/23/95  |
| A/swine/England/87842/1990  | AFR76460 | H3N2 | United Kingdom | 8/6/90   |
| A/swine/England/90591/1997  | AFR76481 | H3N2 | United Kingdom | 2/10/97  |
| A/swine/Finistere/127/99    | CAC86626 | H3N2 | France         | 1999     |
| A/swine/Gent/96/2007        | AFR76645 | H3N2 | Belgium        | 2007     |
| A/swine/Germany/S043/2002   | CAP49197 | H3N2 | Germany        | 2002     |
| A/swine/Germany/SEC27/97    | CAP49188 | H3N2 | Germany        | 1997     |
| A/swine/Germany/Vi3161/95   | CAP49178 | H3N2 | Germany        | 1995     |
| A/swine/Guangdong/02/2005   | ACH69613 | H3N2 | China          | 2005     |
| A/swine/Guangdong/1/2003    | AAW34374 | H3N2 | China          | 2003     |
| A/swine/Guangdong/3/2003    | AAW34375 | H3N2 | China          | 2003     |
| A/swine/Guangdong/4/2003    | AAW34376 | H3N2 | China          | 2003     |
| A/swine/Guangdong/5/2003    | AAW34377 | H3N2 | China          | 2003     |
| A/swine/Guangdong/6/2004    | AAW34378 | H3N2 | China          | 2004     |
| A/swine/Guangdong/L21/2011  | AFM47165 | H3N2 | China          | 2/27/11  |
| A/swine/Guangdong/Z5/2003   | ACQ77601 | H3N2 | China          | 2003/12  |
| A/swine/Guangxi/1/2004      | ACH69645 | H3N2 | China          | 3/25/04  |
| A/swine/Guangxi/NS2783/2010 | AEX30560 | H3N2 | China          | 11/7/10  |
| A/swine/Henan/S4/2001       | ABP82768 | H3N2 | China          | 2001     |
| A/swine/Hong Kong/1144/02   | AAR12348 | H3N2 | Hong Kong      | 2002     |
| A/swine/Hong Kong/1197/02   | AAR12349 | H3N2 | Hong Kong      | 2002     |
| A/swine/Hong Kong/1212/02   | AAR12340 | H3N2 | Hong Kong      | 2002     |
| A/swine/Hong Kong/126/1982  | AAA43211 | H3N2 | Hong Kong      | 1982     |
| A/swine/Hong Kong/1311/01   | AAR12336 | H3N2 | Hong Kong      | 2001     |
| A/Swine/Hong Kong/2405/98   | AAL30462 | H3N2 | Hong Kong      | 1998     |
| A/Swine/Hong Kong/2422/98   | AAL30463 | H3N2 | Hong Kong      | 1998     |
| A/Swine/Hong Kong/2429/98   | AAL30464 | H3N2 | Hong Kong      | 1998     |
| A/swine/Hong Kong/2503/2011 | AEX30540 | H3N2 | Hong Kong      | 6/16/11  |
| A/swine/Hong Kong/312/00    | AAR12334 | H3N2 | Hong Kong      | 2000     |
| A/swine/Hong Kong/411/02    | AAR12339 | H3N2 | Hong Kong      | 2002     |
| A/swine/Hong Kong/4361/99   | AAR12332 | H3N2 | Hong Kong      | 1999     |
| A/swine/Hong Kong/5190/99   | AAR12342 | H3N2 | Hong Kong      | 1999     |
| A/swine/Hong Kong/5200/99   | AAR12343 | H3N2 | Hong Kong      | 1999     |
| A/swine/Hong Kong/5212/99   | AAR12344 | H3N2 | Hong Kong      | 1999     |

|                                  |          |      |           |          |
|----------------------------------|----------|------|-----------|----------|
| A/swine/Hong Kong/7220/00        | AAR12333 | H3N2 | Hong Kong | 2000     |
| A/swine/Hong Kong/74/02          | AAR12338 | H3N2 | Hong Kong | 2002     |
| A/swine/Hong Kong/7982/00        | AAR12345 | H3N2 | Hong Kong | 2000     |
| A/swine/Hong Kong/81/1978        | AAA43212 | H3N2 | Hong Kong | 1978     |
| A/swine/Hong Kong/9285/01        | AAR12335 | H3N2 | Hong Kong | 2001     |
| A/swine/Hong Kong/9296/01        | AAR12346 | H3N2 | Hong Kong | 2001     |
| A/swine/Hong Kong/9745/01        | AAR12347 | H3N2 | Hong Kong | 2001     |
| A/swine/Hong Kong/NS2439/2011    | AEX30550 | H3N2 | Hong Kong | 6/16/11  |
| A/swine/Hong Kong/q066/99        | AAR12341 | H3N2 | Hong Kong | 1999     |
| A/swine/Hungary/13509/2007       | ACN72632 | H3N2 | Hungary   | 2007/08  |
| A/swine/Illinois/A00857304a/2012 | AFH41260 | H3N2 | USA       | 1/5/12   |
| A/swine/Illinois/A01047183/2010  | AFD32590 | H3N2 | USA       | 11/30/10 |
| A/swine/Illinois/A01047528/2010  | AFD32586 | H3N2 | USA       | 12/2/10  |
| A/swine/Illinois/A01201763/2011  | AFM47137 | H3N2 | USA       | 6/23/11  |
| A/swine/Illinois/A01201770/2011  | AFH53676 | H3N2 | USA       | 6/19/11  |
| A/swine/Illinois/A01241066/2012  | AFU09020 | H3N2 | USA       | 1/16/12  |
| A/swine/Illinois/A01241469/2012  | AFU08940 | H3N2 | USA       | 2/8/12   |
| A/swine/Illinois/A01445725/2013  | AGJ73142 | H3N2 | USA       | 2/20/13  |
| A/swine/Indiana/13TOSU1122/2013  | AGY42412 | H3N2 | USA       | 7/25/13  |
| A/swine/Indiana/A00968308/2012   | AFV31473 | H3N2 | USA       | 8/9/12   |
| A/swine/Indiana/A00968373/2012   | AFR61025 | H3N2 | USA       | 7/13/12  |
| A/swine/Indiana/A01076191/2010   | AEZ02129 | H3N2 | USA       | 2/7/10   |
| A/swine/Indiana/A01203372/2012   | AFM46405 | H3N2 | USA       | 4/3/12   |
| A/swine/Indiana/A01260280/2013   | AGO18233 | H3N2 | USA       | 4/19/13  |
| A/swine/Indonesia/P6-09-04/2004  | ADD21428 | H3N1 | Indonesia | 2004     |
| A/swine/Iowa/00186/2003          | AHB22567 | H3N2 | USA       | 10/2/03  |
| A/Swine/Iowa/533/99              | AAG01767 | H3N2 | USA       | 1999     |
| A/Swine/Iowa/569/99              | AAG01776 | H3N2 | USA       | 1999     |
| A/swine/Iowa/A01047906/2010      | AFH53661 | H3N2 | USA       | 12/7/10  |
| A/swine/Iowa/A01076630/2010      | AFH53666 | H3N2 | USA       | 10/26/10 |
| A/swine/Iowa/A01202088/2011      | AFD32597 | H3N2 | USA       | 6/16/11  |
| A/swine/Iowa/A01202089/2011      | AFM46636 | H3N2 | USA       | 6/16/11  |
| A/swine/Iowa/A01202639/2011      | AFM46680 | H3N2 | USA       | 9/30/11  |
| A/swine/Iowa/A01203992/2012      | AFY08172 | H3N2 | USA       | 2012/10  |
| A/swine/Iowa/A01290302/2013      | AGV74403 | H3N2 | USA       | 2013/08  |
| A/swine/Iowa/A01432072/2012      | AFZ15835 | H3N2 | USA       | 2012/10  |
| A/swine/Iowa/A01432077/2012      | AFZ15823 | H3N2 | USA       | 2012/10  |
| A/swine/Iowa/A01432207/2012      | AGC96349 | H3N2 | USA       | 2012/12  |
| A/swine/Iowa/A01432529/2013      | AGJ73321 | H3N2 | USA       | 2013/03  |
| A/swine/Iowa/H02AS8/2002         | ABZ81074 | H3N2 | USA       | 2002/11  |
| A/swine/Iowa/H03HB4/2003         | ACY67024 | H3N2 | USA       | 2003/02  |
| A/swine/Iowa/H03LDH5/2003        | ACY67022 | H3N2 | USA       | 2003/08  |
| A/swine/Italy/10659-1/2007       | ACG59938 | H3N2 | Italy     | 2007     |

|                               |          |          |             |          |
|-------------------------------|----------|----------|-------------|----------|
| A/swine/Italy/1510/98         | CAC40050 | H3N2     | Italy       | 1998     |
| A/swine/Italy/15360-3/2001    | AFR76678 | H3N2     | Italy       | 2001     |
| A/swine/Italy/1850/1977       | ADT79140 | H3N2     | Italy       | 1977     |
| A/swine/Italy/268086/2003     | ACG59941 | H3N2     | Italy       | 2003     |
| A/swine/Italy/272121-1/2002   | AFR76717 | H3N2     | Italy       | 2002     |
| A/swine/Italy/297576/2004     | ABS50308 | H3N2     | Italy       | 2004     |
| A/swine/Italy/302219-3/2004   | ACG59942 | H3N2     | Italy       | 2004     |
| A/swine/Italy/50127/2007      | ACG59939 | H3N2     | Italy       | 2007     |
| A/swine/Italy/526/1985        | ADT79150 | H3N2     | Italy       | 1985     |
| A/swine/Italy/6/1981          | ADT79161 | H3N2     | Italy       | 1981     |
| A/swine/Italy/600/1999        | ABS50299 | H3N2     | Italy       | 1999     |
| A/swine/Italy/65260-11/2006   | ACG59940 | H3N2     | Italy       | 2006     |
| A/swine/Italy/66945/2006      | ABS30898 | H3N1     | Italy       | 2006     |
| A/swine/Italy/7680/2001       | ABS50302 | H3N2     | Italy       | 2001     |
| A/swine/Jena/5/1996           | ABQ97203 | H3N2     | Germany     | 1996     |
| A/swine/Jilin/19/2007         | ACZ53967 | H3N2     | China       | 11/9/07  |
| A/swine/Jilin/37/2008         | ACZ53978 | H3N2     | China       | 10/30/08 |
| A/swine/Kansas/11-104467/2011 | AEL31713 | H3N2     | USA         | 2/16/11  |
| A/swine/Karrenzien/2/87       | ABQ97201 | H3N2     | Germany     | 1987     |
| A/swine/Kentucky/SG1118/2003  | AEO91595 | mixed,H3 | USA         | 7/22/03  |
| A/swine/Korea/A18/2011        | AFR42701 | H3N2     | South Korea | 2011/09  |
| A/swine/Korea/CAN04/2005      | ACE77939 | H3N2     | South Korea | 2005     |
| A/swine/Korea/CAS05/2004      | ACE77938 | H3N2     | South Korea | 2004     |
| A/swine/Korea/CAS07/2005      | ACE77940 | H3N2     | South Korea | 2005     |
| A/swine/Korea/CAS09/2006      | ACE77941 | H3N2     | South Korea | 2006     |
| A/swine/Korea/CN22/2006       | ABI54389 | H3N1     | South Korea | 2006     |
| A/swine/Korea/CY02-07/2012    | AGE83941 | H3N1     | South Korea | 2/7/12   |
| A/swine/Korea/CY02-08/2012    | AGE83930 | H3N1     | South Korea | 2/7/12   |
| A/swine/Korea/CY02-09/2012    | AGE83919 | H3N2     | South Korea | 2/7/12   |
| A/swine/Korea/CY02-10/2012    | AGE83908 | H3N2     | South Korea | 2/20/12  |
| A/swine/Korea/CY03-12/2012    | AGE83886 | H3N1     | South Korea | 3/6/12   |
| A/swine/Korea/CY03-13/2012    | AGE83876 | H3N1     | South Korea | 3/6/12   |
| A/swine/Korea/CY03-14/2012    | AGE83865 | H3N2     | South Korea | 3/6/12   |
| A/swine/Korea/CY03-15/2012    | AGE83854 | H3N2     | South Korea | 3/6/12   |
| A/swine/Korea/CY03-16/2012    | AGE83843 | H3N2     | South Korea | 3/27/12  |
| A/swine/Korea/CY03-17/2012    | AGE83832 | H3N2     | South Korea | 3/27/12  |
| A/swine/Korea/CY03-18/2012    | AGE83821 | H3N2     | South Korea | 3/27/12  |
| A/swine/Korea/CY03-19/2012    | AGE83810 | H3N2     | South Korea | 3/27/12  |
| A/swine/Korea/CY07/2007       | ACE77944 | H3N2     | South Korea | 2007     |
| A/swine/Korea/CY10/2007       | ACE77946 | H3N2     | South Korea | 2007     |
| A/swine/Korea/D79/2011        | AFR42702 | H3N2     | South Korea | 2011/10  |
| A/swine/Korea/JNS06/2004      | ABY81821 | H3N2     | South Korea | 2004     |
| A/swine/Korea/KSB/2012        | AFR42700 | H3N2     | South Korea | 2012/03  |

|                                  |          |      |             |          |
|----------------------------------|----------|------|-------------|----------|
| A/swine/Korea/PL01/2012          | AGS08997 | H3N2 | South Korea | 4/23/12  |
| A/swine/Korea/PZ72-1/2006        | ABI54388 | H3N1 | South Korea | 2006     |
| A/swine/Leipzig/145/92           | ABQ97202 | H3N2 | Germany     | 1992     |
| A/swine/Lohne/1/97               | ABQ97204 | H3N2 | Germany     | 1997     |
| A/swine/Manitoba/00446/2005      | AHB22484 | H3N2 | Canada      | 1/25/05  |
| A/swine/Manitoba/01179/2006      | AHB22105 | H3N2 | Canada      | 6/29/06  |
| A/swine/Manitoba/01642/2007      | AHB22117 | H3N2 | Canada      | 6/20/07  |
| A/swine/Manitoba/01643/2007      | AHB22129 | H3N2 | Canada      | 6/20/07  |
| A/swine/Manitoba/01782/2007      | AHB22153 | H3N2 | Canada      | 10/3/07  |
| A/swine/Manitoba/01799/2007      | AHB51448 | H3N2 | Canada      | 10/16/07 |
| A/swine/Manitoba/02182/2008      | AHB22165 | H3N2 | Canada      | 5/30/08  |
| A/swine/Manitoba/02862/2009      | AHB22201 | H3N2 | Canada      | 7/1/09   |
| A/swine/Manitoba/02946/2010      | AHB51484 | H3N2 | Canada      | 1/20/10  |
| A/swine/Manitoba/12707/2005      | ABF17957 | H3N2 | Canada      | 2005     |
| A/swine/Manitoba/SG1431/2008     | AHB22177 | H3N2 | Canada      | 6/17/08  |
| A/swine/Manitoba/SG1432/2008     | AHB22189 | H3N2 | Canada      | 6/17/08  |
| A/swine/Manitoba/SG1438/2011     | AHB22225 | H3N2 | Canada      | 11/8/11  |
| A/swine/Melle/IDT5706/2006       | ACR39193 | H3N2 | Germany     | 11/16/06 |
| A/swine/Mexico/SG1442/2010       | AHB22237 | H3N2 | Mexico      | 11/29/10 |
| A/swine/Mexico/SG1444/2011       | AHB22555 | H3N2 | Mexico      | 10/21/11 |
| A/swine/Mexico/SG1447/2011       | AHB24765 | H3N2 | Mexico      | 10/21/11 |
| A/swine/Mexico/SG1448/2011       | AHB24776 | H3N2 | Mexico      | 10/21/11 |
| A/swine/Mexico/SG1449/2011       | AHB22271 | H3N2 | Mexico      | 10/21/11 |
| A/swine/Michigan/A01202655/2011  | AFM46828 | H3N2 | USA         | 10/5/11  |
| A/swine/Michigan/A01259034/2012  | AGJ73211 | H3N2 | USA         | 12/18/12 |
| A/swine/Minnesota/00611/2005     | AEO91768 | H3N2 | USA         | 5/20/05  |
| A/swine/Minnesota/593/99         | AAG01785 | H3N2 | USA         | 1999     |
| A/swine/Minnesota/66853/2006     | ACK43236 | H3N2 | USA         | 12/26/06 |
| A/swine/Minnesota/761/2007       | ACK43239 | H3N2 | USA         | 2007     |
| A/swine/Minnesota/A00907734/2011 | AFH53660 | H3N2 | USA         | 8/4/11   |
| A/swine/Minnesota/A01047396/2011 | AFD32673 | H3N2 | USA         | 1/13/11  |
| A/swine/Minnesota/A01076193/2010 | AFL56791 | H3N2 | USA         | 2/14/10  |
| A/swine/Minnesota/A01076196/2010 | AEZ02140 | H3N2 | USA         | 2/28/10  |
| A/swine/Minnesota/A01076531/2010 | AFL56803 | H3N2 | USA         | 10/7/10  |
| A/swine/Minnesota/A01116200/2011 | AFH53671 | H3N2 | USA         | 8/29/11  |
| A/swine/Minnesota/A01240095/2011 | AFH53640 | H3N2 | USA         | 11/21/11 |
| A/swine/Minnesota/A01240557/2011 | AFI71257 | H3N2 | USA         | 12/13/11 |
| A/swine/Minnesota/A01280543/2013 | AGG12659 | H3N2 | USA         | 1/25/13  |
| A/swine/Minnesota/A01300213/2012 | AFU10029 | H3N2 | USA         | 6/15/12  |
| A/swine/Minnesota/A01301000/2012 | AFU10081 | H3N2 | USA         | 5/3/12   |
| A/swine/Minnesota/A01301617/2012 | AFU92374 | H3N2 | USA         | 9/7/12   |
| A/swine/Minnesota/A01327769/2012 | AFU08944 | H3N2 | USA         | 4/23/12  |
| A/swine/Minnesota/A01397282/2013 | AGS08785 | H3N2 | USA         | 6/24/13  |

|                                       |          |          |             |          |
|---------------------------------------|----------|----------|-------------|----------|
| A/swine/Minnesota/SG1236/2005         | AHB20967 | H3N2     | USA         | 4/22/05  |
| A/swine/Minnesota/SG1238/2005         | AHB20979 | H3N2     | USA         | 6/2/05   |
| A/swine/Minnesota/SG235/2007          | ACI89682 | H3N2     | USA         | 6/11/07  |
| A/swine/Minnesota/SG236/2007          | ACI89685 | H3N2     | USA         | 6/10/07  |
| A/swine/Missouri/00355/2004           | AHB51316 | H3N2     | USA         | 7/30/04  |
| A/swine/Missouri/A01240016/2011       | AFJ19078 | H3N2     | USA         | 11/15/11 |
| A/swine/Nagano/2000                   | BAN14743 | H3N2     | Japan       | 2000     |
| A/swine/Nakhon Pathom/2002            | BAJ14039 | H3N2     | Thailand    | 2002     |
| A/swine/Nakhon pathom/NIAH586-1/2005  | ABY40413 | H3N2     | Thailand    | 2005     |
| A/swine/Nakhon pathom/NIAH586-2/2005  | ABY40414 | H3N2     | Thailand    | 2005     |
| A/swine/Nebraska/00188/2003           | AHB22615 | H3N2     | USA         | 10/3/03  |
| A/Swine/Nebraska/209/98               | AAG01758 | H3N2     | USA         | 1998     |
| A/swine/Nebraska/A01104010/2011       | AFD32608 | H3N2     | USA         | 12/5/11  |
| A/swine/Nebraska/A01241114/2012       | AFU08624 | H3N2     | USA         | 1/10/12  |
| A/swine/Nebraska/A01399268/2013       | AGY14425 | H3N2     | USA         | 8/9/13   |
| A/swine/New Mexico/SG1158/2003        | AHB51112 | H3N2     | USA         | 6/19/03  |
| A/swine/Nordkirchen/IDT1993/2003      | ACF94709 | H3N2     | Germany     | 2003/04  |
| A/swine/North Carolina/00116/2003     | AHB51520 | H3N2     | USA         | 7/2/03   |
| A/swine/North Carolina/00950/2006     | AHB24810 | H3N2     | USA         | 9/27/06  |
| A/swine/North Carolina/01469/2007     | AHB22999 | H3N2     | USA         | 2/21/07  |
| A/swine/North Carolina/A01048779/2011 | AEZ54202 | H3N2     | USA         | 11/15/11 |
| A/swine/North Carolina/A01049436/2011 | AEI87831 | H3N2     | USA         | 1/19/11  |
| A/swine/North Carolina/A01076178/2009 | AEZ02122 | H3N2     | USA         | 12/6/09  |
| A/swine/North Carolina/SG1197/2004    | AHB20844 | H3N2     | USA         | 12/30/04 |
| A/swine/North Carolina/SG1462/2004    | AHB22699 | H3N2     | USA         | 3/3/04   |
| A/swine/Obihiro/10/1985               | BAH98103 | H3N2     | Japan       | 1985     |
| A/swine/Oedenrode/7c/1996             | ADT79171 | H3N2     | Netherlands | 1996     |
| A/swine/Ohio/09SW65/2009              | AGB98689 | H3N2     | USA         | 8/8/09   |
| A/swine/Ohio/09SW74M/2009             | AGB98733 | H3N2     | USA         | 8/8/09   |
| A/swine/Ohio/09SW84/2009              | AGB98832 | H3N2     | USA         | 8/13/09  |
| A/swine/Ohio/09SW88/2009              | AGB98865 | H3N2     | USA         | 8/13/09  |
| A/swine/Ohio/10SW127/2010             | AGB99030 | H3N2     | USA         | 8/12/10  |
| A/swine/Ohio/10SW131/2010             | AGB99052 | H3N2     | USA         | 8/12/10  |
| A/swine/Ohio/10SW207/2010             | AGB99206 | H3N2     | USA         | 8/24/10  |
| A/swine/Ohio/10SW219/2010             | AGB99316 | H3N2     | USA         | 8/24/10  |
| A/swine/Ohio/11SW109/2011             | AGB99360 | H3N2     | USA         | 8/5/11   |
| A/swine/Ohio/11SW119/2011             | AGB99426 | H3N2     | USA         | 8/5/11   |
| A/swine/Ohio/11SW171/2011             | AGB99782 | mixed,H3 | USA         | 8/8/11   |
| A/swine/Ohio/11SW195/2011             | AGB99969 | mixed,H3 | USA         | 8/8/11   |
| A/swine/Ohio/11SW347/2011             | AGC00370 | H3N2     | USA         | 8/19/11  |
| A/swine/Ohio/11SW95/2011              | AGB99470 | H3N2     | USA         | 8/5/11   |
| A/swine/Ohio/12TOSU129/2012           | AGK24520 | H3N2     | USA         | 7/12/12  |
| A/swine/Ohio/12TOSU363/2012           | AGG12620 | H3N2     | USA         | 2012/08  |

|                                     |          |      |          |          |
|-------------------------------------|----------|------|----------|----------|
| A/swine/Ohio/12TOSU420/2012         | AFR78019 | H3N2 | USA      | 8/6/12   |
| A/swine/Ohio/12TOSU439/2012         | AGK62551 | H3N2 | USA      | 8/6/12   |
| A/swine/Ohio/A00152576/2012         | AFV71395 | H3N2 | USA      | 8/15/12  |
| A/swine/Ohio/A01203186/2012         | AFM47014 | H3N2 | USA      | 1/24/12  |
| A/swine/Ohio/A01280883/2013         | AGI02508 | H3N2 | USA      | 2/15/13  |
| A/swine/Ohio/A01349495/2013         | AGJ73406 | H3N2 | USA      | 3/22/13  |
| A/swine/Oklahoma/00141/2003         | AHB51184 | H3N2 | USA      | 8/28/03  |
| A/swine/Oklahoma/00142/2003         | AHB51124 | H3N2 | USA      | 8/28/03  |
| A/swine/Oklahoma/00153/2003         | AHB51148 | H3N2 | USA      | 9/18/03  |
| A/swine/Oklahoma/00518/2005         | AHB22294 | H3N2 | USA      | 3/1/05   |
| A/swine/Oklahoma/SG1216/2005        | AHB20931 | H3N2 | USA      | 3/3/05   |
| A/swine/Ontario/00130/97            | AAG01749 | H3N2 | Canada   | 1997     |
| A/swine/Ontario/33853/2005          | ABF17958 | H3N2 | Canada   | 2005     |
| A/swine/Osaka-C/0805/2007           | BAN14746 | H3N2 | Japan    | 2007     |
| A/swine/Osaka-C/12-20/2008          | BAN14747 | H3N2 | Japan    | 2008     |
| A/swine/Pennsylvania/A01047912/2010 | AFH53662 | H3N2 | USA      | 11/29/10 |
| A/swine/Pennsylvania/A01076777/2010 | AFU10122 | H3N2 | USA      | 11/3/10  |
| A/swine/Pennsylvania/A01076779/2010 | AFU10198 | H3N2 | USA      | 11/3/10  |
| A/swine/Pennsylvania/A01201666/2011 | AFH53675 | H3N2 | USA      | 6/14/11  |
| A/swine/Potsdam/35/82               | CAC81018 | H3N2 | Germany  | 1982     |
| A/swine/QC/1685-1/2009              | ADV58880 | H3N2 | Canada   | 5/15/09  |
| A/swine/QC/1685-5/2009              | ADV58881 | H3N2 | Canada   | 5/15/09  |
| A/swine/QC/1698-1/2009              | ADV58882 | H3N2 | Canada   | 5/15/09  |
| A/swine/QC/1698-2/2009              | ADV58883 | H3N2 | Canada   | 5/15/09  |
| A/swine/QC/1698-4/2009              | ADV58884 | H3N2 | Canada   | 5/15/09  |
| A/swine/QC/1698-5/2009              | ADV58885 | H3N2 | Canada   | 5/15/09  |
| A/swine/QC/1840-2/2009              | ADV58886 | H3N2 | Canada   | 5/28/09  |
| A/swine/QC/2108-2/2009              | ADV58887 | H3N2 | Canada   | 4/3/09   |
| A/swine/QC/382/2009                 | ADV58878 | H3N2 | Canada   | 5/8/09   |
| A/swine/QC/414/2009                 | ADV58877 | H3N2 | Canada   | 5/22/09  |
| A/swine/QC/440-A/2009               | ADV58879 | H3N2 | Canada   | 5/29/09  |
| A/swine/Quebec/01000/2006           | AHB24683 | H3N2 | Canada   | 2/23/06  |
| A/swine/Quebec/01001/2006           | AHB22081 | H3N2 | Canada   | 2/23/06  |
| A/swine/Quebec/01002/2006           | AHB24696 | H3N2 | Canada   | 2/23/06  |
| A/swine/Quebec/01003/2006           | AHB24708 | H3N2 | Canada   | 2/23/06  |
| A/swine/Quebec/1257777/2010         | AEN68524 | H3N2 | Canada   | 11/8/10  |
| A/swine/Quebec/1259260/2010         | ADY16756 | H3N2 | Canada   | 12/20/10 |
| A/swine/Quebec/1262080/2010         | AEN68504 | H3N2 | Canada   | 12/1/10  |
| A/swine/Quebec/1265553/2010         | ADZ96203 | H3N2 | Canada   | 12/22/10 |
| A/swine/Quebec/1267566/2011         | AEN68533 | H3N2 | Canada   | 1/6/11   |
| A/swine/Quebec/1267568/2010         | AEM91952 | H3N2 | Canada   | 12/30/10 |
| A/swine/Quebec/4001/2005            | ACF04392 | H3N2 | Canada   | 7/12/05  |
| A/swine/Ratchaburi/NIAH59/2004      | BAH02130 | H3N2 | Thailand | 2004     |



|                                     |          |      |          |          |
|-------------------------------------|----------|------|----------|----------|
| A/swine/Ratchaburi/NIAH874/2005     | ABY40415 | H3N2 | Thailand | 2005     |
| A/swine/Ratchaburi/NIAH9426/2005    | ABY40416 | H3N2 | Thailand | 2005     |
| A/swine/Saraburi/NIAH107725-28/2008 | BAL70444 | H3N2 | Thailand | 2008/06  |
| A/swine/Saraburi/NIAH109713-36/2009 | BAL70454 | H3N2 | Thailand | 2009/07  |
| A/swine/Saskatchewan/01114/2006     | AHB22093 | H3N2 | Canada   | 5/1/06   |
| A/swine/Saskatchewan/01834/2007     | AHB51460 | H3N2 | Canada   | 10/29/07 |
| A/swine/Saskatchewan/02903/2009     | AHB22213 | H3N2 | Canada   | 9/24/09  |
| A/swine/Saskatchewan/SD0001/2011    | AHB22532 | H3N2 | Canada   | 12/1/11  |
| A/swine/South Dakota/SG1453/2003    | AHB22591 | H3N2 | USA      | 4/10/03  |
| A/swine/Spain/11/2010               | AFV33761 | H3N2 | Spain    | 1/1/10   |
| A/swine/Spain/12/2010               | AFV33783 | H3N2 | Spain    | 3/1/10   |
| A/swine/Spain/13/2010               | AFV33805 | H3N2 | Spain    | 4/1/10   |
| A/swine/Spain/14/2011               | AFV33882 | H3N2 | Spain    | 6/1/11   |
| A/swine/Spain/33601/2001            | ABD62833 | H3N2 | Spain    | 2001     |
| A/swine/Spain/39139/2002            | ABD62794 | H3N2 | Spain    | 2002     |
| A/swine/Spain/42386/2002            | ABO44035 | H3N2 | Spain    | 2002     |
| A/swine/Spain/54008/2004            | ABE27164 | H3N2 | Spain    | 2004     |
| A/Swine/Spain/80598LP1/2007         | CCQ71959 | H3N2 | Spain    | 2007     |
| A/swine/Spain/82108/2007            | AFR76794 | H3N2 | Spain    | 2007     |
| A/swine/Spain/SF32071/2007          | CCG47908 | H3N2 | Spain    | 2007     |
| A/swine/Tainan/103-11/2003          | ACN90987 | H3N1 | Taiwan   | 8/1/03   |
| A/swine/Taiwan/0408/2004            | ABD85122 | H3N1 | Taiwan   | 2004     |
| A/swine/Tennessee/A01104055/2012    | AGC96201 | H3N2 | USA      | 10/25/12 |
| A/swine/Texas/00376/2004            | AHB23182 | H3N2 | USA      | 7/22/04  |
| A/swine/Texas/4199-2/1998           | AEK70342 | H3N2 | USA      | 1998     |
| A/swine/Texas/SG1186/2004           | AHB20822 | H3N2 | USA      | 10/22/04 |
| A/swine/Thailand/CM480/2009         | AGK24397 | H3N2 | Thailand | 11/17/09 |
| A/swine/Thailand/CM481/2009         | AGK24287 | H3N2 | Thailand | 11/17/09 |
| A/swine/Thailand/CU-BN53/2012       | AGG53177 | H3N2 | Thailand | 3/15/12  |
| A/swine/Thailand/CU-BN54/2012       | AGG53168 | H3N2 | Thailand | 3/15/12  |
| A/swine/Thailand/CU-CG43/2011       | AFO82790 | H3N2 | Thailand | 2011/03  |
| A/swine/Thailand/CU-CG45/2011       | AFO82789 | H3N2 | Thailand | 2011/03  |
| A/swine/Thailand/CU-CG48/2011       | AFO82791 | H3N2 | Thailand | 2011/03  |
| A/swine/Thailand/CU-CG55/2011       | AGG53152 | H3N2 | Thailand | 11/14/11 |
| A/swine/Thailand/CU-P43/2012        | AGG53118 | H3N2 | Thailand | 1/9/12   |
| A/swine/Thailand/CU-P53/2012        | AGG53108 | H3N2 | Thailand | 1/9/12   |
| A/swine/Thailand/KU5.1/2004         | ACL11952 | H3N2 | Thailand | 9/19/04  |
| A/swine/Thailand/PB482/2009         | AGK24407 | H3N2 | Thailand | 11/17/09 |
| A/swine/Thailand/PB483/2009         | AGJ73471 | H3N2 | Thailand | 11/17/09 |
| A/swine/Thailand/PB484/2009         | AGK24417 | H3N2 | Thailand | 11/17/09 |
| A/swine/Thailand/PB485/2009         | AGJ73461 | H3N2 | Thailand | 11/17/09 |
| A/swine/Thailand/PB486/2009         | AGK24297 | H3N2 | Thailand | 11/17/09 |
| A/swine/Thailand/S1/2005            | ACM80372 | H3N2 | Thailand | 2005/08  |

|                                 |          |      |          |         |
|---------------------------------|----------|------|----------|---------|
| A/swine/Udon Thani/NIAH464/2004 | BAH02110 | H3N2 | Thailand | 2004    |
| A/swine/Ukkel/1/1984            | ABF60579 | H3N2 | Belgium  | 1984    |
| A/swine/Vladimir/VL/2009        | AFV31487 | H3N2 | Russia   | 8/7/09  |
| A/swine/Wisconsin/194/1980      | ABD61249 | H3N2 | USA      | 1980    |
| A/swine/Wisconsin/H02AS8/2002   | AFR76805 | H3N2 | USA      | 2002    |
| A/swine/Wyoming/A01381213/2013  | AGO51419 | H3N2 | USA      | 5/21/13 |
| A/swine/Wyoming/A01445296/2013  | AGI02422 | H3N2 | USA      | 2/8/13  |
| A/swine/Yokohama/aq114/2011     | BAM78392 | H3N2 | Japan    | 3/8/11  |
| A/swine/Yokohama/aq138/2011     | BAM78400 | H3N2 | Japan    | 3/8/11  |

**Table S4. NA data used in HA/NA analysis.** GenBank accession numbers (PB2 segment), and country and date of collection for the 936 N2 sequences from swine influenza viruses that are related to human seasonal viruses used in this study.

| <b>Virus name</b>                     | <b>Accession</b> | <b>Subtype</b> | <b>Country</b> | <b>Date</b> |
|---------------------------------------|------------------|----------------|----------------|-------------|
| A/sw/Gent/108/01                      | AAT00442         | H1N2           | Belgium        | 2001        |
| A/sw/Gent/24/00                       | AAT00440         | H1N2           | Belgium        | 2000        |
| A/sw/Obihiro/1/1994                   | BAA13092         | H3N2           | Japan          | 1994        |
| A/sw/Shizuoka/110/97                  | AAO15350         | H3N2           | Japan          | 1997        |
| A/sw/Shizuoka/115/97                  | AAO15351         | H3N2           | Japan          | 1997        |
| A/sw/Shizuoka/119/97                  | AAO15352         | H3N2           | Japan          | 1997        |
| A/swine/Alabama/SG1224/2005           | AHB52176         | H3N2           | USA            | 4/26/05     |
| A/swine/Alberta/00805/2005            | AHB22072         | H3N2           | Canada         | 10/10/05    |
| A/swine/Alberta/14722/2005            | ABF17973         | H3N2           | Canada         | 2005        |
| A/swine/Alberta/SG1405/2005           | AHB22060         | H3N2           | Canada         | 10/7/05     |
| A/swine/Aomori/1/2005                 | BAK23288         | H1N2           | Japan          | 2005        |
| A/swine/Argentina/CIP051-A160/2011    | AGK62745         | H3N2           | Argentina      | 2011/04     |
| A/swine/Argentina/CIP051-A2/2008      | AEI60111         | H3N2           | Argentina      | 2008/11     |
| A/swine/Argentina/CIP051-StaFeN2/2010 | ADO65973         | H1N2           | Argentina      | 2010/05     |
| A/swine/Arkansas/02404/2008           | AHB51842         | H1N2           | USA            | 10/10/08    |
| A/swine/Arkansas/02598/2009           | AHB23062         | H3N2           | USA            | 2/12/09     |
| A/swine/Arkansas/02720/2009           | AHB23802         | H1N2           | USA            | 4/6/09      |
| A/swine/Arkansas/02863/2009           | AHB23086         | H3N2           | USA            | 6/26/09     |
| A/swine/Arkansas/02927/2009           | AHB23074         | H1N2           | USA            | 12/2/09     |
| A/swine/Arkansas/SG1295/2008          | AHB21368         | H3N2           | USA            | 5/15/08     |
| A/swine/Arkansas/SG1297/2008          | AHB21380         | H3N2           | USA            | 10/15/08    |
| A/swine/Arkansas/SG1298/2008          | AHB21392         | H3N2           | USA            | 12/30/08    |
| A/swine/Arkansas/SG1319/2009          | AHB23788         | H3N2           | USA            | 1/14/09     |
| A/swine/Arkansas/SG1375/2011          | AHB21832         | H1N2           | USA            | 8/17/11     |
| A/swine/Arkansas/SG1376/2011          | AHB21844         | H1N2           | USA            | 1/26/11     |
| A/swine/Arkansas/SG1377/2011          | AHB21856         | H1N2           | USA            | 4/29/11     |
| A/swine/Bakum/1832/2000               | ABS53374         | H1N2           | Germany        | 2000        |
| A/swine/Bakum/8602/99                 | ABQ97213         | H3N2           | Germany        | 1999        |
| A/swine/Bakum/909/93                  | ABQ97210         | H3N2           | Germany        | 1993        |
| A/swine/Bakum/IDT1769/2003            | ABV60699         | H3N2           | Germany        | 3/7/03      |
| A/swine/Belgium/220/92                | CAC36996         | H3N2           | Belgium        | 1992        |
| A/swine/Binh Doung/02-16/2010         | BAM65748         | H1N2           | Viet Nam       | 2010        |
| A/swine/Binh Duong/03-06/2010         | BAK41899         | H3N2           | Viet Nam       | 2010/02     |
| A/swine/Binh Duong/03-08/2010         | BAK41900         | H3N2           | Viet Nam       | 2010/02     |
| A/swine/Binh Duong/03-09/2010         | BAK41901         | H3N2           | Viet Nam       | 2010/02     |
| A/swine/Binh Duong/03-10/2010         | BAK41902         | H3N2           | Viet Nam       | 2010/02     |

|                                       |          |      |             |          |
|---------------------------------------|----------|------|-------------|----------|
| A/swine/Binh Duong/03-13/2010         | BAK41903 | H3N2 | Viet Nam    | 2010/02  |
| A/swine/Binh Duong/03-14/2010         | BAK41904 | H3N2 | Viet Nam    | 2010/02  |
| A/swine/Bissendorf/IDT1864/2003       | ACR39314 | H3N2 | Germany     | 3/19/03  |
| A/swine/Bondelum/IDT5959/2007         | ACR39311 | H3N2 | Germany     | 2/28/07  |
| A/swine/Brabant/1984                  | ADT79184 | H3N2 | Netherlands | 1984     |
| A/swine/British Columbia/00633/2005   | AHB22048 | H3N2 | Canada      | 5/19/05  |
| A/swine/British Columbia/28103/2005   | ABF17974 | H3N2 | Canada      | 2005     |
| A/swine/Chachoengsao/2003             | BAH02102 | H3N2 | Thailand    | 2003     |
| A/swine/Chachoengsao/NIAH-Nongwa/2003 | ABY40399 | H3N2 | Thailand    | 2003     |
| A/swine/Chachoengsao/NIAH586/2005     | ABY40400 | H3N2 | Thailand    | 2005     |
| A/swine/Chonburi/05CB2/2005           | ABY40405 | H3N2 | Thailand    | 2005     |
| A/swine/Chonburi/NIAH106952-026/2011  | BAM62973 | H3N2 | Thailand    | 2011/02  |
| A/swine/Chonburi/NIAH106952-028/2011  | BAM62983 | H3N2 | Thailand    | 2011/02  |
| A/swine/Cloppenburg/IDT4777/2005      | ABS53365 | H1N2 | Germany     | 12/13/05 |
| A/swine/Colombo/48/2004               | AGA18963 | H3N2 | Sri Lanka   | 3/3/04   |
| A/swine/Colorado/02875/2009           | AHB23098 | H1N2 | USA         | 7/21/09  |
| A/swine/Colorado/1/1977               | ABD61554 | H3N2 | USA         | 1977     |
| A/swine/Colorado/23619/99             | AAG10750 | H3N2 | USA         | 1999     |
| A/swine/Colorado/A01203748/2012       | AFU10044 | H3N2 | USA         | 8/13/12  |
| A/swine/Cotes d'Armor/0040/2007       | CAO82686 | H1N2 | France      | 2007     |
| A/swine/Cotes d'Armor/0041/2007       | CAO82687 | H1N2 | France      | 2007     |
| A/swine/Cotes d'Armor/0102/2008       | CBI83271 | H1N2 | France      | 2008/04  |
| A/swine/Cotes d'Armor/0111/2007       | CAO82688 | H1N2 | France      | 2007     |
| A/swine/Cotes d'Armor/0123/2006       | CAO82689 | H1N2 | France      | 5/12/06  |
| A/swine/Cotes d'Armor/0136-17/2006    | CAO82690 | H1N2 | France      | 5/9/06   |
| A/swine/Cotes d'Armor/0186/2010       | CCC82853 | H1N2 | France      | 2010/09  |
| A/swine/Cotes d'Armor/1174/2009       | AFR76534 | H1N2 | France      | 2009     |
| A/swine/Cotes d'Armor/1190/2002       | AFR76541 | H1N2 | France      | 2002     |
| A/swine/Cotes d'Armor/2433/98         | CAC86329 | H1N2 | France      | 1998     |
| A/swine/Cotes d'Armor/43394/2002      | CAO82691 | H1N2 | France      | 2002     |
| A/swine/Cotes d'Armor/604/99          | CAC86327 | H1N2 | France      | 1999     |
| A/swine/Cotes d'Armor/790/1997        | AFR76592 | H1N2 | France      | 1997     |
| A/swine/Cotes d'Armor/790/1997        | CAC86330 | H1N2 | France      | 1997     |
| A/swine/Cotes d'Armor/799/00          | CAC86319 | H1N2 | France      | 2000     |
| A/swine/Cotes d'Armor/800/00          | CAC86320 | H1N2 | France      | 2000     |
| A/swine/Damme/IDT5673/2006            | ACR39309 | H3N2 | Germany     | 11/16/06 |
| A/swine/Denmark/10044/2004            | AGL04377 | H1N2 | Denmark     | 2004     |
| A/swine/Denmark/10074/2004            | AGL04379 | H1N2 | Denmark     | 2004     |
| A/swine/Denmark/10210/2005            | AGL04372 | H3N2 | Denmark     | 2005     |
| A/swine/Denmark/10302-2/2012          | AGT37104 | H1N2 | Denmark     | 2/21/12  |
| A/swine/Denmark/10501//2004           | AGL04375 | H1N2 | Denmark     | 2004     |
| A/swine/Denmark/12231-1/2005          | AGL04380 | H1N2 | Denmark     | 2005     |

|                                 |          |      |         |          |
|---------------------------------|----------|------|---------|----------|
| A/swine/Denmark/12687/2003      | AGL04339 | H1N2 | Denmark | 2003     |
| A/swine/Denmark/13380/2004      | AGL04357 | H1N2 | Denmark | 2004     |
| A/swine/Denmark/13411/2004      | AGL04359 | H1N2 | Denmark | 2004     |
| A/swine/Denmark/13608/2004      | AGL04351 | H1N2 | Denmark | 2004     |
| A/swine/Denmark/13991/2003      | AGL04373 | H3N2 | Denmark | 2003     |
| A/swine/Denmark/14348-9/2003    | AGL04367 | H3N2 | Denmark | 2003     |
| A/swine/Doetlingen/IDT4735/2005 | ABS53355 | H1N2 | Germany | 12/7/05  |
| A/swine/Ehime/1/1980            | BAA00618 | H1N2 | Japan   | 1980     |
| A/swine/England/00003/2009      | AFR75894 | H1N2 | UK      | 1/12/09  |
| A/swine/England/002295/2002     | AFR75916 | H1N2 | UK      | 12/4/02  |
| A/swine/England/1382/2010       | ADX31847 | H1N2 | UK      | 4/13/10  |
| A/swine/England/1428/2009       | ADX31856 | H1N2 | UK      | 12/8/09  |
| A/swine/England/163266/1987     | AFR76029 | H3N2 | UK      | 1987     |
| A/swine/England/236/2009        | ADX31853 | H1N2 | UK      | 9/28/09  |
| A/swine/England/285393/1993     | AFR76164 | H3N2 | UK      | 4/21/93  |
| A/swine/England/303/2009        | AFR76175 | H1N2 | UK      | 4/9/09   |
| A/swine/England/375017/1993     | AFR76218 | H3N2 | UK      | 10/24/93 |
| A/swine/England/40280/1996      | AFR76251 | H1N2 | UK      | 7/9/96   |
| A/swine/England/425069/1994     | AFR76272 | H3N2 | UK      | 2/7/94   |
| A/swine/England/43142/2001      | AFR76292 | H1N2 | UK      | 12/21/01 |
| A/swine/England/448813/1994     | AFR76303 | H1N2 | UK      | 4/24/94  |
| A/swine/England/483/2006        | AFR76324 | H1N2 | UK      | 5/12/06  |
| A/swine/England/523/2010        | ADX31857 | H1N2 | UK      | 1/4/10   |
| A/swine/England/60797/2000      | AFR76346 | H1N2 | UK      | 12/22/00 |
| A/swine/England/61605/1998      | AFR76365 | H1N2 | UK      | 11/18/98 |
| A/swine/England/645913/1996     | AFR76387 | H1N2 | UK      | 12/20/96 |
| A/swine/England/661263/1997     | AFR76398 | H1N2 | UK      | 2/11/97  |
| A/swine/England/87842/1990      | AFR76462 | H3N2 | UK      | 8/6/90   |
| A/swine/England/88761/1997      | AFR76473 | H1N2 | UK      | 2/3/97   |
| A/swine/England/90591/1997      | AFR76483 | H3N2 | UK      | 2/10/97  |
| A/swine/England/P185/2008       | AFR76500 | H1N2 | UK      | 12/25/08 |
| A/swine/Finistere/0045/2008     | CBI83268 | H1N2 | France  | 2008/02  |
| A/swine/Finistere/0181/2010     | CCD57876 | H1N2 | France  | 2010     |
| A/swine/Finistere/127/99        | CAC86328 | H3N2 | France  | 1999     |
| A/swine/Flanders/1/1998         | AAT00439 | H3N2 | Belgium | 1998     |
| A/swine/Gent/1/84               | AAT00441 | H3N2 | Belgium | 1984     |
| A/swine/Gent/100/2007           | ACN72574 | H1N2 | Belgium | 9/11/07  |
| A/swine/Gent/100/2007           | AFR76603 | H1N2 | Belgium | 2007     |
| A/swine/Gent/102/2007           | ACN72575 | H1N2 | Belgium | 9/14/07  |
| A/swine/Gent/143/2002           | ACN72576 | H1N2 | Belgium | 8/9/02   |
| A/swine/Gent/172/2008           | AFY08273 | H3N2 | Belgium | 9/5/08   |
| A/swine/Gent/177/2002           | ACN72573 | H1N2 | Belgium | 10/9/02  |
| A/swine/Gent/70/84              | CAC40052 | H3N2 | Belgium | 1984     |

|                                  |          |      |           |         |
|----------------------------------|----------|------|-----------|---------|
| A/swine/Gent/7625/1999           | AAT00443 | H1N2 | Belgium   | 1999    |
| A/swine/Gent/96/2007             | AFR76647 | H3N2 | Belgium   | 2007    |
| A/swine/Georgia/02604/2009       | AHB21595 | H3N2 | USA       | 2/20/09 |
| A/swine/Germany/S043/2002        | CAP49198 | H3N2 | Germany   | 2002    |
| A/swine/Germany/SEK1178/2000     | CAP49193 | H1N2 | Germany   | 2000    |
| A/swine/Germany/Vi3161/95        | CAP49179 | H3N2 | Germany   | 1995    |
| A/swine/Granstedt/IDT3475/2004   | ACR39313 | H1N2 | Germany   | 8/26/04 |
| A/swine/Groitzsch/IDT6016-1/2007 | ACR39306 | H1N2 | Germany   | 3/22/07 |
| A/swine/Groitzsch/IDT6016-2/2007 | ACR39307 | H1N2 | Germany   | 3/22/07 |
| A/swine/Guangdong/01/2005        | ABR22243 | H3N2 | China     | 2005    |
| A/swine/Guangdong/02/2005        | ACH69614 | H3N2 | China     | 2005    |
| A/swine/Guangdong/03/2005        | ACH69603 | H3N2 | China     | 2005    |
| A/swine/Guangdong/04/2005        | ACH69592 | H3N2 | China     | 2005    |
| A/swine/Guangdong/1/2010         | ADV19287 | H1N2 | China     | 1/30/10 |
| A/swine/Guangdong/1222/2006      | ACY06416 | H1N2 | China     | 2006    |
| A/swine/Guangdong/164/06         | ABY16762 | H3N2 | China     | 2006    |
| A/swine/Guangdong/165/06         | ABY16763 | H3N2 | China     | 2006    |
| A/swine/Guangdong/166/06         | ABY16764 | H3N2 | China     | 2006    |
| A/swine/Guangdong/2670/2010      | AEK85975 | H1N2 | China     | 8/26/10 |
| A/swine/Guangdong/2676/2010      | AEK85976 | H1N2 | China     | 8/26/10 |
| A/swine/Guangdong/2693/2010      | AEK85977 | H1N2 | China     | 8/26/10 |
| A/swine/Guangdong/2712/2010      | AEK85978 | H1N2 | China     | 8/26/10 |
| A/swine/Guangdong/553/2010       | AEK85969 | H1N2 | China     | 2/27/10 |
| A/swine/Guangdong/603/2010       | AEK85970 | H1N2 | China     | 2/27/10 |
| A/swine/Guangdong/606/2010       | AEK85971 | H1N2 | China     | 2/27/10 |
| A/swine/Guangdong/617/2010       | AEK85972 | H1N2 | China     | 2/27/10 |
| A/swine/Guangdong/628/2010       | AEK85973 | H1N2 | China     | 2/27/10 |
| A/swine/Guangdong/7/2006         | ACY06417 | H3N2 | China     | 2006    |
| A/swine/Guangdong/L21/2011       | AFM47167 | H3N2 | China     | 2/27/11 |
| A/swine/Guangdong/Z5/2003        | ACQ77603 | H3N2 | China     | 2003/12 |
| A/swine/Guangxi/1/2004           | ACH69646 | H3N2 | China     | 3/25/04 |
| A/swine/Guangxi/13/2006          | ABQ42445 | H1N2 | China     | 2006    |
| A/swine/Guangxi/17/2005          | ABQ42447 | H1N2 | China     | 2005    |
| A/swine/Guangxi/NS2783/2010      | AEX30562 | H3N2 | China     | 11/7/10 |
| A/swine/Gunma/1/2012             | BAN37214 | H1N2 | Japan     | 1/13/12 |
| A/swine/Hainan/1/2005            | ABQ42449 | H1N2 | China     | 2005    |
| A/swine/Hebei/10/2006            | ADU02118 | H1N2 | China     | 2006/10 |
| A/swine/Heilongjiang/10/2007     | ADK89129 | H3N2 | China     | 2007/08 |
| A/swine/Henan/4/2010             | AEX30522 | H1N2 | China     | 2010/12 |
| A/swine/Henan/S4/2001            | ABP82769 | H3N2 | China     | 2001    |
| A/swine/Henan/YIL/2010           | AFH77155 | H1N2 | China     | 2010/12 |
| A/swine/Hong Kong/1102/2003      | ADY71214 | H1N2 | Hong Kong | 8/14/03 |
| A/swine/Hong Kong/1110/2006      | ACR83977 | H1N2 | Hong Kong | 8/1/06  |

|                               |          |      |           |          |
|-------------------------------|----------|------|-----------|----------|
| A/swine/Hong Kong/1111/2004   | ADY71320 | H1N2 | Hong Kong | 8/12/04  |
| A/swine/Hong Kong/1112/2007   | ADY72635 | H1N2 | Hong Kong | 8/13/07  |
| A/swine/Hong Kong/1197/02     | AAR12385 | H3N2 | Hong Kong | 2002     |
| A/swine/Hong Kong/1248/2002   | ADY71138 | H1N2 | Hong Kong | 9/9/02   |
| A/swine/Hong Kong/1304/2003   | ADY71225 | H1N2 | Hong Kong | 9/28/03  |
| A/swine/Hong Kong/1311/01     | AAR12372 | H3N2 | Hong Kong | 2001     |
| A/swine/Hong Kong/1382/2003   | ADY71235 | H1N2 | Hong Kong | 10/16/03 |
| A/swine/Hong Kong/1435/2009   | ADG08233 | H1N2 | Hong Kong | 7/23/09  |
| A/swine/Hong Kong/1462/2005   | ADY72577 | H1N2 | Hong Kong | 10/27/05 |
| A/swine/Hong Kong/1479/2009   | ADG08244 | H1N2 | Hong Kong | 7/23/09  |
| A/swine/Hong Kong/1562/2005   | ACR83972 | H1N2 | Hong Kong | 11/11/05 |
| A/swine/Hong Kong/1578/2003   | ADY71246 | H1N2 | Hong Kong | 11/10/03 |
| A/swine/Hong Kong/1763/2003   | ADY71256 | H1N2 | Hong Kong | 12/15/03 |
| A/swine/Hong Kong/2237/2010   | AEK85974 | H1N2 | Hong Kong | 8/2/10   |
| A/swine/Hong Kong/2314/2009   | ADG08352 | H1N2 | Hong Kong | 10/22/09 |
| A/swine/Hong Kong/2503/2011   | AEX30542 | H3N2 | Hong Kong | 6/16/11  |
| A/swine/Hong Kong/294/2009    | ACR83973 | H1N2 | Hong Kong | 2/23/09  |
| A/swine/Hong Kong/3/1976      | BAA00620 | H3N2 | Hong Kong | 1976     |
| A/swine/Hong Kong/4/1976      | BAA00621 | H3N2 | Hong Kong | 1976     |
| A/swine/Hong Kong/411/02      | AAR12375 | H3N2 | Hong Kong | 2002     |
| A/swine/Hong Kong/4361/99     | AAR12368 | H3N2 | Hong Kong | 1999     |
| A/swine/Hong Kong/5190/99     | AAR12378 | H3N2 | Hong Kong | 1999     |
| A/swine/Hong Kong/5212/99     | AAR12380 | H3N2 | Hong Kong | 1999     |
| A/swine/Hong Kong/554/2003    | ACR83970 | H1N2 | Hong Kong | 4/24/03  |
| A/swine/Hong Kong/5609/1999   | ADZ04829 | H1N2 | Hong Kong | 12/21/99 |
| A/swine/Hong Kong/562/2005    | ADY72565 | H1N2 | Hong Kong | 4/15/05  |
| A/swine/Hong Kong/69/2006     | ADY71440 | H1N2 | Hong Kong | 1/10/06  |
| A/swine/Hong Kong/713/2007    | ADY72631 | H1N2 | Hong Kong | 5/22/07  |
| A/swine/Hong Kong/715/2008    | ADY71592 | H1N2 | Hong Kong | 5/29/08  |
| A/swine/Hong Kong/7220/00     | AAR12369 | H3N2 | Hong Kong | 2000     |
| A/swine/Hong Kong/729/2005    | ADY71418 | H1N2 | Hong Kong | 5/26/05  |
| A/swine/Hong Kong/78/2003     | ACR83969 | H1N2 | Hong Kong | 1/23/03  |
| A/swine/Hong Kong/7982/00     | AAR12381 | H3N2 | Hong Kong | 2000     |
| A/swine/Hong Kong/823/2006    | ADY72597 | H1N2 | Hong Kong | 6/6/06   |
| A/swine/Hong Kong/8944/2001   | ADY71008 | H1N2 | Hong Kong | 5/23/01  |
| A/swine/Hong Kong/915/2004    | ACR83964 | H1N2 | Hong Kong | 10/14/04 |
| A/swine/Hong Kong/9296/01     | AAR12382 | H3N2 | Hong Kong | 2001     |
| A/swine/Hong Kong/9745/01     | AAR12383 | H3N2 | Hong Kong | 2001     |
| A/swine/Hong Kong/NS13/2002   | ADY71088 | H1N2 | Hong Kong | 1/21/02  |
| A/swine/Hong Kong/NS157/2004  | ADY71277 | H1N2 | Hong Kong | 2/23/04  |
| A/swine/Hong Kong/NS1889/2009 | ADG08475 | H1N2 | Hong Kong | 12/3/09  |
| A/swine/Hong Kong/NS1890/2009 | ADG08486 | H1N2 | Hong Kong | 12/3/09  |
| A/swine/Hong Kong/NS1892/2009 | ADG08497 | H1N2 | Hong Kong | 12/3/09  |

|                                 |          |      |           |          |
|---------------------------------|----------|------|-----------|----------|
| A/swine/Hong Kong/NS2439/2011   | AEX30552 | H3N2 | Hong Kong | 6/16/11  |
| A/swine/Hong Kong/NS246/2004    | ADY71287 | H1N2 | Hong Kong | 3/18/04  |
| A/swine/Hong Kong/NS252/2009    | ADY71778 | H1N2 | Hong Kong | 3/19/09  |
| A/swine/Hong Kong/NS30/2004     | ADY71267 | H1N2 | Hong Kong | 1/6/04   |
| A/swine/Hong Kong/NS605/2003    | ADY71203 | H1N2 | Hong Kong | 7/10/03  |
| A/swine/Hong Kong/NS623/2002    | ACR83976 | H1N2 | Hong Kong | 7/9/02   |
| A/swine/Hong Kong/NS728/2002    | ADY71128 | H1N2 | Hong Kong | 8/13/02  |
| A/swine/Hong Kong/NS856/2005    | ADY72569 | H1N2 | Hong Kong | 9/27/05  |
| A/swine/Hong Kong/NS856/2007    | ADY72637 | H1N2 | Hong Kong | 9/20/07  |
| A/swine/Hong Kong/NS857/2001    | ACR83974 | H1N2 | Hong Kong | 4/9/01   |
| A/swine/Hong Kong/NS915/2004    | ADY71341 | H1N2 | Hong Kong | 10/14/04 |
| A/swine/Hong Kong/q066/99       | AAR12377 | H3N2 | Hong Kong | 1999     |
| A/swine/Hubei/04/2009           | AEH42776 | H1N2 | China     | 3/10/09  |
| A/swine/Hubei/05/2009           | AEH42787 | H1N2 | China     | 3/10/09  |
| A/swine/Hungary/13509/2007      | ACN72633 | H3N2 | Hungary   | 2007/08  |
| A/swine/IL/07003243/2007        | ACM17256 | H1N2 | USA       | 2007     |
| A/swine/Illinois/00303/2004     | AHB20883 | H3N2 | USA       | 5/18/04  |
| A/swine/Illinois/01131/2006     | AHB21150 | H3N2 | USA       | 5/5/06   |
| A/swine/Illinois/02907/2009     | AHA11539 | H3N2 | USA       | 10/21/09 |
| A/Swine/Illinois/100084/01      | AAL87888 | H1N2 | USA       | 2001     |
| A/Swine/Illinois/100085A/01     | AAL87887 | H1N2 | USA       | 2001     |
| A/Swine/Illinois/21587/99       | AAG10747 | H3N2 | USA       | 1999     |
| A/swine/Illinois/53612-1/2009   | ADU85702 | H3N2 | USA       | 8/20/09  |
| A/swine/Illinois/53612-2/2009   | ADU85703 | H3N2 | USA       | 8/20/09  |
| A/swine/Illinois/53612-3/2009   | ADU85704 | H3N2 | USA       | 9/21/09  |
| A/swine/Illinois/53612-4/2009   | ADU85705 | H3N2 | USA       | 11/5/09  |
| A/swine/Illinois/53612-5/2009   | ADU85706 | H3N2 | USA       | 11/5/09  |
| A/swine/Illinois/53612-7/2010   | ADU85708 | H3N2 | USA       | 6/11/10  |
| A/swine/Illinois/A01047042/2010 | AFH53613 | H1N2 | USA       | 11/29/10 |
| A/swine/Illinois/A01047048/2010 | AFN07827 | H1N2 | USA       | 11/29/10 |
| A/swine/Illinois/A01047089/2010 | AFH53617 | H1N2 | USA       | 11/29/10 |
| A/swine/Illinois/A01047108/2010 | AFH53620 | H1N2 | USA       | 11/29/10 |
| A/swine/Illinois/A01047112/2010 | AFH53621 | H1N2 | USA       | 11/29/10 |
| A/swine/Illinois/A01047162/2010 | AFH53626 | H1N2 | USA       | 11/30/10 |
| A/swine/Illinois/A01047350/2011 | AFN08241 | H1N2 | USA       | 1/18/11  |
| A/swine/Illinois/A01047353/2011 | AFH53631 | H1N2 | USA       | 1/18/11  |
| A/swine/Illinois/A01047397/2011 | AFN08213 | H1N2 | USA       | 1/19/11  |
| A/swine/Illinois/A01047518/2010 | AFH53634 | H1N2 | USA       | 12/7/10  |
| A/swine/Illinois/A01047996/2011 | AFN08163 | H1N2 | USA       | 1/18/11  |
| A/swine/Illinois/A01057087/2010 | ADX60690 | H3N2 | USA       | 4/28/10  |
| A/swine/Illinois/A01057088/2010 | ADX60691 | H3N2 | USA       | 4/28/10  |
| A/swine/Illinois/A01076221/2010 | AFI44394 | H1N2 | USA       | 9/2/10   |
| A/swine/Illinois/A01076361/2010 | AFL56833 | H1N2 | USA       | 9/27/10  |



|                                 |          |      |     |          |
|---------------------------------|----------|------|-----|----------|
| A/swine/Illinois/A01076730/2010 | AFL56839 | H3N2 | USA | 11/1/10  |
| A/swine/Illinois/A01076735/2010 | AFL56840 | H3N2 | USA | 11/1/10  |
| A/swine/Illinois/A01076859/2010 | AFH53694 | H3N2 | USA | 11/11/10 |
| A/swine/Illinois/A01076955/2010 | AFI44398 | H1N2 | USA | 11/14/10 |
| A/swine/Illinois/A01116186/2011 | AFN08125 | H1N2 | USA | 3/28/11  |
| A/swine/Illinois/A01116190/2011 | AFN08277 | H3N2 | USA | 8/25/11  |
| A/swine/Illinois/A01134269/2011 | AFI44404 | H1N2 | USA | 1/31/11  |
| A/swine/Illinois/A01134654/2011 | AFI44410 | H1N2 | USA | 3/3/11   |
| A/swine/Illinois/A01134721/2011 | AFI44414 | H1N2 | USA | 3/10/11  |
| A/swine/Illinois/A01134729/2011 | AFI44415 | H1N2 | USA | 3/10/11  |
| A/swine/Illinois/A01134736/2011 | AFI44416 | H1N2 | USA | 3/10/11  |
| A/swine/Illinois/A01201076/2011 | AFH53698 | H3N2 | USA | 4/7/11   |
| A/swine/Illinois/A01201077/2011 | AFN08141 | H3N2 | USA | 4/7/11   |
| A/swine/Illinois/A01201487/2011 | AFI44427 | H1N2 | USA | 5/23/11  |
| A/swine/Illinois/A01201512/2011 | AFI44428 | H1N2 | USA | 5/25/11  |
| A/swine/Illinois/A01202978/2011 | AFM47039 | H3N2 | USA | 12/16/11 |
| A/swine/Illinois/A01203220/2012 | AFM47058 | H1N2 | USA | 2/6/12   |
| A/swine/Illinois/A01240547/2011 | AFU10092 | H1N2 | USA | 12/23/11 |
| A/swine/Illinois/A01240743/2012 | AFU10084 | H1N2 | USA | 1/9/12   |
| A/swine/Illinois/A01240774/2012 | AFU10209 | H3N2 | USA | 1/9/12   |
| A/swine/Illinois/A01240819/2011 | AFU08895 | H1N2 | USA | 12/30/11 |
| A/swine/Illinois/A01240824/2011 | AFU08679 | H1N2 | USA | 12/30/11 |
| A/swine/Illinois/A01240835/2012 | AFU08755 | H3N2 | USA | 1/3/12   |
| A/swine/Illinois/A01240877/2012 | AFU08927 | H1N2 | USA | 1/4/12   |
| A/swine/Illinois/A01240908/2012 | AFU10225 | H3N2 | USA | 1/3/12   |
| A/swine/Illinois/A01241173/2012 | AFU08579 | H1N2 | USA | 1/10/12  |
| A/swine/Illinois/A01241627/2012 | AFU08583 | H1N2 | USA | 2/15/12  |
| A/swine/Illinois/A01241765/2012 | AFU08663 | H1N2 | USA | 2/23/12  |
| A/swine/Illinois/A01241774/2012 | AFU08819 | H1N2 | USA | 2/23/12  |
| A/swine/Illinois/A01241779/2012 | AFU08711 | H1N2 | USA | 1/31/12  |
| A/swine/Illinois/A01244830/2013 | AGT41812 | H1N2 | USA | 2013/07  |
| A/swine/Illinois/A01270461/2012 | AFX65286 | H1N2 | USA | 10/3/12  |
| A/swine/Illinois/A01270490/2012 | AFY08111 | H1N2 | USA | 9/28/12  |
| A/swine/Illinois/A01271599/2012 | AGB08460 | H1N2 | USA | 10/30/12 |
| A/swine/Illinois/A01277712/2012 | AGB08476 | H1N2 | USA | 11/20/12 |
| A/swine/Illinois/A01291342/2013 | AGX00891 | H1N2 | USA | 2013/08  |
| A/swine/Illinois/A01291426/2013 | AGY14394 | H1N2 | USA | 2013/09  |
| A/swine/Illinois/A01291476/2013 | AGZ62364 | H1N2 | USA | 2013/09  |
| A/swine/Illinois/A01300356/2012 | AFU10024 | H1N2 | USA | 7/5/12   |
| A/swine/Illinois/A01300597/2012 | AFU09928 | H1N2 | USA | 7/13/12  |
| A/swine/Illinois/A01301474/2012 | AFU83153 | H1N2 | USA | 8/24/12  |
| A/swine/Illinois/A01301847/2012 | AFU92385 | H1N2 | USA | 9/10/12  |
| A/swine/Illinois/A01327344/2012 | AFU08811 | H1N2 | USA | 4/2/12   |

|                                 |          |      |     |          |
|---------------------------------|----------|------|-----|----------|
| A/swine/Illinois/A01327554/2012 | AFU08863 | H1N2 | USA | 4/16/12  |
| A/swine/Illinois/A01327563/2012 | AFU08631 | H1N2 | USA | 4/16/12  |
| A/swine/Illinois/A01327905/2012 | AFU08847 | H3N2 | USA | 5/8/12   |
| A/swine/Illinois/A01328594/2012 | AFU08891 | H1N2 | USA | 5/22/12  |
| A/swine/Illinois/A01328924/2012 | AFU10115 | H1N2 | USA | 6/11/12  |
| A/swine/Illinois/A01379300/2013 | AGL07611 | H1N2 | USA | 3/29/13  |
| A/swine/Illinois/A01397556/2013 | AGS41693 | H1N2 | USA | 6/28/13  |
| A/swine/Illinois/A01432945/2013 | AGU69970 | H1N2 | USA | 2013/08  |
| A/swine/Illinois/A01442470/2012 | AGC96384 | H1N2 | USA | 12/7/12  |
| A/swine/Illinois/A01445049/2013 | AGG53749 | H1N2 | USA | 1/29/13  |
| A/swine/Illinois/A01445274/2013 | AGI02397 | H1N2 | USA | 2/7/13   |
| A/swine/Indiana/00427/2004      | AEO91749 | H1N2 | USA | 11/2/04  |
| A/swine/Indiana/13TOSU1128/2013 | AGY42402 | H3N2 | USA | 7/25/13  |
| A/Swine/Indiana/9K035/99        | AAF75996 | H1N2 | USA | 1999     |
| A/swine/Indiana/A00968394/2012  | AGB84907 | H3N2 | USA | 8/6/12   |
| A/swine/Indiana/A01049124/2010  | AEF33048 | H3N2 | USA | 11/19/10 |
| A/swine/Indiana/A01049653/2011  | AEP17250 | H3N2 | USA | 3/8/11   |
| A/swine/Indiana/A01049964/2011  | AEP17063 | H1N2 | USA | 5/11/11  |
| A/swine/Indiana/A01076177/2009  | AFI62162 | H1N2 | USA | 12/6/09  |
| A/swine/Indiana/A01076191/2010  | AEZ02131 | H3N2 | USA | 2/7/10   |
| A/swine/Indiana/A01202298/2011  | AFM46690 | H1N2 | USA | 6/28/11  |
| A/swine/Indiana/A01202621/2011  | AFM46724 | H3N2 | USA | 9/28/11  |
| A/swine/Indiana/A01203521/2012  | AFN66870 | H3N2 | USA | 5/15/12  |
| A/swine/Indiana/A01260093/2012  | AGB08389 | H3N2 | USA | 10/30/12 |
| A/swine/Indiana/A01260155/2012  | AGE83803 | H3N2 | USA | 11/29/12 |
| A/swine/Indiana/A01260230/2013  | AGL96930 | H3N2 | USA | 2/5/13   |
| A/swine/Indiana/A01260252/2013  | AGO18214 | H3N2 | USA | 3/19/13  |
| A/swine/Indiana/A01260254/2013  | AGO18218 | H3N2 | USA | 3/20/13  |
| A/swine/Indiana/A01260283/2013  | AGO18238 | H1N2 | USA | 4/23/13  |
| A/swine/Indiana/A01260313/2013  | AGS09011 | H3N2 | USA | 6/21/13  |
| A/swine/Indiana/A01260361/2013  | AGY14511 | H3N2 | USA | 8/8/13   |
| A/swine/Indiana/A01260371/2013  | AGZ62237 | H3N2 | USA | 8/19/13  |
| A/swine/Indiana/A01327235/2010  | AFQ60248 | H3N2 | USA | 10/27/10 |
| A/swine/Indiana/A01327236/2010  | AFQ60240 | H3N2 | USA | 11/23/10 |
| A/Swine/Indiana/P12439/00       | AAL87886 | H1N2 | USA | 2000     |
| A/swine/Iowa/00186/2003         | AHB22570 | H3N2 | USA | 10/2/03  |
| A/swine/Iowa/01700/2007         | AEO91613 | H3N2 | USA | 7/31/07  |
| A/swine/Iowa/02039/2008         | ADM18074 | H1N2 | USA | 2008     |
| A/swine/Iowa/02204/2008         | AHB23776 | H3N2 | USA | 6/11/08  |
| A/Swine/Iowa/533/99             | AAG01768 | H3N2 | USA | 1999     |
| A/Swine/Iowa/569/99             | AAG01777 | H3N2 | USA | 1999     |
| A/Swine/Iowa/8548-1/98          | AAD51246 | H3N2 | USA | 1998     |
| A/Swine/Iowa/930/01             | AAL87885 | H1N2 | USA | 2001     |

|                             |          |      |     |          |
|-----------------------------|----------|------|-----|----------|
| A/swine/lowa/A01047906/2010 | AFH53686 | H3N2 | USA | 12/7/10  |
| A/swine/lowa/A01049031/2010 | AEC23302 | H3N2 | USA | 11/16/10 |
| A/swine/lowa/A01049112/2010 | AEC23321 | H3N2 | USA | 11/22/10 |
| A/swine/lowa/A01049119/2010 | AFM46542 | H3N2 | USA | 11/19/10 |
| A/swine/lowa/A01049227/2010 | AFM46545 | H1N2 | USA | 12/6/10  |
| A/swine/lowa/A01049450/2011 | AEI87775 | H1N2 | USA | 1/19/11  |
| A/swine/lowa/A01049646/2011 | AEP17248 | H1N2 | USA | 3/7/11   |
| A/swine/lowa/A01049661/2011 | AFM46552 | H1N2 | USA | 3/8/11   |
| A/swine/lowa/A01049755/2011 | AEP17036 | H1N2 | USA | 3/28/11  |
| A/swine/lowa/A01049765/2011 | AEP17038 | H1N2 | USA | 3/29/11  |
| A/swine/lowa/A01049970/2011 | AET09985 | H1N2 | USA | 5/16/11  |
| A/swine/lowa/A01202086/2011 | AFM46683 | H1N2 | USA | 6/16/11  |
| A/swine/lowa/A01202087/2011 | AFM46684 | H1N2 | USA | 6/16/11  |
| A/swine/lowa/A01202088/2011 | AFD32595 | H3N2 | USA | 6/16/11  |
| A/swine/lowa/A01202438/2011 | AFM46695 | H1N2 | USA | 7/12/11  |
| A/swine/lowa/A01202439/2011 | AFM46696 | H1N2 | USA | 7/12/11  |
| A/swine/lowa/A01202442/2011 | AFM46697 | H1N2 | USA | 7/13/11  |
| A/swine/lowa/A01202455/2011 | AFM46703 | H1N2 | USA | 7/18/11  |
| A/swine/lowa/A01202613/2011 | AFM46720 | H3N2 | USA | 9/27/11  |
| A/swine/lowa/A01202693/2011 | AEZ54180 | H1N2 | USA | 10/10/11 |
| A/swine/lowa/A01202743/2011 | AFM46880 | H1N2 | USA | 10/20/11 |
| A/swine/lowa/A01202747/2011 | AFM46882 | H1N2 | USA | 10/18/11 |
| A/swine/lowa/A01202774/2011 | AFM46885 | H1N2 | USA | 10/28/11 |
| A/swine/lowa/A01202878/2011 | AFM47027 | H3N2 | USA | 11/17/11 |
| A/swine/lowa/A01202879/2011 | AFM47028 | H3N2 | USA | 11/17/11 |
| A/swine/lowa/A01202889/2011 | AFM47032 | H3N2 | USA | 11/18/11 |
| A/swine/lowa/A01203001/2011 | AFC95842 | H1N2 | USA | 12/22/11 |
| A/swine/lowa/A01203153/2012 | AFM47049 | H1N2 | USA | 1/17/12  |
| A/swine/lowa/A01203195/2012 | AFM47053 | H1N2 | USA | 1/28/12  |
| A/swine/lowa/A01203439/2012 | AFM46447 | H1N2 | USA | 4/17/12  |
| A/swine/lowa/A01203459/2012 | AFM46450 | H3N2 | USA | 4/23/12  |
| A/swine/lowa/A01203503/2012 | AFN66866 | H3N2 | USA | 5/9/12   |
| A/swine/lowa/A01203566/2012 | AFO82991 | H1N2 | USA | 5/30/12  |
| A/swine/lowa/A01203612/2012 | AFP99691 | H3N2 | USA | 6/30/12  |
| A/swine/lowa/A01203675/2012 | AFR60911 | H1N2 | USA | 7/19/12  |
| A/swine/lowa/A01203943/2012 | AFY08075 | H3N2 | USA | 10/3/12  |
| A/swine/lowa/A01203954/2012 | AFY08087 | H3N2 | USA | 2012/10  |
| A/swine/lowa/A01244088/2012 | AFY08167 | H1N2 | USA | 2012/10  |
| A/swine/lowa/A01244805/2013 | AGT41687 | H3N2 | USA | 2013/07  |
| A/swine/lowa/A01271072/2012 | AFZ15802 | H1N2 | USA | 10/19/12 |
| A/swine/lowa/A01277915/2012 | AGC13515 | H3N2 | USA | 11/26/12 |
| A/swine/lowa/A01280389/2013 | AGG12650 | H1N2 | USA | 1/17/13  |
| A/swine/lowa/A01290302/2013 | AGV74404 | H3N2 | USA | 2013/08  |

|                             |          |      |       |          |
|-----------------------------|----------|------|-------|----------|
| A/swine/lowa/A01290438/2013 | AGZ62303 | H3N2 | USA   | 2013/09  |
| A/swine/lowa/A01300451/2012 | AFU09988 | H3N2 | USA   | 6/25/12  |
| A/swine/lowa/A01379090/2013 | AGK62698 | H1N2 | USA   | 3/20/13  |
| A/swine/lowa/A01432038/2012 | AFY08179 | H1N2 | USA   | 2012/10  |
| A/swine/lowa/A01432105/2012 | AGB84988 | H1N2 | USA   | 2012/11  |
| A/swine/lowa/A01432529/2013 | AGJ73320 | H3N2 | USA   | 2013/03  |
| A/swine/lowa/A01432535/2013 | AGI63942 | H1N2 | USA   | 2013/03  |
| A/swine/lowa/A01432604/2013 | AGK62678 | H1N2 | USA   | 2013/04  |
| A/swine/lowa/A01432784/2013 | AGQ88481 | H1N2 | USA   | 2013/06  |
| A/swine/lowa/A01432817/2013 | AGS08970 | H3N2 | USA   | 2013/06  |
| A/swine/lowa/A01445788/2013 | AGI63922 | H1N2 | USA   | 2/25/13  |
| A/swine/lowa/H02AS8/2002    | ACY66999 | H3N2 | USA   | 2002/11  |
| A/swine/lowa/H03BF5/2003    | ACY67000 | H3N2 | USA   | 2003/08  |
| A/swine/lowa/H03HB4/2003    | ACY66996 | H3N2 | USA   | 2003/02  |
| A/swine/lowa/H03HO7/2003    | ACY66995 | H3N2 | USA   | 2003/06  |
| A/swine/lowa/H03LDH5/2003   | ACY66993 | H3N2 | USA   | 2003/08  |
| A/swine/lowa/SG1290/2007    | AHB51830 | H1N2 | USA   | 4/12/07  |
| A/swine/lowa/SG1469/2004    | AHB22786 | H3N2 | USA   | 10/14/04 |
| A/swine/Italy/107798/2012   | AGR45120 | H1N2 | Italy | 2012     |
| A/swine/Italy/114347-1/2006 | ADR51654 | H1N2 | Italy | 2006     |
| A/swine/Italy/116114/2010   | ADR01748 | H1N2 | Italy | 6/1/10   |
| A/swine/Italy/118616/2010   | AEN68578 | H1N2 | Italy | 2010/06  |
| A/swine/Italy/134110/2011   | AGR45112 | H1N2 | Italy | 2011     |
| A/swine/Italy/1461/96       | CAC40054 | H3N2 | Italy | 1996     |
| A/swine/Italy/1475/96       | CAC86332 | H3N2 | Italy | 1996     |
| A/swine/Italy/149992/2010   | AEN68580 | H1N2 | Italy | 2010/06  |
| A/swine/Italy/1510/98       | CAC86331 | H3N2 | Italy | 1998     |
| A/swine/Italy/1521/98       | CAC86326 | H1N2 | Italy | 1998     |
| A/swine/Italy/15360-3/2001  | AFR76680 | H3N2 | Italy | 2001     |
| A/swine/Italy/166015/2010   | AGR45107 | H1N2 | Italy | 2010     |
| A/swine/Italy/16959/2011    | AGR45111 | H1N2 | Italy | 2011     |
| A/swine/Italy/170177/2010   | AGR45108 | H1N2 | Italy | 2010     |
| A/swine/Italy/18/2000       | ADU85889 | H1N2 | Italy | 2000/01  |
| A/swine/Italy/1850/1977     | ADT79142 | H3N2 | Italy | 1977     |
| A/swine/Italy/186822/2011   | AGR45113 | H1N2 | Italy | 2011     |
| A/swine/Italy/191985/2009   | ADR51655 | H1N2 | Italy | 2009/08  |
| A/swine/Italy/195399/2011   | AGR45114 | H1N2 | Italy | 2011     |
| A/swine/Italy/195639/2010   | AGR45109 | H1N2 | Italy | 2010     |
| A/swine/Italy/196875/2008   | AGR45102 | H1N2 | Italy | 2008     |
| A/swine/Italy/198260/2008   | ADR51656 | H1N2 | Italy | 2008/09  |
| A/swine/Italy/203047/2005   | AGR45096 | H1N2 | Italy | 2005     |
| A/swine/Italy/20333/2006    | AGR45098 | H1N2 | Italy | 2006     |
| A/swine/Italy/2064/99       | CAC86318 | H1N2 | Italy | 1999     |

|                             |          |      |         |          |
|-----------------------------|----------|------|---------|----------|
| A/swine/Italy/22530/2002    | ADR51649 | H1N2 | Italy   | 2002/02  |
| A/swine/Italy/226846/2006   | AGR45099 | H1N2 | Italy   | 2006     |
| A/swine/Italy/232134/2005   | ADR51657 | H1N2 | Italy   | 2005/10  |
| A/swine/Italy/233139/2005   | ADR51658 | H1N2 | Italy   | 2005/10  |
| A/swine/Italy/254261/2010   | AGR45110 | H1N2 | Italy   | 2010     |
| A/swine/Italy/259543/2003   | AEG77149 | H1N2 | Italy   | 2003/10  |
| A/swine/Italy/26654/2012    | AGR45119 | H1N2 | Italy   | 2012     |
| A/swine/Italy/267010/2005   | AGR45097 | H1N2 | Italy   | 2005     |
| A/swine/Italy/269578/2006   | AGR45100 | H1N2 | Italy   | 2006     |
| A/swine/Italy/272121-1/2002 | AFR76719 | H3N2 | Italy   | 2002     |
| A/swine/Italy/274298/2009   | ADU85884 | H1N2 | Italy   | 2009/11  |
| A/swine/Italy/274551/2011   | AGR45115 | H1N2 | Italy   | 2011     |
| A/swine/Italy/282964/2010   | AEN68582 | H1N2 | Italy   | 2010/11  |
| A/swine/Italy/289700/2009   | ADU85885 | H1N2 | Italy   | 2009/11  |
| A/swine/Italy/29141/2008    | AGR45101 | H1N2 | Italy   | 2008     |
| A/swine/Italy/308725/2011   | AGR45116 | H1N2 | Italy   | 2011     |
| A/swine/Italy/310411/2009   | AGR45103 | H1N2 | Italy   | 2009     |
| A/swine/Italy/315977/2011   | AGR45117 | H1N2 | Italy   | 2011     |
| A/swine/Italy/320546/2009   | ADU85886 | H1N2 | Italy   | 2009/12  |
| A/swine/Italy/321986/2009   | ADU85887 | H1N2 | Italy   | 2009/12  |
| A/swine/Italy/329017/2011   | AGR45118 | H1N2 | Italy   | 2011     |
| A/swine/Italy/3592/1999     | ADR51648 | H1N2 | Italy   | 1999     |
| A/swine/Italy/38272/2010    | AEN68574 | H1N2 | Italy   | 2010/02  |
| A/swine/Italy/4675/2003     | ADK98467 | H1N2 | Italy   | 2003/01  |
| A/swine/Italy/50568/2005    | ADR51650 | H1N2 | Italy   | 2005     |
| A/swine/Italy/526/1985      | ADT79152 | H3N2 | Italy   | 1985     |
| A/swine/Italy/53991/2005    | AGR45095 | H1N2 | Italy   | 2005     |
| A/swine/Italy/58769/2010    | ADK48777 | H1N2 | Italy   | 2010     |
| A/swine/Italy/59209/2009    | ADR51646 | H1N2 | Italy   | 2009     |
| A/swine/Italy/6/1981        | ADT79163 | H3N2 | Italy   | 1981     |
| A/swine/Italy/60823/2010    | AEN68576 | H1N2 | Italy   | 2010/03  |
| A/swine/Italy/62/1998       | ADU85888 | H1N2 | Italy   | 1998/02  |
| A/swine/Italy/626-2/2006    | ADR51647 | H1N2 | Italy   | 2006     |
| A/swine/Italy/63580/2010    | AGR45104 | H1N2 | Italy   | 2010     |
| A/swine/Italy/636/87        | CAC40053 | H3N2 | Italy   | 1987     |
| A/swine/Italy/70757/2009    | ADR51651 | H1N2 | Italy   | 2009     |
| A/swine/Italy/76687/2010    | AGR45105 | H1N2 | Italy   | 2010     |
| A/swine/Italy/81062/2009    | ADR51652 | H1N2 | Italy   | 2009     |
| A/swine/Italy/81226/2009    | ADR51653 | H1N2 | Italy   | 2009     |
| A/swine/Italy/85218/2010    | AGR45106 | H1N2 | Italy   | 2010     |
| A/swine/Jena/5/1996         | ABQ97211 | H3N2 | Germany | 1996     |
| A/swine/Jilin/19/2007       | ACZ53969 | H3N2 | China   | 11/9/07  |
| A/swine/Jilin/37/2008       | ACZ53980 | H3N2 | China   | 10/30/08 |

|                                  |          |      |             |          |
|----------------------------------|----------|------|-------------|----------|
| A/swine/Jilin/5/2007             | ACZ53958 | H3N2 | China       | 9/21/07  |
| A/swine/Kanagawa/2/1978          | BAA00619 | H1N2 | Japan       | 1978     |
| A/swine/Kansas/00246/2004        | ABV25652 | H1N2 | USA         | 2004     |
| A/swine/Kansas/015252/2009       | ACV42086 | H3N2 | USA         | 2009     |
| A/swine/Kansas/11-101926/2011    | AEL31697 | H3N2 | USA         | 1/19/11  |
| A/swine/Kansas/11-104465/2011    | AEL31698 | H3N2 | USA         | 2/16/11  |
| A/swine/Kansas/13-105721a/2013   | AGI02557 | H3N2 | USA         | 2/20/13  |
| A/swine/Kansas/13-118657/2013    | AGO51432 | H1N2 | USA         | 2013/05  |
| A/swine/Kansas/A01076181/2009    | AFI62166 | H1N2 | USA         | 12/13/09 |
| A/swine/Karrenzien/2/87          | ABQ97208 | H3N2 | Germany     | 1987     |
| A/swine/Kentucky/02564/2009      | AHB21607 | H1N2 | USA         | 1/30/09  |
| A/swine/Kentucky/02573/2009      | AHB21619 | H1N2 | USA         | 2/10/09  |
| A/swine/Kentucky/12TOSU1054/2012 | AGK62522 | H1N2 | USA         | 11/5/12  |
| A/swine/Kitzen/IDT6142/2007      | ACR39308 | H1N2 | Germany     | 5/11/07  |
| A/swine/Korea/1130/2009          | AFR75838 | H1N2 | South Korea | 2009/01  |
| A/swine/Korea/1204/2009          | AFR75855 | H1N2 | South Korea | 2009/02  |
| A/swine/Korea/A18/2011           | AFR42710 | H3N2 | South Korea | 2011/09  |
| A/swine/Korea/Asan04/2006        | ACE77993 | H1N2 | South Korea | 2006     |
| A/swine/Korea/CAN04/2005         | ACE77999 | H3N2 | South Korea | 2005     |
| A/swine/Korea/CAS05/2004         | ACE77998 | H3N2 | South Korea | 2004     |
| A/swine/Korea/CAS07/2005         | ACE78000 | H3N2 | South Korea | 2005     |
| A/swine/Korea/CAS09/2006         | ACE78001 | H3N2 | South Korea | 2006     |
| A/swine/Korea/CY02-09/2012       | AGE83921 | H3N2 | South Korea | 2/7/12   |
| A/swine/Korea/CY02-10/2012       | AGE83910 | H3N2 | South Korea | 2/20/12  |
| A/swine/Korea/CY02/2002          | AAN46828 | H1N2 | South Korea | 2002     |
| A/swine/Korea/CY03-11/2012       | AGE83899 | H1N2 | South Korea | 3/6/12   |
| A/swine/Korea/CY03-14/2012       | AGE83867 | H3N2 | South Korea | 3/6/12   |
| A/swine/Korea/CY03-15/2012       | AGE83856 | H3N2 | South Korea | 3/6/12   |
| A/swine/Korea/CY03-16/2012       | AGE83845 | H3N2 | South Korea | 3/27/12  |
| A/swine/Korea/CY03-17/2012       | AGE83834 | H3N2 | South Korea | 3/27/12  |
| A/swine/Korea/CY03-18/2012       | AGE83823 | H3N2 | South Korea | 3/27/12  |
| A/swine/Korea/CY03-19/2012       | AGE83812 | H3N2 | South Korea | 3/27/12  |
| A/swine/Korea/CY04/2007          | ACE78002 | H3N2 | South Korea | 2007     |
| A/swine/Korea/CY0423-12/2013     | AGN28826 | H1N2 | South Korea | 4/23/13  |
| A/swine/Korea/CY0423-33/2013     | AGN28814 | H1N2 | South Korea | 4/23/13  |
| A/swine/Korea/CY05/2007          | ACE78003 | H3N2 | South Korea | 2007     |
| A/swine/Korea/CY07/2007          | ACE78004 | H3N2 | South Korea | 2007     |
| A/swine/Korea/CY08/2007          | ACE77997 | H1N2 | South Korea | 2007     |
| A/swine/Korea/CY09/2007          | ACE78005 | H3N2 | South Korea | 2007     |
| A/swine/Korea/CY10/2007          | ACE78006 | H3N2 | South Korea | 2007     |
| A/swine/Korea/CY12-03/2011       | AGE83984 | H1N2 | South Korea | 12/5/11  |
| A/swine/Korea/D79/2011           | AFR42711 | H3N2 | South Korea | 2011/10  |
| A/swine/Korea/Hongsong2/2004     | ACE77989 | H1N2 | South Korea | 2004     |

|                                 |          |      |             |          |
|---------------------------------|----------|------|-------------|----------|
| A/swine/Korea/JL01/2005         | ACE77990 | H1N2 | South Korea | 2005     |
| A/swine/Korea/JL02/2005         | ACE77991 | H1N2 | South Korea | 2005     |
| A/swine/Korea/JL04/2005         | ACE77992 | H1N2 | South Korea | 2005     |
| A/swine/Korea/JNS06/2004        | ACA14275 | H3N2 | South Korea | 2004     |
| A/swine/Korea/KSB/2012          | AFR42709 | H3N2 | South Korea | 2012/03  |
| A/swine/Korea/PL01/2012         | AGS08999 | H3N2 | South Korea | 4/23/12  |
| A/swine/Korea/PZ14/2006         | ACE77996 | H1N2 | South Korea | 2006     |
| A/swine/Korea/PZ4/2006          | ACE77994 | H1N2 | South Korea | 2006     |
| A/swine/Korea/PZ7/2006          | ACE77995 | H1N2 | South Korea | 2006     |
| A/swine/Korea/S11/2005          | ABG34255 | H1N2 | South Korea | 2005     |
| A/swine/Korea/S14/2006          | ABG34262 | H1N2 | South Korea | 2006     |
| A/swine/Korea/S15/2006          | ABG34264 | H1N2 | South Korea | 2006     |
| A/swine/Korea/S5/2005           | ABG34248 | H1N2 | South Korea | 2005     |
| A/swine/Korea/VDS1/2010         | AEI30054 | H1N2 | South Korea | 2010/07  |
| A/swine/Korea/VDS2/2009         | AEI30053 | H1N2 | South Korea | 2009/06  |
| A/swine/Leipzig/145/92          | ABQ97209 | H3N2 | Germany     | 1992     |
| A/swine/Lohne/1/97              | ABQ97212 | H3N2 | Germany     | 1997     |
| A/swine/Manitoba/00446/2005     | AHB22487 | H3N2 | Canada      | 1/25/05  |
| A/swine/Manitoba/01179/2006     | AHB22108 | H3N2 | Canada      | 6/29/06  |
| A/swine/Manitoba/01642/2007     | AHB22120 | H3N2 | Canada      | 6/20/07  |
| A/swine/Manitoba/01643/2007     | AHB22132 | H3N2 | Canada      | 6/20/07  |
| A/swine/Manitoba/01782/2007     | AHB22156 | H3N2 | Canada      | 10/3/07  |
| A/swine/Manitoba/01799/2007     | AHB51451 | H3N2 | Canada      | 10/16/07 |
| A/swine/Manitoba/02182/2008     | AHB22168 | H3N2 | Canada      | 5/30/08  |
| A/swine/Manitoba/02862/2009     | AHB22204 | H3N2 | Canada      | 7/1/09   |
| A/swine/Manitoba/02946/2010     | AHB51487 | H3N2 | Canada      | 1/20/10  |
| A/swine/Manitoba/12707/2005     | ABF17975 | H3N2 | Canada      | 2005     |
| A/swine/Manitoba/SG1431/2008    | AHB22180 | H3N2 | Canada      | 6/17/08  |
| A/swine/Manitoba/SG1432/2008    | AHB22192 | H3N2 | Canada      | 6/17/08  |
| A/swine/Manitoba/SG1438/2011    | AHB22228 | H3N2 | Canada      | 11/8/11  |
| A/swine/Maryland/A01104040/2012 | AFV71463 | H3N2 | USA         | 8/15/12  |
| A/swine/Maryland/A01319694/2013 | AGS42036 | H3N2 | USA         | 4/10/13  |
| A/swine/Melle/IDT5706/2006      | ACR39310 | H3N2 | Germany     | 11/16/06 |
| A/swine/Mexico/SG1442/2010      | AHB22240 | H3N2 | Mexico      | 11/29/10 |
| A/swine/Mexico/SG1444/2011      | AHB22558 | H3N2 | Mexico      | 10/21/11 |
| A/swine/Mexico/SG1447/2011      | AHB24768 | H3N2 | Mexico      | 10/21/11 |
| A/swine/Mexico/SG1448/2011      | AHB24779 | H3N2 | Mexico      | 10/21/11 |
| A/swine/Mexico/SG1449/2011      | AHB22274 | H3N2 | Mexico      | 10/21/11 |
| A/swine/Michigan/A01202037/2011 | AET09992 | H1N2 | USA         | 5/26/11  |
| A/swine/Mie/R02/2012            | BAM78386 | H1N2 | Japan       | 1/19/12  |
| A/swine/Minnesota/001332/2006   | AEO91891 | H3N2 | USA         | 11/17/06 |
| A/swine/Minnesota/001444/2007   | AEO91869 | H3N2 | USA         | 1/19/07  |
| A/swine/Minnesota/00484/2005    | AEO91913 | H3N2 | USA         | 1/20/05  |

|                                  |          |      |     |          |
|----------------------------------|----------|------|-----|----------|
| A/swine/Minnesota/00611/2005     | AEO91771 | H3N2 | USA | 5/20/05  |
| A/swine/Minnesota/00709/2005     | AEO91659 | H3N2 | USA | 8/18/05  |
| A/swine/Minnesota/01146/2006     | AEO91624 | H3N2 | USA | 5/25/06  |
| A/swine/Minnesota/01604/2007     | AHB21332 | H1N2 | USA | 5/1/07   |
| A/swine/Minnesota/01862/2007     | AEO91727 | H3N2 | USA | 11/20/07 |
| A/swine/Minnesota/02011/2008     | ADM18070 | H1N2 | USA | 2008     |
| A/swine/Minnesota/02324/2008     | AEO91858 | H1N2 | USA | 9/10/08  |
| A/swine/Minnesota/02782/2009     | AEO91716 | H3N2 | USA | 5/7/09   |
| A/swine/Minnesota/02852/2009     | AHB51427 | H1N2 | USA | 6/5/09   |
| A/swine/Minnesota/1145/2007      | ACJ03980 | H3N2 | USA | 2007     |
| A/swine/Minnesota/1192/2001      | ABV25649 | H1N2 | USA | 2001     |
| A/swine/Minnesota/1300/2007      | ACK43229 | H3N2 | USA | 1/31/07  |
| A/swine/Minnesota/18/2012        | AFU83163 | H3N2 | USA | 9/10/12  |
| A/swine/Minnesota/239105/2009    | ADY80100 | H3N2 | USA | 11/24/09 |
| A/swine/Minnesota/3236/2007      | ACK43233 | H1N2 | USA | 1/30/07  |
| A/swine/Minnesota/3239/2007      | ACK43234 | H1N2 | USA | 2/7/07   |
| A/swine/Minnesota/4/2012         | AFM93983 | H3N2 | USA | 6/6/12   |
| A/swine/Minnesota/44837-3/2009   | ADP05213 | H1N2 | USA | 11/23/09 |
| A/Swine/Minnesota/55551/2000     | AAL87884 | H1N2 | USA | 2000     |
| A/swine/Minnesota/5763/2003      | AEN94855 | H1N2 | USA | 2003     |
| A/swine/Minnesota/578/2007       | ACK43227 | H3N2 | USA | 1/24/07  |
| A/Swine/Minnesota/593/99         | AAG01786 | H3N2 | USA | 1999     |
| A/swine/Minnesota/5947/2007      | ACK43230 | H3N2 | USA | 2/20/07  |
| A/swine/Minnesota/65767/2006     | ACK43224 | H3N2 | USA | 12/26/06 |
| A/swine/Minnesota/66743/2006     | ACK43232 | H3N2 | USA | 12/26/06 |
| A/swine/Minnesota/66853/2006     | ACK43225 | H3N2 | USA | 12/26/06 |
| A/swine/Minnesota/66960/2006     | ACK43226 | H3N2 | USA | 12/26/06 |
| A/swine/Minnesota/761/2007       | ACK43228 | H3N2 | USA | 2007     |
| A/swine/Minnesota/7931/2007      | ACK43231 | H3N2 | USA | 2/28/07  |
| A/Swine/Minnesota/9088-2/98      | AAD51245 | H3N2 | USA | 1998     |
| A/swine/Minnesota/A00907734/2011 | AFH53685 | H3N2 | USA | 8/4/11   |
| A/swine/Minnesota/A01047604/2010 | ADZ96080 | H1N2 | USA | 12/7/10  |
| A/swine/Minnesota/A01047911/2010 | AFI62167 | H1N2 | USA | 11/18/10 |
| A/swine/Minnesota/A01047913/2010 | AFI62168 | H1N2 | USA | 12/2/10  |
| A/swine/Minnesota/A01049346/2010 | AEI87769 | H3N2 | USA | 12/29/10 |
| A/swine/Minnesota/A01076183/2009 | AFU10182 | H1N2 | USA | 12/28/09 |
| A/swine/Minnesota/A01076193/2010 | AFM78660 | H3N2 | USA | 2/14/10  |
| A/swine/Minnesota/A01076197/2010 | AFM78665 | H1N2 | USA | 3/7/10   |
| A/swine/Minnesota/A01076209/2010 | AFI62170 | H1N2 | USA | 5/2/10   |
| A/swine/Minnesota/A01076210/2010 | AFI62171 | H1N2 | USA | 5/9/10   |
| A/swine/Minnesota/A01076218/2010 | AEZ02286 | H3N2 | USA | 8/1/10   |
| A/swine/Minnesota/A01076999/2010 | AFH53716 | H3N2 | USA | 9/22/10  |
| A/swine/Minnesota/A01116195/2011 | AFH53695 | H3N2 | USA | 8/29/11  |



|                                    |          |      |     |          |
|------------------------------------|----------|------|-----|----------|
| A/swine/Minnesota/A01116364/2010   | AFN07969 | H1N2 | USA | 9/4/10   |
| A/swine/Minnesota/A01134226/2011   | AFI62180 | H1N2 | USA | 1/30/11  |
| A/swine/Minnesota/A01134332/2010   | AFJ19121 | H1N2 | USA | 9/20/10  |
| A/swine/Minnesota/A01134341/2010   | AFJ19128 | H1N2 | USA | 5/4/10   |
| A/swine/Minnesota/A01201102/2011   | AFI62188 | H1N2 | USA | 4/4/11   |
| A/swine/Minnesota/A01201296/2011   | AFN08151 | H1N2 | USA | 4/18/11  |
| A/swine/Minnesota/A01202453/2011   | AFM46701 | H1N2 | USA | 7/14/11  |
| A/swine/Minnesota/A01202454/2011   | AFM46702 | H1N2 | USA | 7/14/11  |
| A/swine/Minnesota/A01244318/2012   | AGB08504 | H1N2 | USA | 2012/11  |
| A/swine/Minnesota/A01267716/2012   | AFX65239 | H1N2 | USA | 10/10/12 |
| A/swine/Minnesota/A01267989/2012   | AFZ15936 | H3N2 | USA | 10/29/12 |
| A/swine/Minnesota/A01270872/2012   | AFY08115 | H3N2 | USA | 10/15/12 |
| A/swine/Minnesota/A01279105/2012   | AFZ77467 | H1N2 | USA | 11/2/12  |
| A/swine/Minnesota/A01279377/2012   | AGB07688 | H3N2 | USA | 11/21/12 |
| A/swine/Minnesota/A01280462/2013   | AGG12658 | H3N2 | USA | 1/23/13  |
| A/swine/Minnesota/A01300213/2012   | AFU10028 | H3N2 | USA | 6/15/12  |
| A/swine/Minnesota/A01301665/2012   | AFV68318 | H3N2 | USA | 9/4/12   |
| A/swine/Minnesota/A01327433/2012   | AFU08899 | H1N2 | USA | 4/6/12   |
| A/swine/Minnesota/A01327667/2012   | AFU10201 | H1N2 | USA | 4/23/12  |
| A/swine/Minnesota/A01327767/2012   | AFU08603 | H1N2 | USA | 4/23/12  |
| A/swine/Minnesota/A01327768/2012   | AFU08991 | H3N2 | USA | 4/23/12  |
| A/swine/Minnesota/A01350216/2013   | AGN69818 | H1N2 | USA | 4/29/13  |
| A/swine/Minnesota/A01351603/2013   | AGT18696 | H3N2 | USA | 7/11/13  |
| A/swine/Minnesota/A01364816/2013   | AHA11422 | H3N2 | USA | 9/13/13  |
| A/swine/Minnesota/A01392534/2013   | AHA11512 | H3N2 | USA | 10/3/13  |
| A/swine/Minnesota/A01397282/2013   | AGS08786 | H3N2 | USA | 6/24/13  |
| A/swine/Minnesota/A01432544/2013   | AGJ73300 | H3N2 | USA | 2013/03  |
| A/swine/Minnesota/A01432889/2013   | AGT41804 | H1N2 | USA | 2013/07  |
| A/swine/Minnesota/A01442124/2012   | AGC13543 | H1N2 | USA | 12/4/12  |
| A/swine/Minnesota/SG1133/2008      | AEO91815 | H1N2 | USA | 4/28/08  |
| A/swine/Minnesota/SG1176/2003      | AHB51235 | H3N2 | USA | 6/17/03  |
| A/swine/Minnesota/SG1183/2003      | AHB52016 | H1N2 | USA | 1/2/03   |
| A/swine/Minnesota/SG1236/2005      | AHB20970 | H3N2 | USA | 4/22/05  |
| A/swine/Minnesota/SG1238/2005      | AHB20982 | H3N2 | USA | 6/2/05   |
| A/swine/Minnesota/SG1293/2007      | AHB21344 | H3N2 | USA | 4/6/07   |
| A/swine/Minnesota/SG1294/2007      | AHB21356 | H3N2 | USA | 4/5/07   |
| A/swine/Minnesota/SG1402/2011      | AHB22012 | H1N2 | USA | 10/6/11  |
| A/swine/Minnesota/SG239/2007       | ACS92960 | H1N2 | USA | 2/23/07  |
| A/swine/Mississippi/A01049443/2011 | AEZ54178 | H1N2 | USA | 1/19/11  |
| A/swine/Missouri/00355/2004        | AHB51319 | H3N2 | USA | 7/30/04  |
| A/swine/Missouri/A01241610/2012    | AFU08643 | H3N2 | USA | 2/14/12  |
| A/swine/Missouri/A01241619/2012    | AFU08715 | H3N2 | USA | 2/14/12  |
| A/swine/Missouri/A01270665/2012    | AFX65294 | H1N2 | USA | 10/2/12  |

|                                      |          |      |          |          |
|--------------------------------------|----------|------|----------|----------|
| A/swine/Missouri/A01444795/2013      | AGG12609 | H1N2 | USA      | 1/22/13  |
| A/swine/Missouri/SG1343/2009         | AHB51439 | H1N2 | USA      | 9/16/09  |
| A/swine/Miyagi/5/2003                | BAF03574 | H1N2 | Japan    | 2003     |
| A/swine/Miyazaki/1/2006              | BAG49622 | H1N2 | Japan    | 2006     |
| A/swine/Morbihan/0028/2007           | CAO82685 | H1N2 | France   | 2/5/07   |
| A/swine/Nagasaki/1/1989              | BAA06131 | H1N2 | Japan    | 1989     |
| A/swine/Nagasaki/1/1990              | BAA06132 | H1N2 | Japan    | 1990     |
| A/swine/Nakhon pathom/NIAH586-1/2005 | ABY40401 | H3N2 | Thailand | 2005     |
| A/swine/Nakhon pathom/NIAH586-2/2005 | ABY40402 | H3N2 | Thailand | 2005     |
| A/swine/Nebraska/00188/2003          | AHB22618 | H3N2 | USA      | 10/3/03  |
| A/swine/Nebraska/00386/2004          | AHB23220 | H3N2 | USA      | 8/13/04  |
| A/swine/Nebraska/01711/2007          | AHB21320 | H3N2 | USA      | 7/31/07  |
| A/swine/Nebraska/02866/2009          | AHB52258 | H1N2 | USA      | 7/8/09   |
| A/Swine/Nebraska/209/98              | AAG01759 | H3N2 | USA      | 1998     |
| A/swine/Nebraska/A01049648/2011      | AEP17249 | H1N2 | USA      | 3/7/11   |
| A/swine/Nebraska/A01116980/2011      | AFH53697 | H3N2 | USA      | 11/2/11  |
| A/swine/Nebraska/A01116984/2011      | AFN08395 | H3N2 | USA      | 11/3/11  |
| A/swine/Nebraska/A01240337/2011      | AFU10096 | H3N2 | USA      | 11/21/11 |
| A/swine/Nebraska/A01240867/2012      | AFU10068 | H3N2 | USA      | 1/3/12   |
| A/swine/Nebraska/A01300022/2012      | AFU09936 | H3N2 | USA      | 6/25/12  |
| A/swine/Nebraska/A01300032/2012      | AFO82947 | H3N2 | USA      | 6/12/12  |
| A/swine/Nebraska/A01300759/2012      | AFU09956 | H1N2 | USA      | 7/20/12  |
| A/swine/Nebraska/A01301501/2012      | AFV33935 | H1N2 | USA      | 8/27/12  |
| A/swine/Nebraska/A01327747/2012      | AFU08987 | H3N2 | USA      | 4/26/12  |
| A/swine/Nebraska/A01399268/2013      | AGY14426 | H3N2 | USA      | 8/9/13   |
| A/swine/Nebraska/A01399873/2013      | AGZ62249 | H1N2 | USA      | 9/16/13  |
| A/swine/Nebraska/A01442053/2012      | AGC13527 | H1N2 | USA      | 12/2/12  |
| A/swine/Nebraska/A01443969/2013      | AGK62702 | H1N2 | USA      | 3/19/13  |
| A/swine/Nebraska/SG1178/2003         | AHB51247 | H3N2 | USA      | 8/6/03   |
| A/swine/New Mexico/SG1158/2003       | AHB51115 | H3N2 | USA      | 6/19/03  |
| A/swine/Niigata/729/2004             | BAK23285 | H1N2 | Japan    | 2004     |
| A/swine/Nordkirchen/IDT1993/2003     | ACF94711 | H3N2 | Germany  | 2003/04  |
| A/swine/North Carolina/00116/2003    | AHB51523 | H3N2 | USA      | 7/2/03   |
| A/swine/North Carolina/00950/2006    | AHB24813 | H3N2 | USA      | 9/27/06  |
| A/swine/North Carolina/01052/2006    | AHB22954 | H3N2 | USA      | 3/14/06  |
| A/swine/North Carolina/01169/2006    | AHB21078 | H1N2 | USA      | 6/22/06  |
| A/swine/North Carolina/01216/2006    | AHB22978 | H3N2 | USA      | 8/16/06  |
| A/swine/North Carolina/01312/2006    | AHB21090 | H3N2 | USA      | 11/16/06 |
| A/swine/North Carolina/01469/2007    | AHB23002 | H3N2 | USA      | 2/21/07  |
| A/swine/North Carolina/01484/2006    | AHB21102 | H3N2 | USA      | 11/3/06  |
| A/swine/North Carolina/01506/2006    | AHB22942 | H3N2 | USA      | 10/31/06 |
| A/swine/North Carolina/01930/2007    | AHB21284 | H3N2 | USA      | 7/27/07  |
| A/swine/North Carolina/02249/2008    | AHB21463 | H1N2 | USA      | 7/30/08  |

|                                                   |          |      |             |          |
|---------------------------------------------------|----------|------|-------------|----------|
| A/swine/North Carolina/2003                       | ABQ41900 | H3N2 | USA         | 2003     |
| A/Swine/North Carolina/35922/98                   | AAD51243 | H3N2 | USA         | 1998     |
| A/swine/North Carolina/44837-2/2009               | ADP05209 | H1N2 | USA         | 11/15/09 |
| A/swine/North Carolina/44837-4/2009               | ADP05217 | H1N2 | USA         | 12/21/09 |
| A/Swine/North Carolina/93523/01                   | AAL87883 | H1N2 | USA         | 2001     |
| A/Swine/North Carolina/98225/01                   | AAL87882 | H1N2 | USA         | 2001     |
| A/swine/North Carolina/A01049085/2010             | AEC23316 | H1N2 | USA         | 11/16/10 |
| A/swine/North Carolina/A01076178/2009             | AEZ02124 | H3N2 | USA         | 12/6/09  |
| A/swine/North Carolina/A01076199/2010             | AEZ02181 | H3N2 | USA         | 3/14/10  |
| A/swine/North Carolina/A01076204/2010             | AEZ02265 | H3N2 | USA         | 4/18/10  |
| A/swine/North Carolina/A01202766/2011             | AEZ54181 | H3N2 | USA         | 10/20/11 |
| A/swine/North Carolina/A01203801/2012             | AFW16012 | H3N2 | USA         | 2012/09  |
| A/swine/North Carolina/A01270393/2011             | AFV68690 | H1N2 | USA         | 12/8/11  |
| A/swine/North Carolina/A01290462/2013             | AGZ62320 | H1N2 | USA         | 2013/09  |
| A/swine/North Carolina/A01290473/2013             | AGZ62352 | H1N2 | USA         | 2013/09  |
| A/swine/North Carolina/A01432533/2013             | AGI63946 | H1N2 | USA         | 2013/03  |
| A/swine/North Carolina/A01432766/2013             | AGQ88461 | H1N2 | USA         | 2013/06  |
| A/swine/North Carolina/A01432948/2013             | AGU69958 | H1N2 | USA         | 2013/08  |
| A/swine/North Carolina/R08-001877-D08-013371/2008 | ACS92897 | H3N2 | USA         | 2008     |
| A/swine/North Carolina/SG1171/2003                | AHB51913 | N2   | USA         | 9/12/03  |
| A/swine/North Carolina/SG1197/2004                | AHB20847 | H3N2 | USA         | 12/30/04 |
| A/swine/North Carolina/SG1199/2004                | AHB23209 | H3N2 | USA         | 12/2/04  |
| A/swine/North Carolina/SG1230/2005                | AHB20958 | H3N2 | USA         | 3/16/05  |
| A/swine/North Carolina/SG1232/2005                | AHB51368 | H1N2 | USA         | 1/27/05  |
| A/swine/North Carolina/SG1306/2008                | AHB21439 | H3N2 | USA         | 7/3/08   |
| A/swine/North Carolina/SG1335/2009                | AHB22393 | H1N2 | USA         | 1/20/09  |
| A/swine/North Carolina/SG1335/2009                | AHB21643 | H1N2 | USA         | 1/20/09  |
| A/swine/North Carolina/SG1338/2009                | AHB21655 | H3N2 | USA         | 2/6/09   |
| A/swine/North Carolina/SG1357/2010                | AHB21739 | H1N2 | USA         | 1/13/10  |
| A/swine/North Carolina/SG1359/2010                | AHB24456 | H1N2 | USA         | 2/19/10  |
| A/swine/North Carolina/SG1364/2010                | AHB24493 | H3N2 | USA         | 11/24/10 |
| A/swine/North Carolina/SG1391/2011                | AHB21964 | H1N2 | USA         | 3/30/11  |
| A/swine/North Carolina/SG1462/2004                | AHB22702 | H3N2 | USA         | 3/3/04   |
| A/swine/North Carolina/SG1464/2004                | AHB22726 | H3N2 | USA         | 3/10/04  |
| A/Swine/North Carolina/16497/99                   | AAG10751 | H3N2 | USA         | 1999     |
| A/swine/Obihiro/10/1985                           | BAH98104 | H3N2 | Japan       | 1985     |
| A/swine/Oedenrode/7c/1996                         | ADT79173 | H3N2 | Netherlands | 1996     |
| A/swine/Ohio/09SW1477/2009                        | AGB98494 | H1N2 | USA         | 7/5/09   |
| A/swine/Ohio/09SW1484E/2009                       | AGB98450 | H1N2 | USA         | 7/5/09   |
| A/swine/Ohio/09SW77M/2009                         | AGB98747 | H3N2 | USA         | 8/8/09   |
| A/swine/Ohio/09SW79E/2009                         | AGB98659 | H3N2 | USA         | 8/8/09   |
| A/swine/Ohio/09SW84/2009                          | AGB98835 | H3N2 | USA         | 8/13/09  |

|                              |          |      |     |         |
|------------------------------|----------|------|-----|---------|
| A/swine/Ohio/09SW91/2009     | AGB98901 | H3N2 | USA | 8/13/09 |
| A/swine/Ohio/1/2012          | AFM76628 | H3N2 | USA | 2012/06 |
| A/swine/Ohio/11SW146/2011    | AGB99704 | H1N2 | USA | 8/7/11  |
| A/swine/Ohio/11SW193/2011    | AGN69700 | H1N2 | USA | 8/31/11 |
| A/swine/Ohio/11SW214/2011    | AGN69784 | H3N2 | USA | 8/31/11 |
| A/swine/Ohio/11SW224/2011    | AGC00217 | H1N2 | USA | 8/18/11 |
| A/swine/Ohio/12TOSU138/2012  | AGK24539 | H3N2 | USA | 7/12/12 |
| A/swine/Ohio/12TOSU268/2012  | AFR61064 | H3N2 | USA | 7/28/12 |
| A/swine/Ohio/12TOSU307/2012  | AFR78032 | H3N2 | USA | 8/3/12  |
| A/swine/Ohio/12TOSU308/2012  | AGK24527 | H3N2 | USA | 8/3/12  |
| A/swine/Ohio/12TOSU325/2012  | AGK24479 | H3N2 | USA | 8/3/12  |
| A/swine/Ohio/12TOSU338/2012  | AGK62618 | H3N2 | USA | 8/3/12  |
| A/swine/Ohio/12TOSU363/2012  | AGG12616 | H3N2 | USA | 2012/08 |
| A/swine/Ohio/12TOSU371/2012  | AGG53719 | H3N2 | USA | 8/3/12  |
| A/swine/Ohio/12TOSU420/2012  | AFR78021 | H3N2 | USA | 8/6/12  |
| A/swine/Ohio/12TOSU421/2012  | AGK62570 | H3N2 | USA | 8/6/12  |
| A/swine/Ohio/12TOSU439/2012  | AGK62546 | H3N2 | USA | 8/6/12  |
| A/swine/Ohio/12TOSU447/2012  | AFR78043 | H3N2 | USA | 8/9/12  |
| A/swine/Ohio/12TOSU450/2012  | AFR78054 | H3N2 | USA | 8/9/12  |
| A/swine/Ohio/12TOSU467/2012  | AFR78076 | H3N2 | USA | 8/9/12  |
| A/swine/Ohio/12TOSU483/2012  | AFX68986 | H3N2 | USA | 8/10/12 |
| A/swine/Ohio/12TOSU484/2012  | AFX68975 | H3N2 | USA | 8/10/12 |
| A/swine/Ohio/12TOSU50/2012   | AGK62462 | H3N2 | USA | 6/22/12 |
| A/swine/Ohio/12TOSU52/2012   | AGK62474 | H3N2 | USA | 6/22/12 |
| A/swine/Ohio/7/2012          | AFN22008 | H3N2 | USA | 2012/06 |
| A/Swine/Ohio/891/01          | AAL87881 | H1N2 | USA | 2001    |
| A/swine/Ohio/A00138552/2012  | AFX69015 | H3N2 | USA | 9/2/12  |
| A/swine/Ohio/A01133466/2012  | AFV71441 | H3N2 | USA | 8/6/12  |
| A/swine/Ohio/A01203624/2012  | AFP99692 | H3N2 | USA | 7/12/12 |
| A/swine/Ohio/A01279522/2012  | AGC13604 | H1N2 | USA | 12/4/12 |
| A/swine/Ohio/A01280112/2013  | AGF69078 | H1N2 | USA | 1/4/13  |
| A/swine/Ohio/A01349305/2013  | AGJ73393 | H3N2 | USA | 3/12/13 |
| A/swine/Ohio/A01349495/2013  | AGJ73409 | H3N2 | USA | 3/22/13 |
| A/swine/Ohio/A01349615/2013  | AGK72338 | H3N2 | USA | 3/29/13 |
| A/swine/Ohio/A01351710/2013  | AGT41964 | H3N2 | USA | 7/18/13 |
| A/swine/Ohio/FAH10-1/2010    | ADU85902 | H1N2 | USA | 10/1/10 |
| A/swine/Ohio/FAH11-1/2010    | AEO09140 | H1N2 | USA | 11/1/10 |
| A/swine/Oklahoma/001142/2009 | ACV42075 | H3N2 | USA | 2009    |
| A/swine/Oklahoma/00141/2003  | AHB51187 | H3N2 | USA | 8/28/03 |
| A/swine/Oklahoma/00142/2003  | AHB51127 | H3N2 | USA | 8/28/03 |
| A/swine/Oklahoma/00153/2003  | AHB51151 | H3N2 | USA | 9/18/03 |
| A/swine/Oklahoma/00259/2004  | AHB22666 | H1N2 | USA | 3/3/04  |
| A/swine/Oklahoma/00518/2005  | AHB22297 | H3N2 | USA | 3/1/05  |

|                                     |          |      |         |          |
|-------------------------------------|----------|------|---------|----------|
| A/swine/Oklahoma/00606/2005         | AHB23233 | H3N2 | USA     | 5/4/05   |
| A/swine/Oklahoma/008722/2007        | ACV42097 | H3N2 | USA     | 2007     |
| A/swine/Oklahoma/01117/2006         | AHB22309 | H1N2 | USA     | 5/2/06   |
| A/swine/Oklahoma/011506/2007        | ACV42108 | H3N2 | USA     | 2007     |
| A/swine/Oklahoma/011521-4/2008      | ACV42218 | H1N2 | USA     | 2008     |
| A/swine/Oklahoma/01382/2006         | AHB22930 | H1N2 | USA     | 12/6/06  |
| A/swine/Oklahoma/01452/2007         | AHB52210 | H1N2 | USA     | 1/26/07  |
| A/swine/Oklahoma/01741/2007         | AHB21234 | H1N2 | USA     | 8/23/07  |
| A/swine/Oklahoma/02056/2008         | AHB21416 | H1N2 | USA     | 2/29/08  |
| A/swine/Oklahoma/02083/2008         | AHB52246 | H1N2 | USA     | 3/6/08   |
| A/swine/Oklahoma/02107/2008         | AHB21404 | H1N2 | USA     | 4/2/08   |
| A/swine/Oklahoma/02530/2009         | AHB23813 | H3N2 | USA     | 1/9/09   |
| A/swine/Oklahoma/02722/2009         | AHB23050 | H1N2 | USA     | 4/10/09  |
| A/swine/Oklahoma/032726/2008        | ACV42031 | H1N2 | USA     | 2008     |
| A/swine/Oklahoma/042169/2008        | ACV42295 | H1N2 | USA     | 2008     |
| A/swine/Oklahoma/053259/2008        | ACV42064 | H1N2 | USA     | 2008     |
| A/Swine/Oklahoma/18089/99           | AAG10752 | H3N2 | USA     | 1999     |
| A/Swine/Oklahoma/18717/99           | AAG10748 | H3N2 | USA     | 1999     |
| A/swine/Oklahoma/A01049500/2011     | AEP17236 | H1N2 | USA     | 2/3/11   |
| A/swine/Oklahoma/A01202498/2011     | AFM46707 | H1N2 | USA     | 8/8/11   |
| A/swine/Oklahoma/A01203507/2012     | AFN66867 | H1N2 | USA     | 4/10/12  |
| A/swine/Oklahoma/A01203865/2012     | AFW16000 | H1N2 | USA     | 2012/09  |
| A/swine/Oklahoma/A01327676/2012     | AFU08787 | H3N2 | USA     | 4/19/12  |
| A/swine/Oklahoma/A01432577/2013     | AGK24182 | H1N2 | USA     | 2013/03  |
| A/swine/Oklahoma/SG1216/2005        | AHB20934 | H3N2 | USA     | 3/3/05   |
| A/swine/Oklahoma/SG1473/2005        | AHB22834 | H3N2 | USA     | 9/23/05  |
| A/swine/Ontario/00130/97            | AAG01750 | H3N2 | Canada  | 1997     |
| A/swine/Ontario/33853/2005          | ABF17976 | H3N2 | Canada  | 2005     |
| A/swine/Ontario/48235/04            | ABB86928 | H1N2 | Canada  | 2004     |
| A/swine/Ontario/52156/03            | ABB86916 | H1N2 | Canada  | 2003     |
| A/swine/Ontario/55383/04            | ABB86898 | H1N2 | Canada  | 2004     |
| A/swine/Pennsylvania/62170-2/2010   | ADZ96093 | H3N2 | USA     | 10/25/10 |
| A/swine/Pennsylvania/62170-4/2010   | ADZ96095 | H3N2 | USA     | 10/25/10 |
| A/swine/Pennsylvania/A01076501/2010 | AFN22073 | H3N2 | USA     | 2010/09  |
| A/swine/Pennsylvania/a01076502/2010 | AFH41315 | H3N2 | USA     | 9/20/10  |
| A/swine/Pennsylvania/a01076503/2010 | AFH41305 | H3N2 | USA     | 9/20/10  |
| A/swine/Pennsylvania/A01104049/2012 | AFX68926 | H3N2 | USA     | 8/9/12   |
| A/swine/Pennsylvania/A01104050/2012 | AGB84918 | H3N2 | USA     | 8/9/12   |
| A/swine/Pingtung/7-12/1999          | ACN90996 | H1N2 | Taiwan  | 1/6/99   |
| A/swine/Pingtung/92-2/2003          | AAT12708 | H1N2 | Taiwan  | 6/25/03  |
| A/swine/Ploufragan/0214/2006        | AFR76769 | H1N2 | France  | 9/2/06   |
| A/swine/Potsdam/35/82               | ABQ97207 | H3N2 | Germany | 1982     |
| A/swine/QC/1685-1/2009              | ADV58857 | H3N2 | Canada  | 5/15/09  |

|                                     |          |      |          |          |
|-------------------------------------|----------|------|----------|----------|
| A/swine/QC/1685-5/2009              | ADV58858 | H3N2 | Canada   | 5/15/09  |
| A/swine/QC/1698-1/2009              | ADV58859 | H3N2 | Canada   | 5/15/09  |
| A/swine/QC/1698-2/2009              | ADV58860 | H3N2 | Canada   | 5/15/09  |
| A/swine/QC/1698-4/2009              | ADV58861 | H3N2 | Canada   | 5/15/09  |
| A/swine/QC/1698-5/2009              | ADV58862 | H3N2 | Canada   | 5/15/09  |
| A/swine/QC/1840-2/2009              | ADV58863 | H3N2 | Canada   | 5/28/09  |
| A/swine/QC/2108-2/2009              | ADV58864 | H3N2 | Canada   | 4/3/09   |
| A/swine/QC/382/2009                 | ADV58855 | H3N2 | Canada   | 5/8/09   |
| A/swine/QC/414/2009                 | ADV58854 | H3N2 | Canada   | 5/22/09  |
| A/swine/QC/440-A/2009               | ADV58856 | H3N2 | Canada   | 5/29/09  |
| A/swine/Quebec/00686/2005           | AHB24661 | H3N2 | Canada   | 9/14/05  |
| A/swine/Quebec/01000/2006           | AHB24686 | H3N2 | Canada   | 2/23/06  |
| A/swine/Quebec/01001/2006           | AHB22084 | H3N2 | Canada   | 2/23/06  |
| A/swine/Quebec/01002/2006           | AHB24699 | H3N2 | Canada   | 2/23/06  |
| A/swine/Quebec/01003/2006           | AHB24711 | H3N2 | Canada   | 2/23/06  |
| A/swine/Quebec/1257774/2010         | AEN68516 | H3N2 | Canada   | 11/9/10  |
| A/swine/Quebec/1257777/2010         | AEN68526 | H3N2 | Canada   | 11/8/10  |
| A/swine/Quebec/1262080/2010         | AEN68506 | H3N2 | Canada   | 12/1/10  |
| A/swine/Quebec/1265553/2010         | ADZ96195 | H3N2 | Canada   | 12/22/10 |
| A/swine/Quebec/1267566/2011         | AEN68535 | H3N2 | Canada   | 1/6/11   |
| A/swine/Quebec/1267568/2010         | AEM91954 | H3N2 | Canada   | 12/30/10 |
| A/swine/Quebec/4001/2005            | ACF04393 | H3N2 | Canada   | 7/12/05  |
| A/swine/Ratchaburi/NIAH59/2004      | BAH02132 | H3N2 | Thailand | 2004     |
| A/swine/Ratchaburi/NIAH874/2005     | ABY40403 | H3N2 | Thailand | 2005     |
| A/swine/Ratchaburi/NIAH9426/2005    | ABY40404 | H3N2 | Thailand | 2005     |
| A/swine/Re220/92hp                  | ABV60700 | H3N2 | Germany  | 1992     |
| A/swine/Saitama/1/2000              | BAK23286 | H1N2 | Japan    | 2000     |
| A/swine/Saitama/1996                | BAH02182 | H1N2 | Japan    | 1996     |
| A/swine/Saitama/21/2004             | BAK23287 | H1N2 | Japan    | 2004     |
| A/swine/Saraburi/NIAH107725-28/2008 | BAL70446 | H3N2 | Thailand | 2008/06  |
| A/swine/Saraburi/NIAH109713-36/2009 | BAL70456 | H3N2 | Thailand | 2009/07  |
| A/swine/Saraburi/NIAH13021/2005     | ABY40398 | H1N2 | Thailand | 2005     |
| A/swine/Saskatchewan/01114/2006     | AHB22096 | H3N2 | Canada   | 5/1/06   |
| A/swine/Saskatchewan/01834/2007     | AHB51463 | H3N2 | Canada   | 10/29/07 |
| A/swine/Saskatchewan/02903/2009     | AHB22216 | H3N2 | Canada   | 9/24/09  |
| A/swine/Saskatchewan/SD0001/2011    | AHB22535 | H3N2 | Canada   | 12/1/11  |
| A/swine/Scotland/410440/94          | CAC86322 | H1N2 | UK       | 1994     |
| A/swine/SD/31813/2009               | ADB82973 | H1N2 | USA      | 11/20/09 |
| A/swine/Shandong/3/2005             | ABV55862 | H3N2 | China    | 2005     |
| A/swine/Shanghai/1/2007             | ACI48764 | H1N2 | China    | 3/24/07  |
| A/swine/Shizuoka/120/97             | AAO15353 | H3N2 | Japan    | 1997     |
| A/swine/South Dakota/152B/2009      | ADU85825 | H1N2 | USA      | 9/4/09   |
| A/swine/South Dakota/3/2010         | ADU04727 | H1N2 | USA      | 11/23/10 |

|                                     |          |      |        |          |
|-------------------------------------|----------|------|--------|----------|
| A/swine/South Dakota/3/2012         | AFM93979 | H3N2 | USA    | 2012/06  |
| A/swine/South Dakota/4/2010         | ADW93973 | H1N2 | USA    | 12/28/10 |
| A/swine/South Dakota/A01279746/2012 | AGC13636 | H1N2 | USA    | 12/7/12  |
| A/swine/South Dakota/A01280095/2013 | AGF69074 | H3N2 | USA    | 1/3/13   |
| A/swine/South Dakota/A01349341/2013 | AGJ73401 | H1N2 | USA    | 3/13/13  |
| A/swine/South Dakota/A01350210/2013 | AGN69822 | H1N2 | USA    | 4/29/13  |
| A/swine/South Dakota/A01350220/2013 | AGN69826 | H1N2 | USA    | 4/29/13  |
| A/swine/South Dakota/A01350758/2013 | AGO59901 | H1N2 | USA    | 5/28/13  |
| A/swine/South Dakota/A01350778/2013 | AGO59905 | H1N2 | USA    | 5/29/13  |
| A/swine/South Dakota/SG1453/2003    | AHB22594 | H3N2 | USA    | 4/10/03  |
| A/swine/Spain/08/2011               | AFV33873 | H1N2 | Spain  | 7/1/11   |
| A/swine/Spain/09/2010               | AFV33906 | H1N2 | Spain  | 4/1/10   |
| A/swine/Spain/10/2011               | AFV33829 | H1N2 | Spain  | 2/1/11   |
| A/swine/Spain/12/2010               | AFV33785 | H3N2 | Spain  | 3/1/10   |
| A/swine/Spain/33601/2001            | ABD62836 | H3N2 | Spain  | 2001     |
| A/swine/Spain/39139/2002            | ABD62797 | H3N2 | Spain  | 2002     |
| A/swine/Spain/40564/2002            | AFR76785 | H1N2 | Spain  | 2002     |
| A/swine/Spain/42386/2002            | ABO44038 | H3N2 | Spain  | 2002     |
| A/swine/Spain/54008/2004            | ABE27167 | H3N2 | Spain  | 2004     |
| A/swine/Spain/80598LP1/2007         | CCQ71960 | H3N2 | Spain  | 2007     |
| A/swine/Spain/80598LP4/2007         | CCQ71984 | H1N2 | Spain  | 2007     |
| A/swine/Spain/82108/2007            | AFR76796 | H3N2 | Spain  | 2007     |
| A/swine/Spain/SF12091/2007          | CCQ71972 | H1N2 | Spain  | 2007     |
| A/swine/Spain/SF32071/2007          | CCG47912 | H3N2 | Spain  | 2007     |
| A/swine/Sweden/1021/2009            | ACU82397 | H1N2 | Sweden | 2/26/09  |
| A/swine/Sweden/9706/2010            | ADJ80236 | H1N2 | Sweden | 1/26/10  |
| A/swine/Tainan/46-4/2005            | ACO07053 | H1N2 | Taiwan | 4/14/05  |
| A/swine/Taiwan/7310/70              | CAC36997 | H3N2 | Taiwan | 1970     |
| A/swine/Taiwan/CO935/2004           | ABD85120 | H1N2 | Taiwan | 2004     |
| A/swine/Texas/00226/2003            | AHB51139 | H3N2 | USA    | 12/4/03  |
| A/swine/Texas/00376/2004            | AHB23185 | H3N2 | USA    | 7/22/04  |
| A/swine/Texas/00816/2005            | AHB22858 | H3N2 | USA    | 10/12/05 |
| A/swine/Texas/008648/2008           | ACV42119 | H1N2 | USA    | 2008     |
| A/swine/Texas/01308/2006            | AHB21042 | H1N2 | USA    | 11/2/06  |
| A/swine/Texas/01492/2007            | AHB21222 | H1N2 | USA    | 3/8/07   |
| A/swine/Texas/01976/2008            | ADM18064 | H1N2 | USA    | 2008     |
| A/swine/Texas/03042/2010            | AHB21727 | H3N2 | USA    | 7/2/10   |
| A/swine/Texas/050593/2008           | ACV42042 | H1N2 | USA    | 2008     |
| A/swine/Texas/050625/2008           | ACV42053 | H1N2 | USA    | 2008     |
| A/swine/Texas/4199-2/1998           | AAD51244 | H3N2 | USA    | 1998     |
| A/swine/Texas/A01049556/2011        | AEP17241 | H3N2 | USA    | 2/14/11  |
| A/swine/Texas/A01049915/2011        | AEP17053 | H3N2 | USA    | 4/28/11  |
| A/swine/Texas/SG1186/2004           | AHB20825 | H3N2 | USA    | 10/22/04 |

|                                 |          |      |          |          |
|---------------------------------|----------|------|----------|----------|
| A/swine/Texas/SG1250/2006       | AHB21054 | H1N2 | USA      | 6/21/06  |
| A/swine/Texas/SG1270/2007       | AHB23736 | H3N2 | USA      | 3/1/07   |
| A/swine/Texas/SG1501/2010       | AHB23146 | H3N2 | USA      | 4/20/10  |
| A/swine/Thailand/CM480/2009     | AGK24399 | H3N2 | Thailand | 11/17/09 |
| A/swine/Thailand/CM481/2009     | AGK24289 | H3N2 | Thailand | 11/17/09 |
| A/swine/Thailand/CU-BN53/2012   | AGG53179 | H3N2 | Thailand | 3/15/12  |
| A/swine/Thailand/CU-BN54/2012   | AGG53170 | H3N2 | Thailand | 3/15/12  |
| A/swine/Thailand/CU-CG43/2011   | AFO82779 | H3N2 | Thailand | 2011/03  |
| A/swine/Thailand/CU-CG45/2011   | AFO82778 | H3N2 | Thailand | 2011/03  |
| A/swine/Thailand/CU-CG48/2011   | AFO82780 | H3N2 | Thailand | 2011/03  |
| A/swine/Thailand/CU-CG51/2011   | AGG53160 | H3N2 | Thailand | 11/14/11 |
| A/swine/Thailand/CU-CG55/2011   | AGG53154 | H3N2 | Thailand | 11/14/11 |
| A/swine/Thailand/CU-CT63/2011   | AGG53138 | H1N2 | Thailand | 12/18/11 |
| A/swine/Thailand/CU-CT83/2011   | AGG53129 | H1N2 | Thailand | 12/18/11 |
| A/swine/Thailand/CU-P43/2012    | AGG53120 | H3N2 | Thailand | 1/9/12   |
| A/swine/Thailand/CU-P53/2012    | AGG53110 | H3N2 | Thailand | 1/9/12   |
| A/swine/Thailand/CU-PN4-1/2009  | ADY80143 | H3N2 | Thailand | 2009/03  |
| A/swine/Thailand/CU-PN4-2/2009  | ADY80144 | H3N2 | Thailand | 2009/03  |
| A/swine/Thailand/KU5.1/2004     | ACL11954 | H3N2 | Thailand | 9/19/04  |
| A/swine/Thailand/PB482/2009     | AGK24409 | H3N2 | Thailand | 11/17/09 |
| A/swine/Thailand/PB483/2009     | AGJ73473 | H3N2 | Thailand | 11/17/09 |
| A/swine/Thailand/PB484/2009     | AGK24419 | H3N2 | Thailand | 11/17/09 |
| A/swine/Thailand/PB485/2009     | AGJ73463 | H3N2 | Thailand | 11/17/09 |
| A/swine/Thailand/PB486/2009     | AGK24299 | H3N2 | Thailand | 11/17/09 |
| A/swine/Thailand/S1/2005        | ACM80373 | H3N2 | Thailand | 2005/08  |
| A/swine/Tianjin/1/2004          | ACT97069 | H1N2 | China    | 2004     |
| A/swine/Tianjin/1/2007          | ADU02108 | H1N2 | China    | 2007/12  |
| A/swine/Tochigi/1/2008          | BAJ11923 | H1N2 | Japan    | 2008     |
| A/swine/Tochigi/2/2011          | BAM78378 | H1N2 | Japan    | 2/21/11  |
| A/swine/Udon Thani/NIAH464/2004 | BAH02112 | H3N2 | Thailand | 2004     |
| A/swine/UK/119404/91            | CAC86325 | H3N2 | UK       | 1991     |
| A/swine/Virginia/A01203437/2012 | AFM46446 | H3N2 | USA      | 4/16/12  |
| A/swine/Virginia/A01432419/2013 | AGG86714 | H1N2 | USA      | 2013/02  |
| A/swine/Virginia/SG1386/2011    | AHB21916 | H1N2 | USA      | 11/4/11  |
| A/swine/Vladimir/VL/2009        | AFV31494 | H3N2 | Russia   | 8/7/09   |
| A/Swine/Wisconsin/14094/99      | AAG10749 | H3N2 | USA      | 1999     |
| A/swine/Wisconsin/194/1980      | ABD61252 | H3N2 | USA      | 1980     |
| A/swine/Wisconsin/H02AS8/2002   | AFR76807 | H3N2 | USA      | 2002     |
| A/swine/Wyoming/A01397400/2013  | AGS08798 | H3N2 | USA      | 6/25/13  |
| A/swine/Yokohama/aq114/2011     | BAM78394 | H3N2 | Japan    | 3/8/11   |
| A/swine/Yokohama/aq138/2011     | BAM78402 | H3N2 | Japan    | 3/8/11   |
| A/swine/Zhejiang/1/2004         | AAZ79393 | H1N2 | China    | 2004     |



**Table S5. Introductions with < 1 year of onward transmission in swine.** The 19 additional introductions of human seasonal influenza viruses in swine that were detected using all available sequence data, including additional HA and NA sequences, for which evidence of onward transmission in swine for more than one year was lacking.

|    | <b>Virus name</b>                                                                                             | <b>Segments</b> |
|----|---------------------------------------------------------------------------------------------------------------|-----------------|
| 1  | <i>A/sw/Hong Kong/4/1976/H3N2</i>                                                                             | NA              |
| 2  | <i>A/sw/Colorado/1/1977/H3N2</i>                                                                              | HA and NA       |
| 3  | <i>A/sw/Obihiro/10/1985/H3N2</i>                                                                              | HA and NA       |
| 4  | <i>A/sw/Obihiro/5/1992/H1N1</i>                                                                               | NA              |
| 5  | <i>A/sw/Shizuoka/120/97/H3N2</i>                                                                              | NA              |
| 6  | <i>A/sw/Ontario/00130/97/H3N2</i>                                                                             | HA and NA       |
| 7  | <i>A/sw/Finistere/129/99/H3N2</i>                                                                             | NA              |
| 8  | <i>A/sw/Hong Kong/q066/99/H3N2</i>                                                                            | NA              |
| 9  | <i>A/sw/Hong Kong/NS140/2000/H1N1</i>                                                                         | NA              |
| 10 | <i>A/sw/Hong Kong/312/00/H3N2</i>                                                                             | HA              |
| 11 | <i>A/sw/Hong Kong/9285/01/H3N2</i>                                                                            | HA and NA       |
|    | <i>A/sw/Hong Kong/1311/01/H3N2</i>                                                                            |                 |
| 12 | <i>A/sw/Hong Kong/1212/02/H3N2,</i><br><i>A/sw/Hong Kong/411/02/H3N2,</i><br><i>A/sw/Hong Kong/74/02/H3N2</i> | HA and NA       |
| 13 | <i>A/sw/Ehime/1/2002/H3N2 and</i><br><i>A/sw/Ehime/2/2002/H3N2</i>                                            | HA              |
| 14 | <i>A/sw/Ontario/52156/2003/H1N2</i>                                                                           | whole genome    |
| 15 | <i>A/sw/Colombo/48/2004/H3N2</i>                                                                              | HA and NA       |

|    |                                   |           |
|----|-----------------------------------|-----------|
| 16 | A/sw/Ontario/55383/2004/H1N2      | HA        |
|    | A/sw/Ontario/48235/2005/H1N2      |           |
| 17 | A/sw/SK/11-35/2009/H1N1           | HA        |
|    | A/sw/SK/11-16/2009/H1N1           |           |
| 18 | A/sw/Illinois/02757/2009/H1N1     | HA and NA |
| 19 | A/sw/Illinois/A01201763/2011/H3N2 | HA        |

**Table S6. Introductions identified in HA/NA analysis.** The 21 additional introductions of human seasonal influenza viruses in swine (labeled a - u) that were detected using all available HA and NA sequence data (see Figs. S9-S11).

| Introduction                   | Viruses                              |                                  |
|--------------------------------|--------------------------------------|----------------------------------|
| China-a                        | A/swine/Hong Kong/81/1978/H3N2       | A/swine/Guangdong/L21/2011/H3N2  |
|                                | A/swine/Hong Kong/126/1982/H3N2      |                                  |
| Europe-b                       | A/swine/Italy/1850/1977/H3N2         | A/swine/Italy/6/1981/H3N2        |
| Europe-c                       | A/swine/Potsdam/35/82/H3N2           |                                  |
| Europe-d                       | A/swine/Leipzig/145/92/H3N2          |                                  |
| USA-e                          | A/swine/Wisconsin/194/1980/H3N2      |                                  |
| China-f                        | A/swine/Tainan/103-11/2003/H3N1      | A/swine/Taiwan/0408/2004/H3N1    |
| Europe-g                       | A/swine/Karrenzien/2/87/H3N2         |                                  |
| Indonesia-h                    | A/swine/Indonesia/P6-09-04/2004/H3N1 |                                  |
| Korea-i                        | A/swine/Korea/CN22/2006/H3N1         | A/swine/Korea/PZ72-1/2006/H3N1   |
| China-j                        | A/swine/Jilin/19/2007/H3N2           | A/swine/Jilin/37/2008/H3N2       |
| Japan-k                        | A/swine/Ehime/2/2002/H3N2            | A/swine/Ehime/1/2002/H3N2        |
| Japan-l                        | A/swine/Kanagawa/2/1978/H1N2         |                                  |
| Japan-m                        | A/sw/Obihiro/1/1994/H3N2             |                                  |
| Thailand-n                     | A/swine/Thailand/CU-CT83/2011/H1N2   |                                  |
|                                | A/swine/Thailand/CU-CT63/2011/H1N2   |                                  |
| USA-o                          | A/swine/North Carolina/35922/98/H3N2 |                                  |
| Europe-p                       | A/swine/Denmark/10302-2/2012-H1N2    |                                  |
| Europe-q                       | A/swine/Spain/09/2010-H1N2           |                                  |
| Europe-r                       | A/swine/Italy/81062/2009-H1N2        | A/swine/Italy/186822/2011-H1N2   |
|                                | A/swine/Italy/70757/2009-H1N2        | A/swine/Italy/289700/2009-H1N2   |
|                                | A/swine/Italy/274298/2009-H1N2       | A/swine/Italy/320546/2009-H1N2   |
|                                | A/swine/Italy/59209/2009-H1N2        | A/swine/Italy/50568/2005-H1N2    |
|                                | A/swine/Italy/107798/2012-H1N2       | A/swine/Italy/269578/2006-H1N2   |
|                                | A/swine/Italy/315977/2011-H1N2       | A/swine/Italy/226846/2006-H1N2   |
|                                | A/swine/Italy/170177/2010-H1N2       | A/swine/Italy/20333/2006-H1N2    |
|                                | A/swine/Italy/16959/2011-H1N2        | A/swine/Italy/267010/2005-H1N2   |
|                                | A/swine/Italy/81226/2009-H1N2        | A/swine/Italy/233139/2005-H1N2   |
|                                | A/swine/Italy/166015/2010-H1N2       | A/swine/Italy/232134/2005-H1N2   |
|                                | A/swine/Italy/76687/2010-H1N2        | A/swine/Italy/29141/2008-H1N2    |
|                                | A/swine/Italy/26654/2012-H1N2        | A/swine/Italy/114347-1/2006-H1N2 |
|                                | A/swine/Italy/321986/2009-H1N2       | A/swine/Italy/53991/2005-H1N2    |
|                                | A/swine/Italy/310411/2009-H1N2       | A/swine/Italy/203047/2005-H1N2   |
|                                | A/swine/Italy/85218/2010-H1N2        | A/swine/Italy/626-2/2006-H1N2    |
|                                | A/swine/Italy/254261/2010-H1N2       | A/swine/Italy/191985/2009-H1N2   |
|                                | A/swine/Italy/282964/2010-H1N2       | A/swine/Italy/198260/2008-H1N2   |
| A/swine/Italy/134110/2011-H1N2 | A/swine/Italy/308725/2011-H1N2       |                                  |

China-s  
China-t  
China-u

A/swine/Italy/149992/2010-H1N2  
A/swine/Italy/63580/2010-H1N2  
A/swine/Italy/118616/2010-H1N2  
A/swine/Hong Kong/4361/99-H3N2  
A/swine/Fujian/0325/2008/H1N1  
A/swine/Hong-Kong/1435/2006/H1N1

A/swine/Italy/4675/2003-H1N2  
A/swine/Italy/38272/2010-H1N2  
A/swine/Italy/195399/2011-H1N2  
A/swine/Hong Kong/7220/00-H3N2
